# Supplementary material
Source: PubMed Central journal article supplement (PMC1383639)

Cluster 1 (181 genes). SHR=0.538.

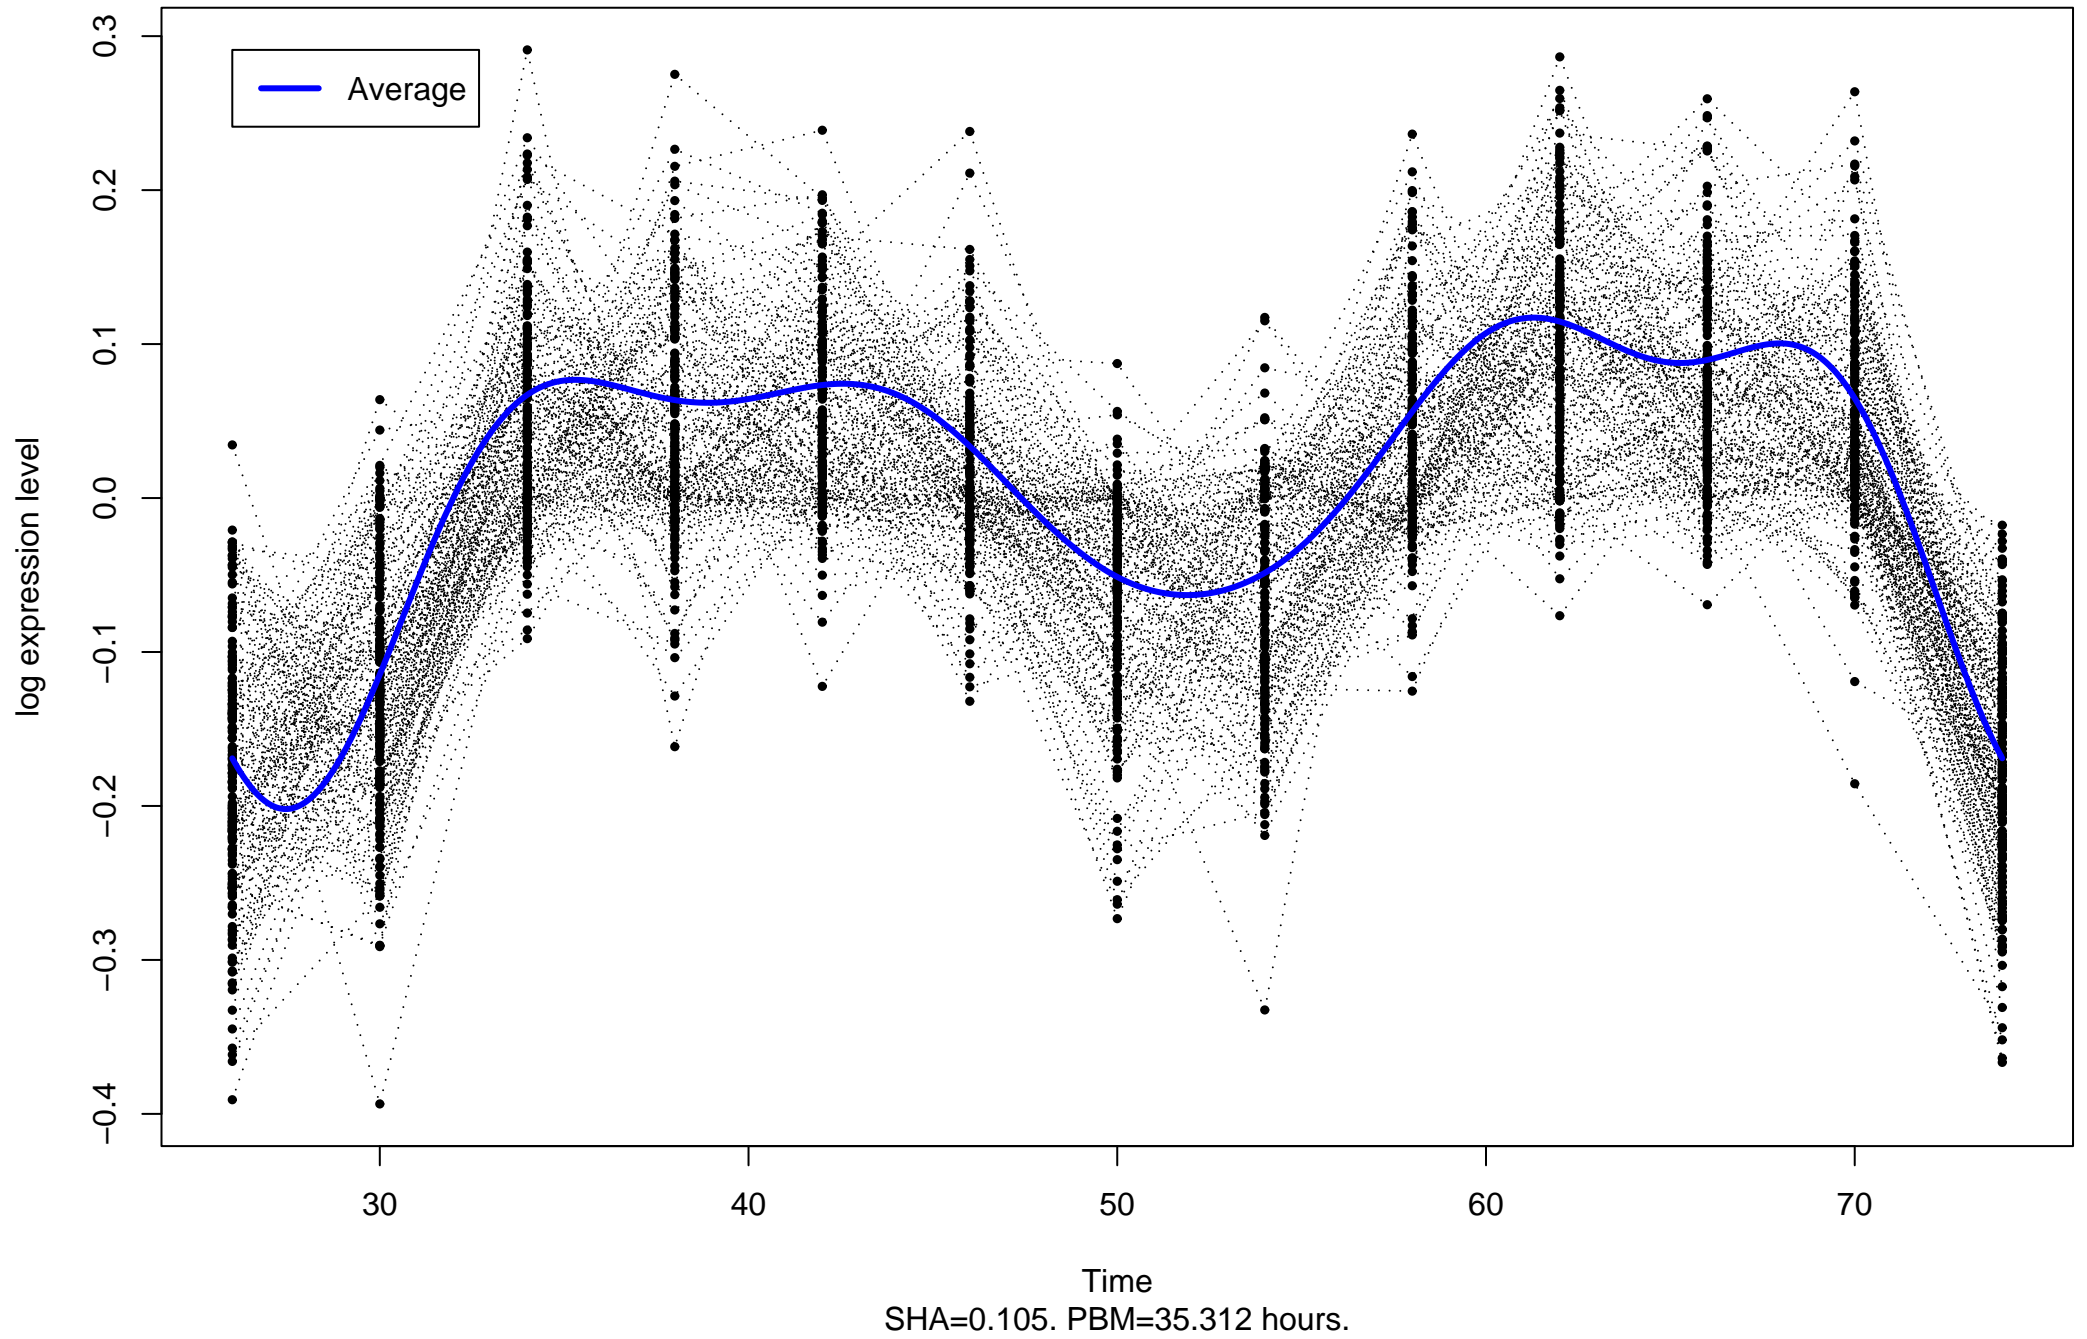

Cluster 2 (311 genes). SHR=0.452.

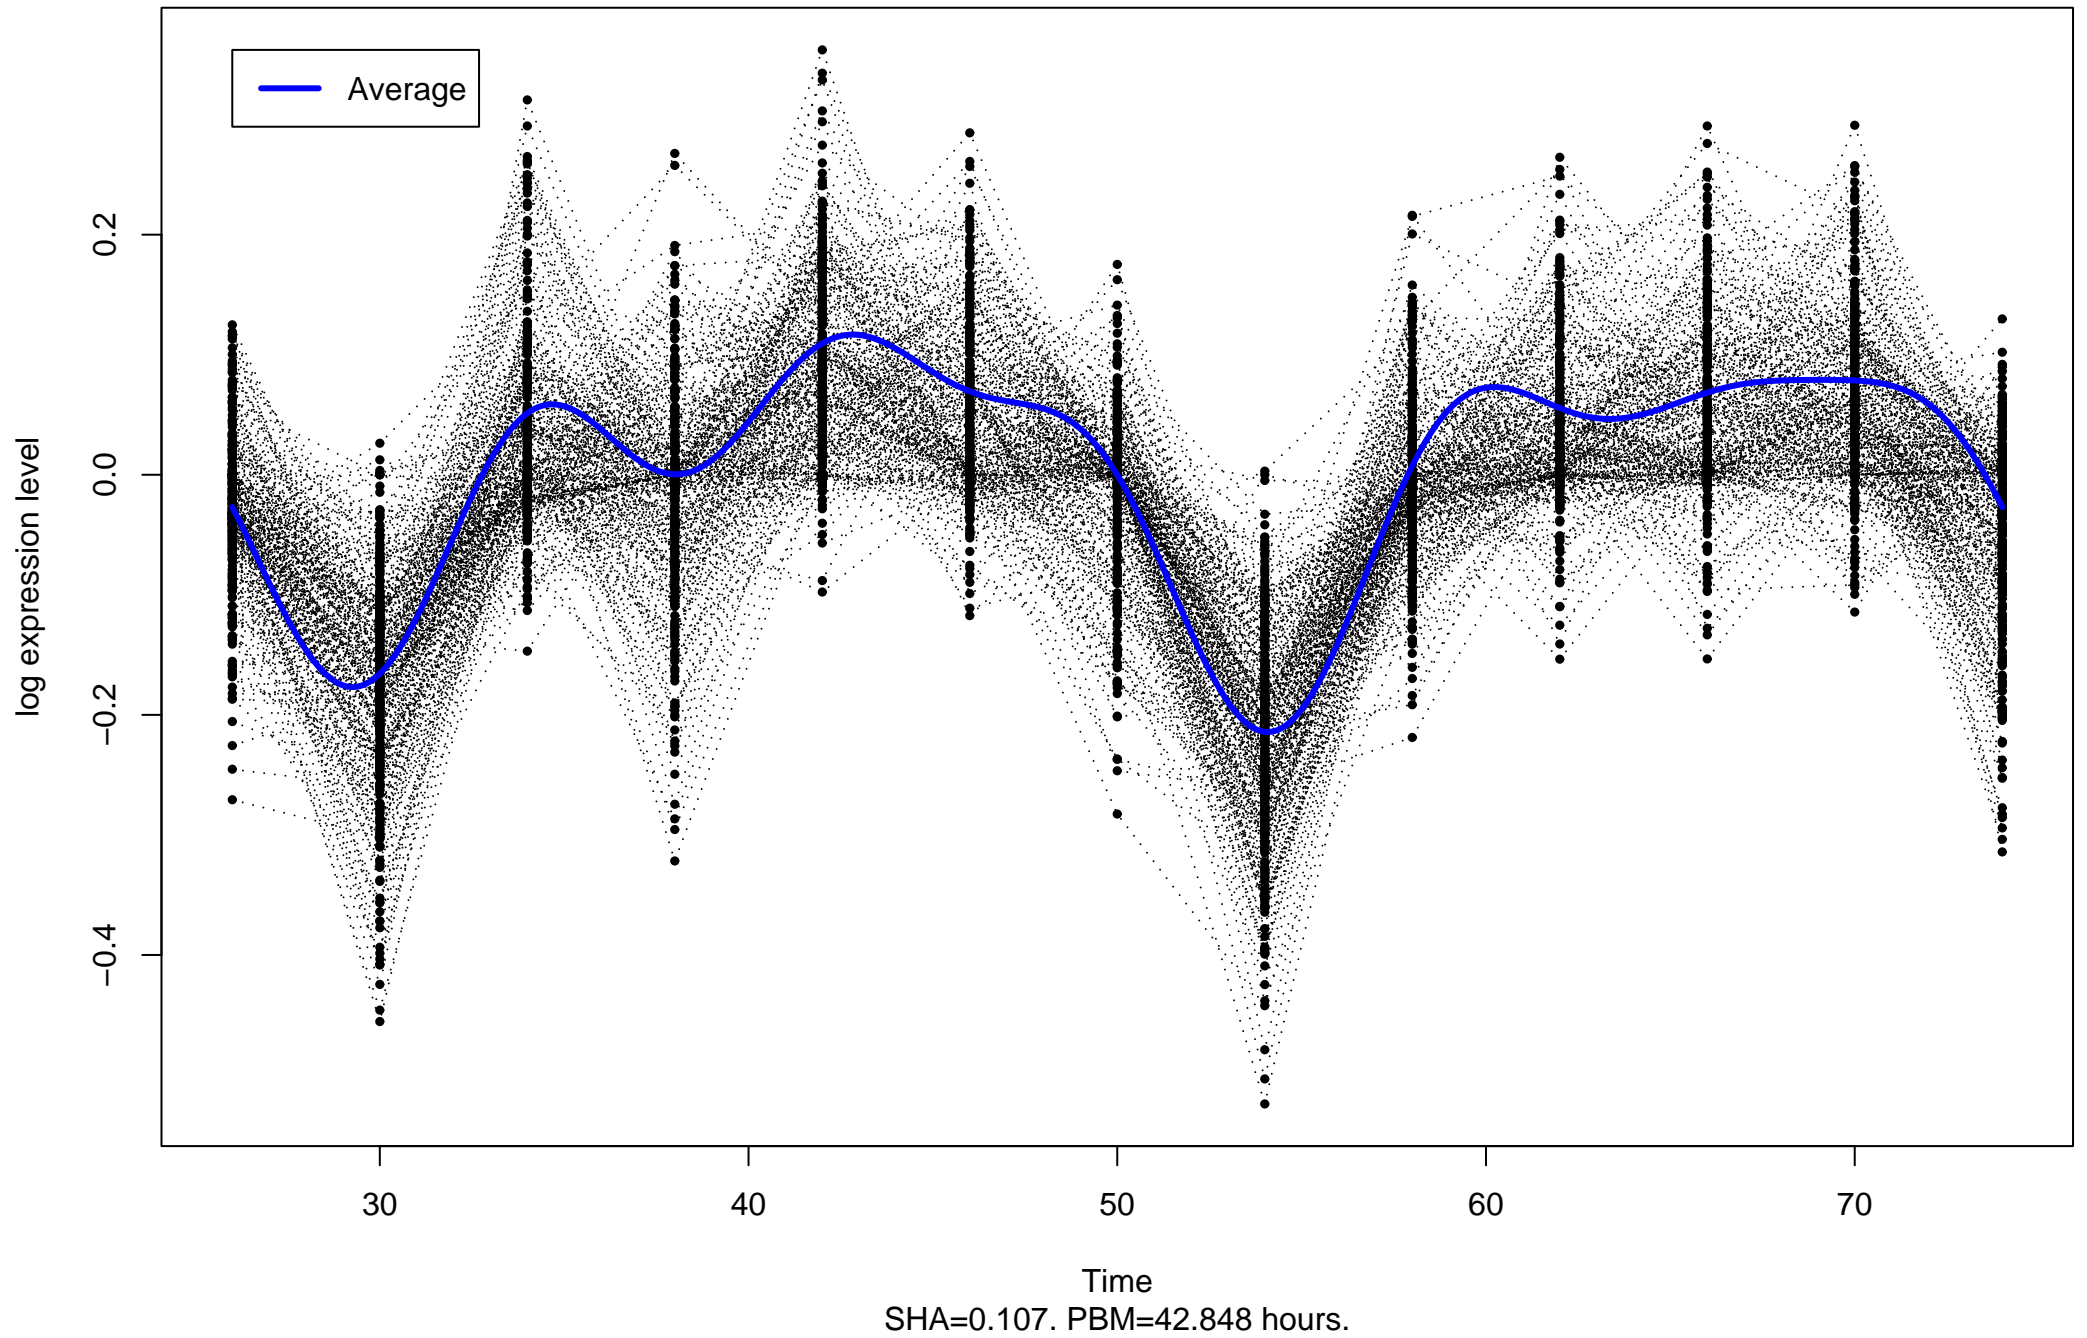

Cluster 3 (208 genes). SHR=0.711.

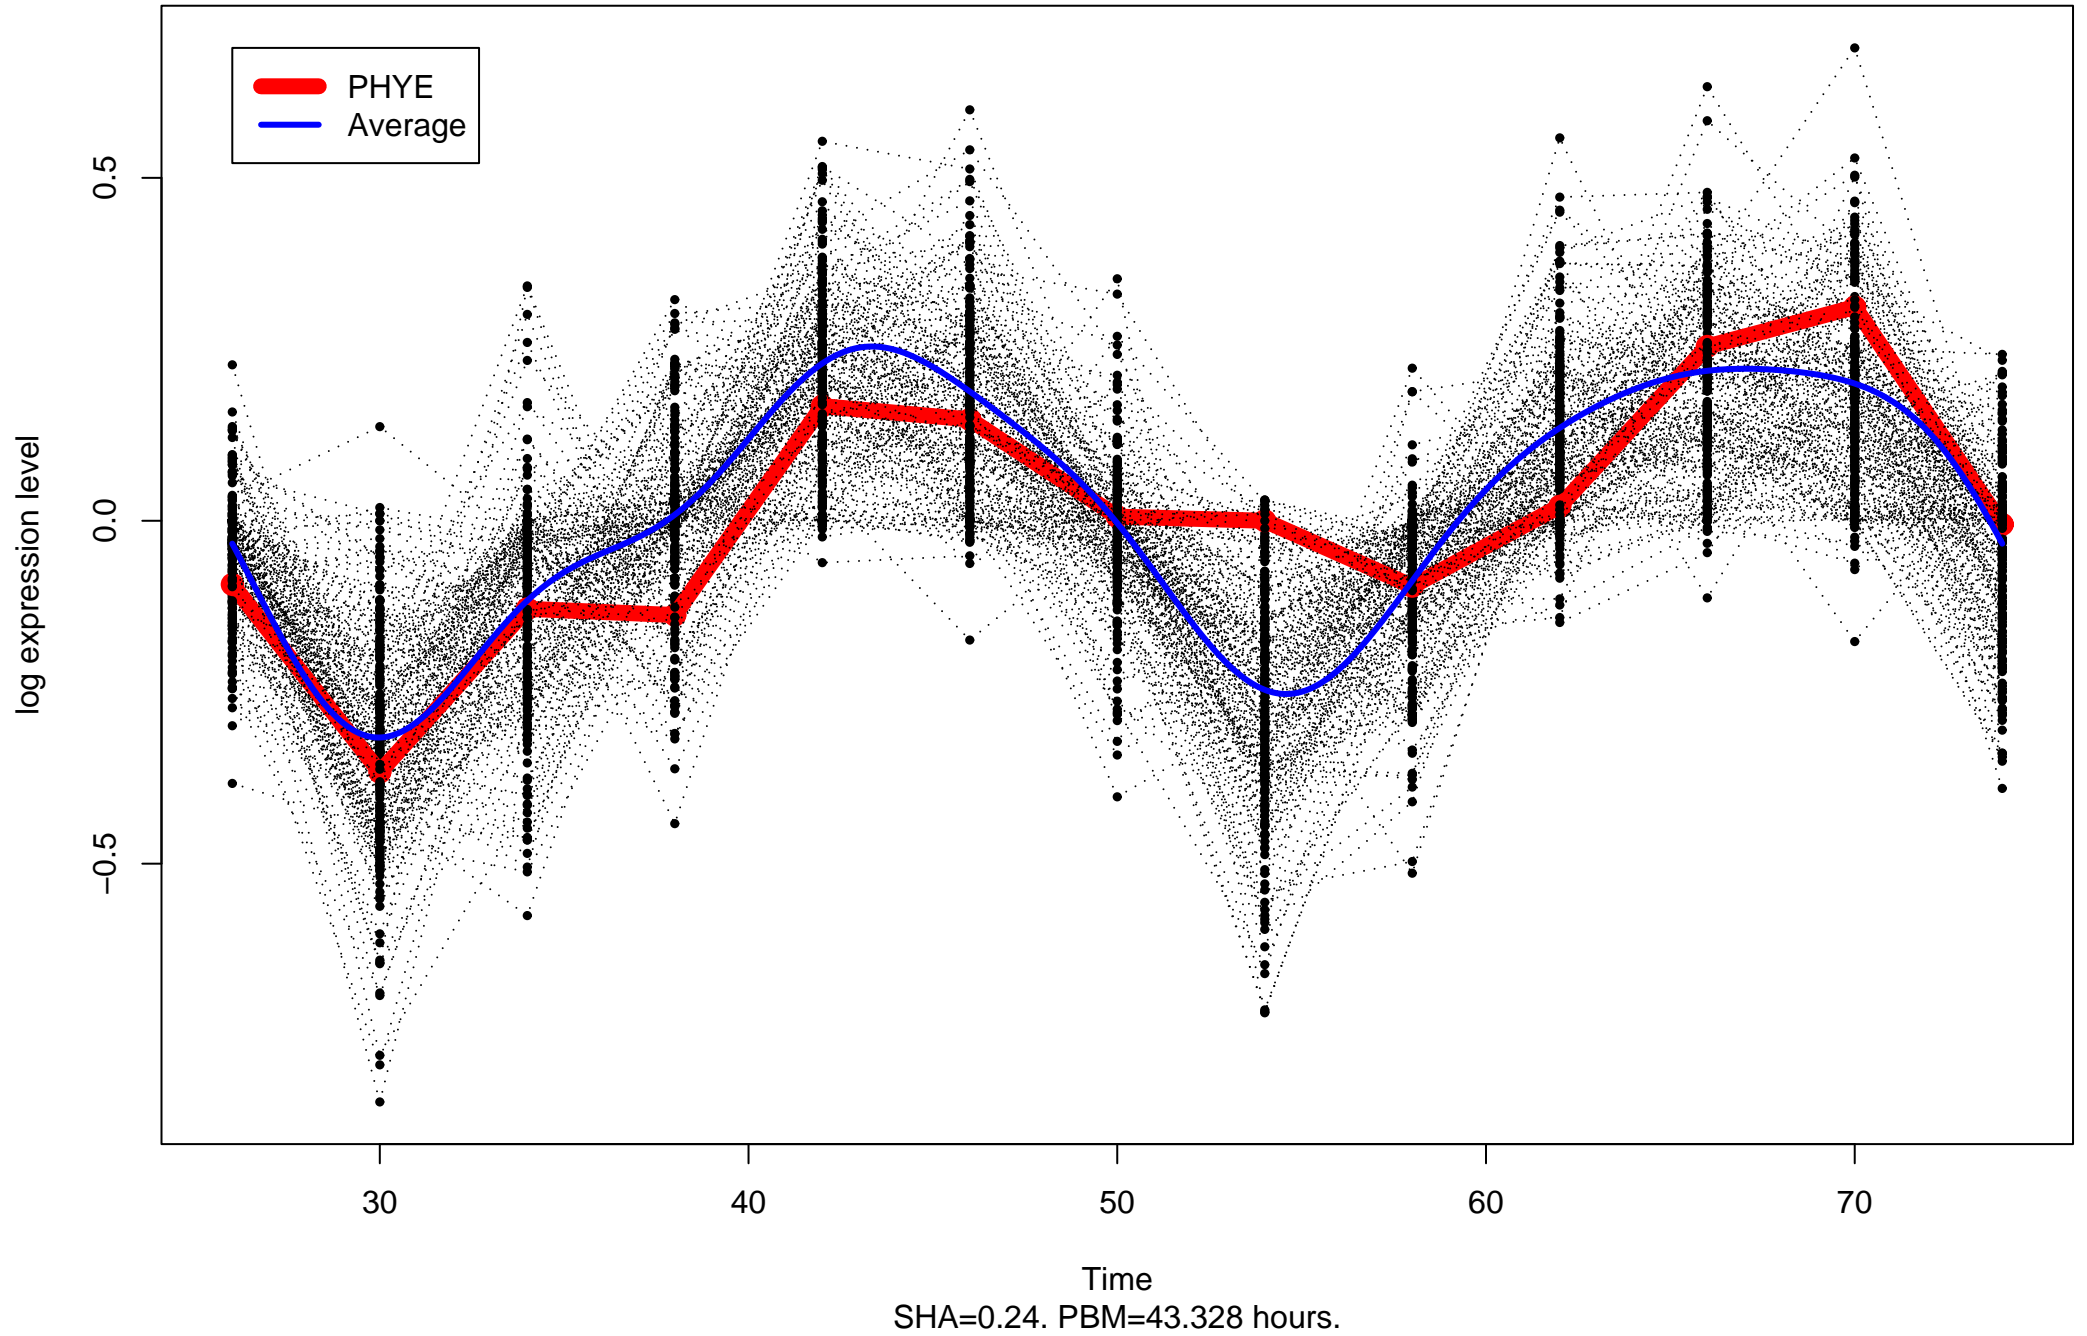

Cluster 4 (72 genes). SHR=0.763.

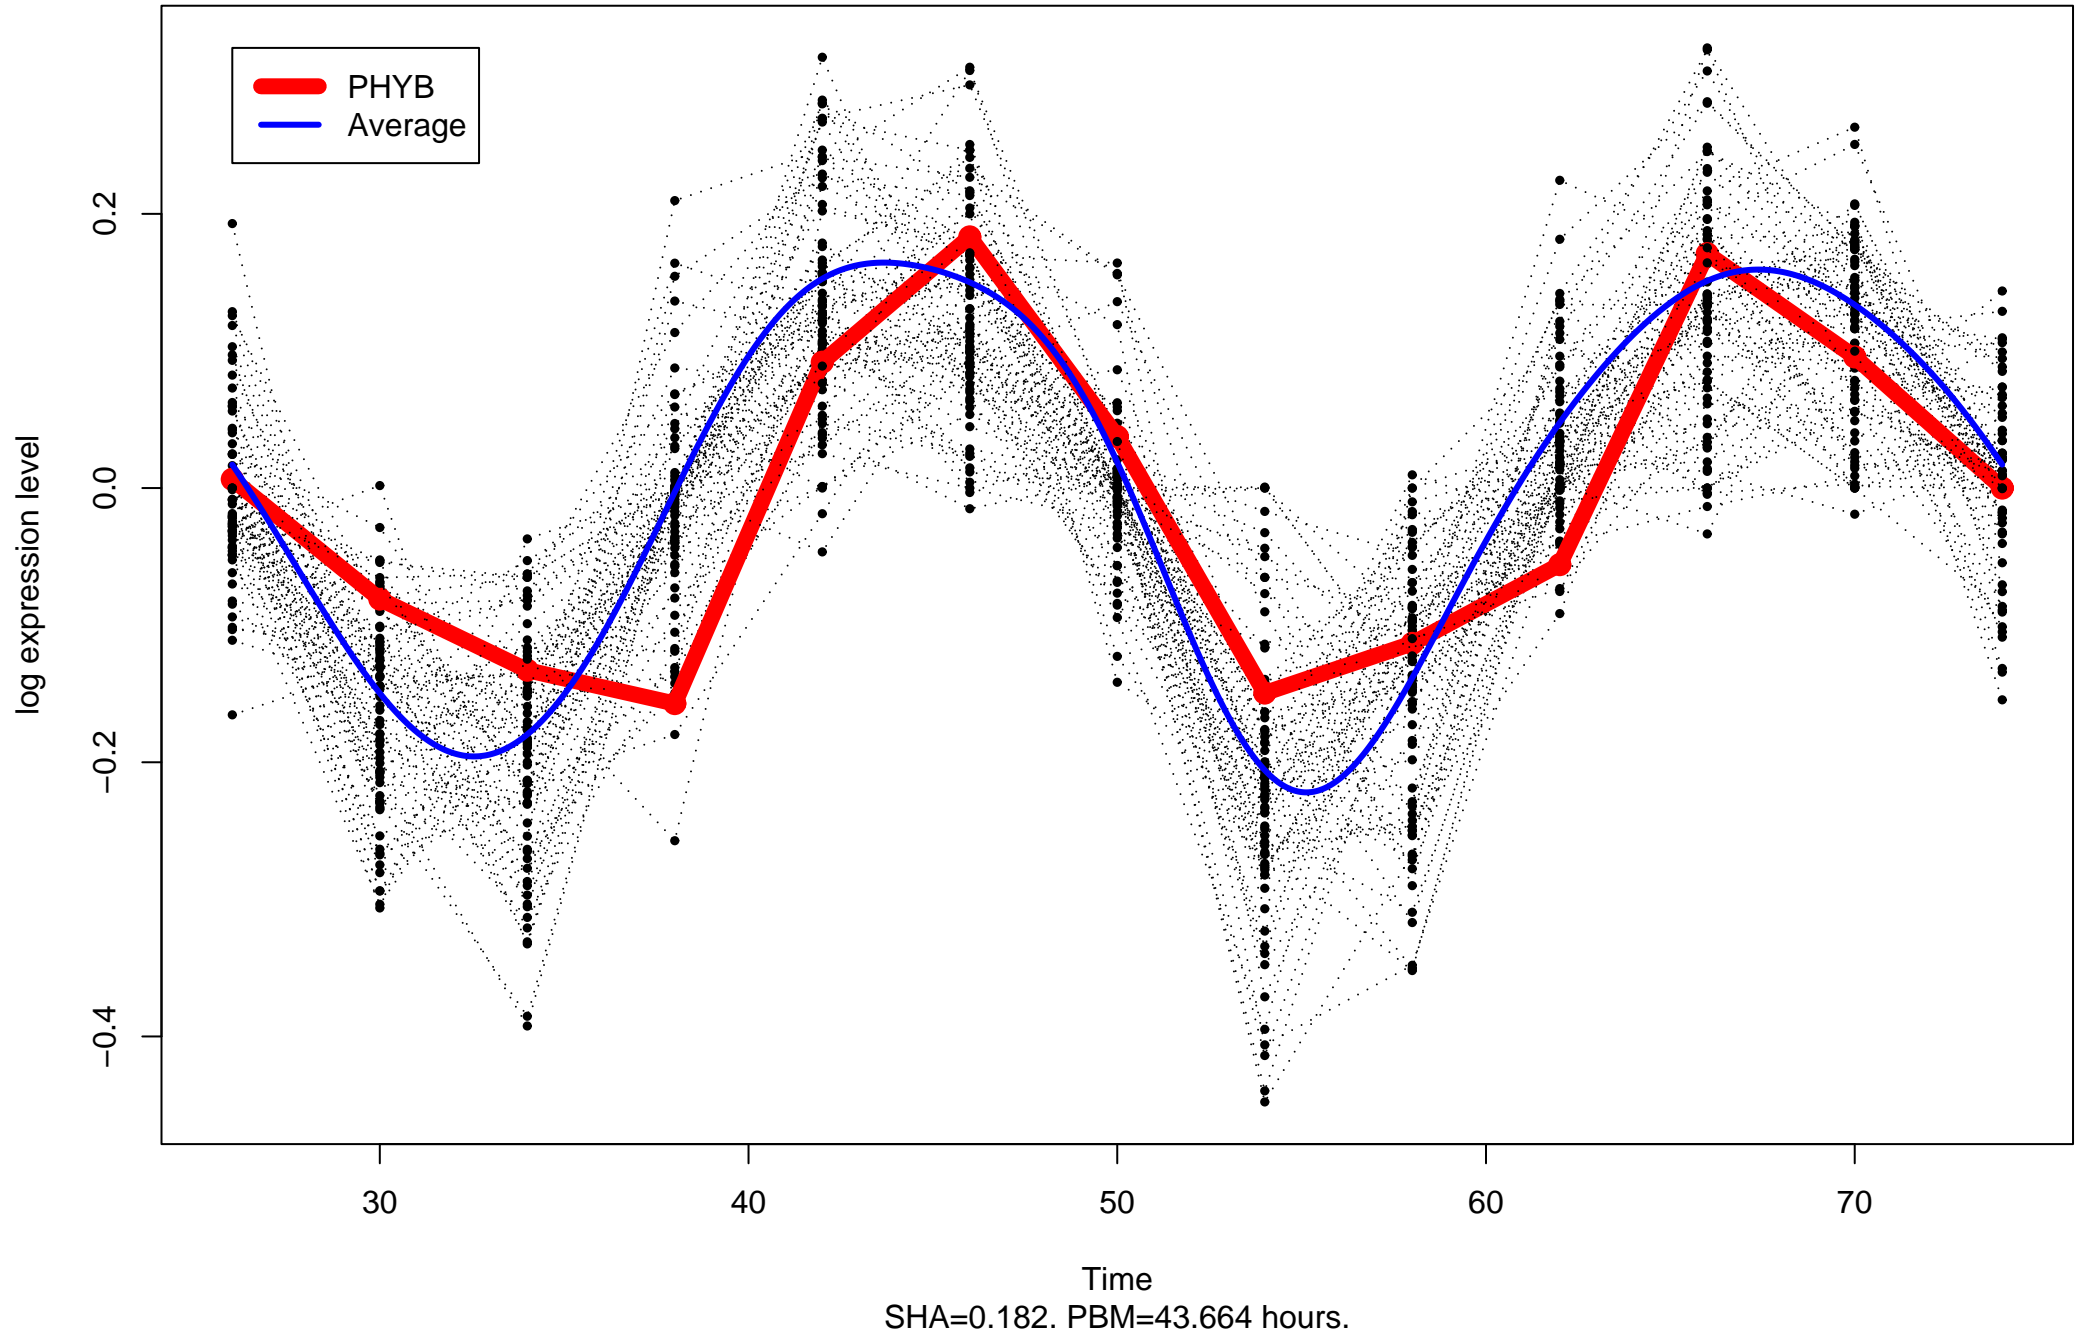

Cluster 5 (280 genes). SHR=0.608.

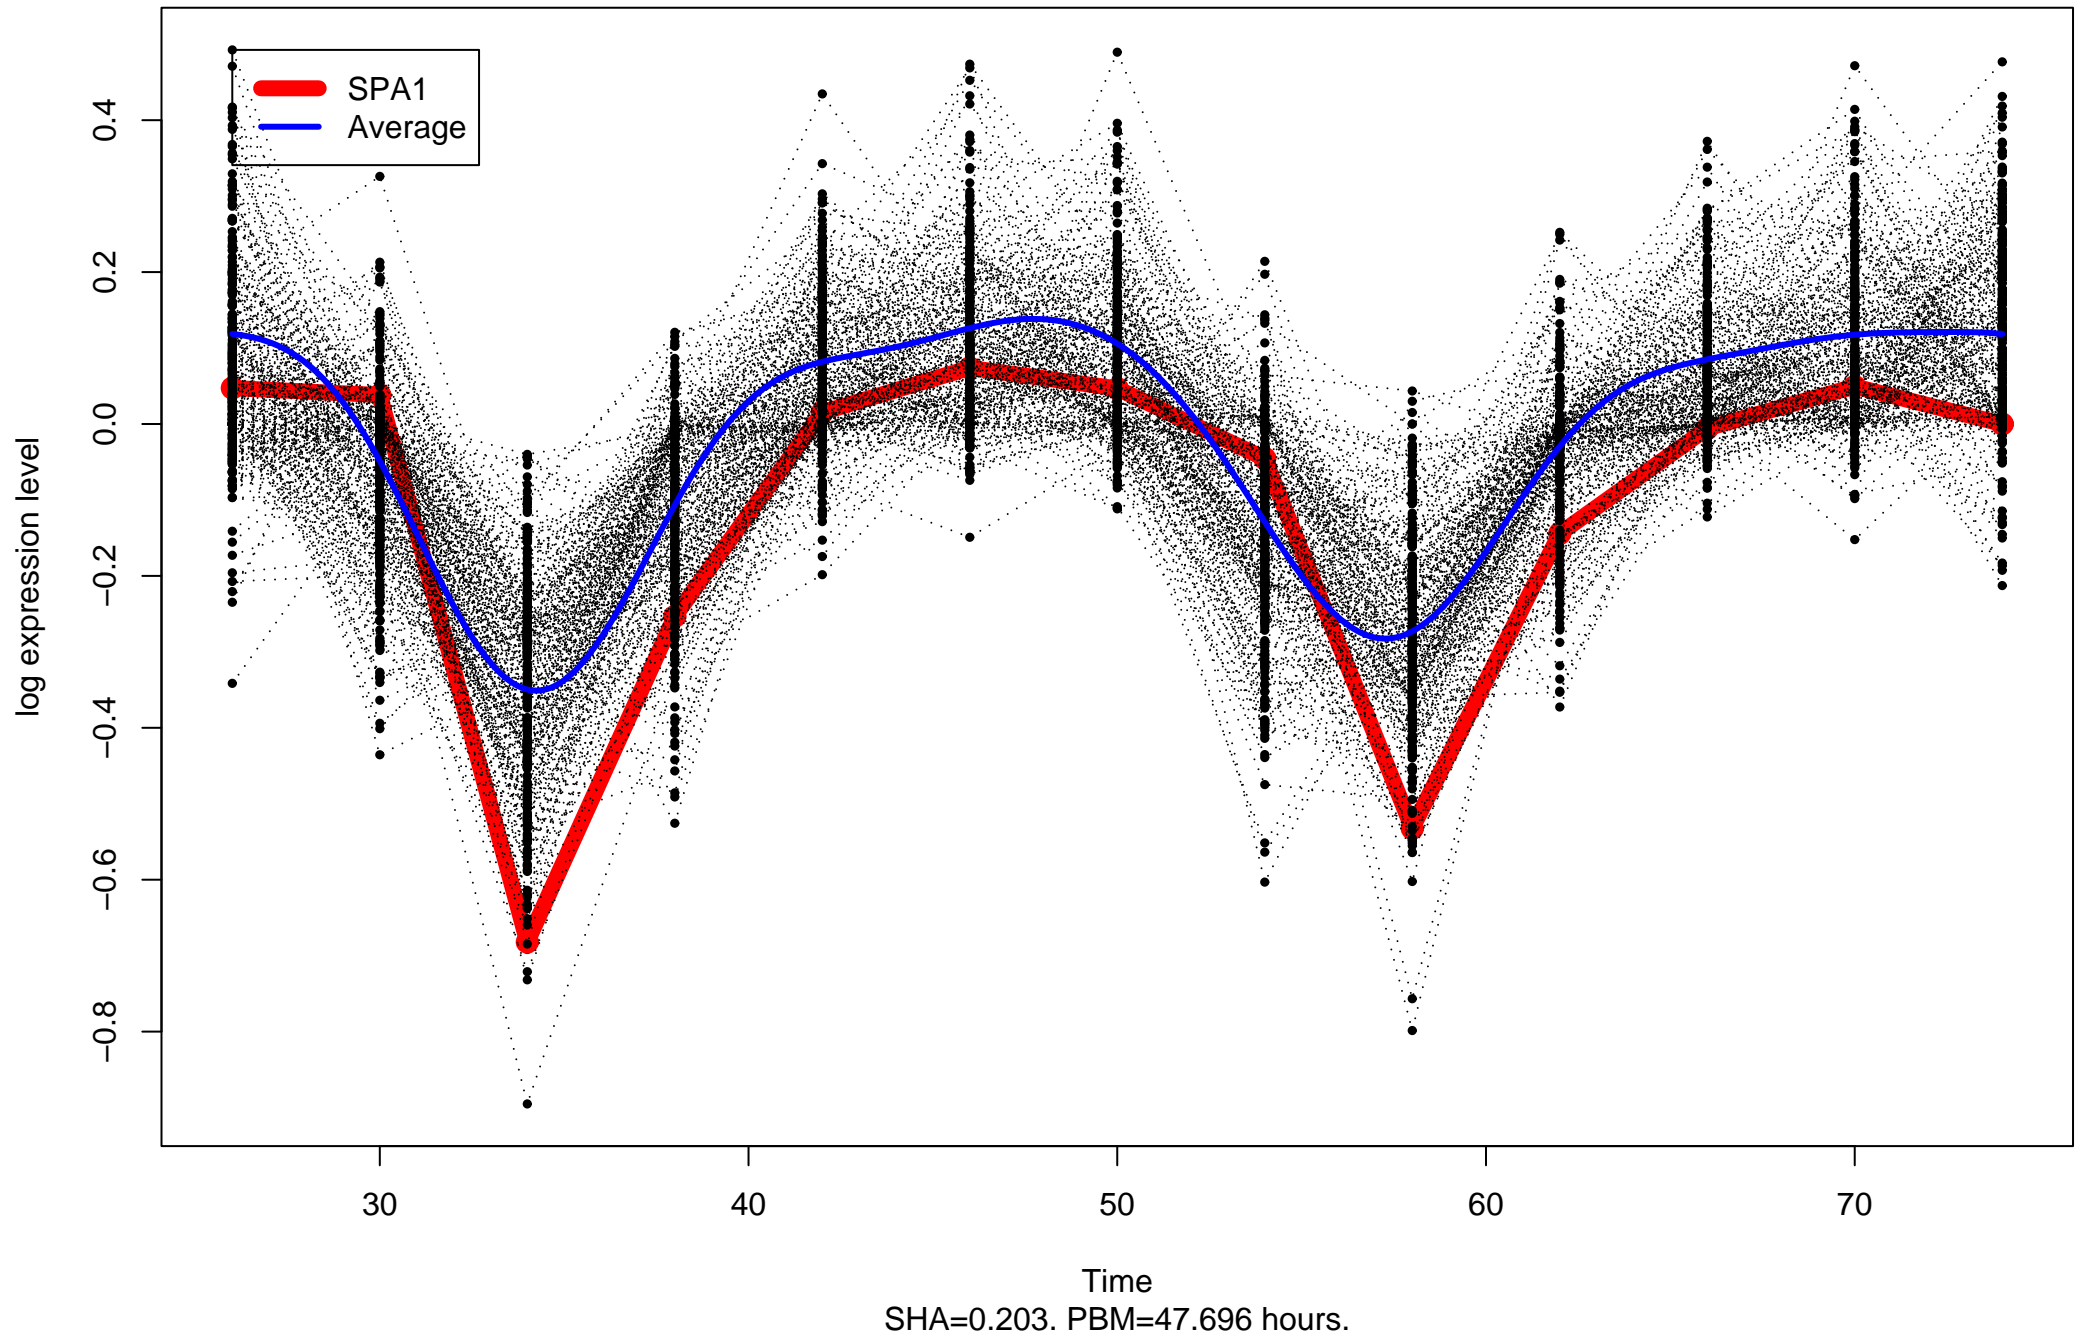

Cluster 6 (54 genes). SHR=0.603.

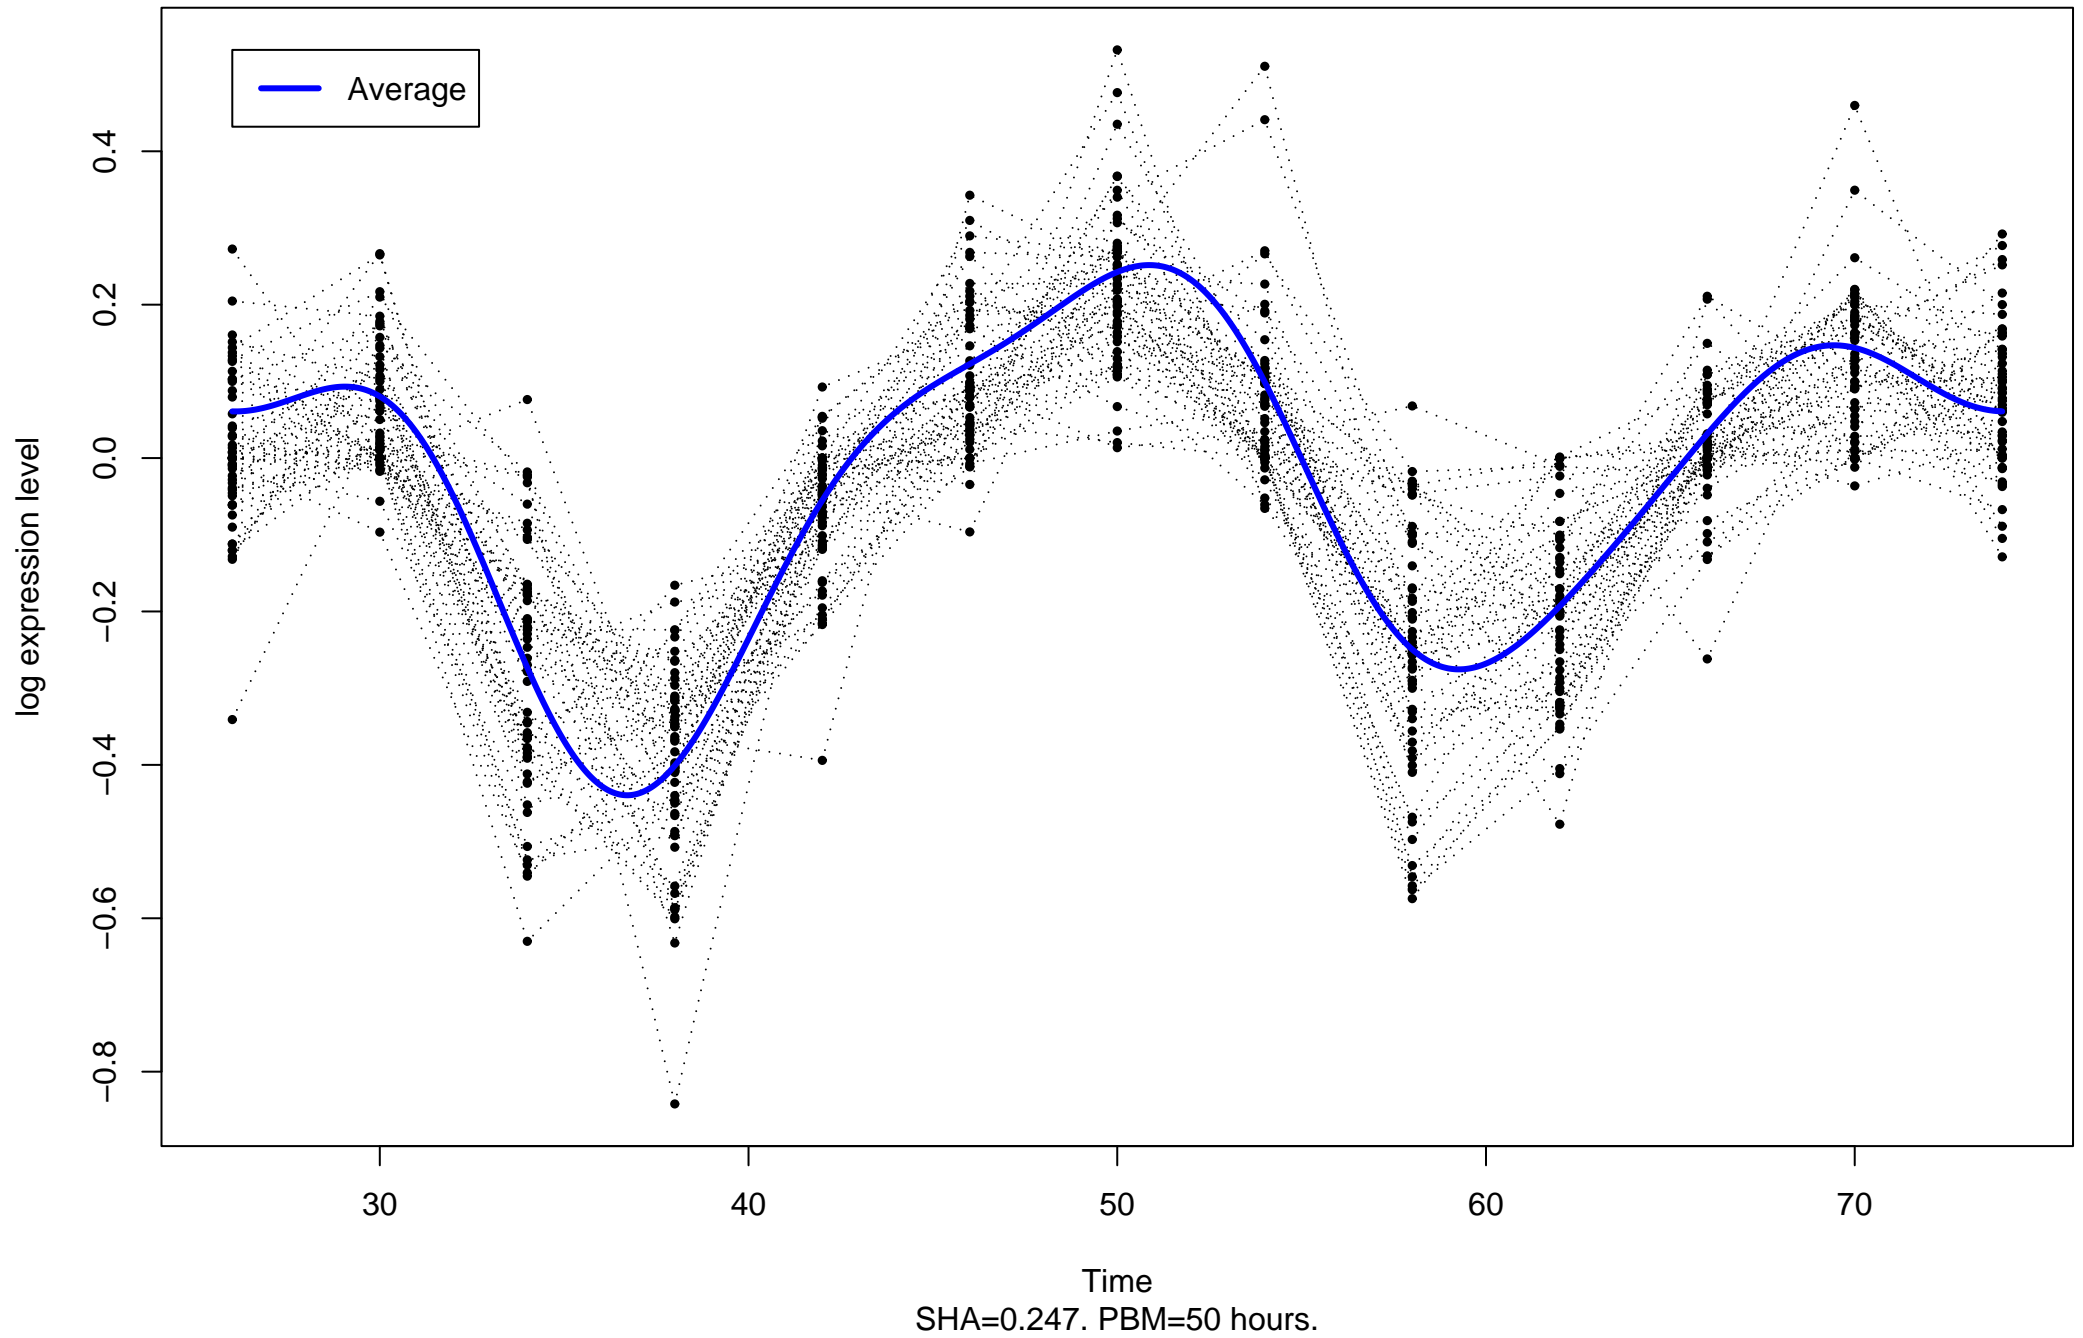

Cluster 7 (306 genes). SHR=0.639.

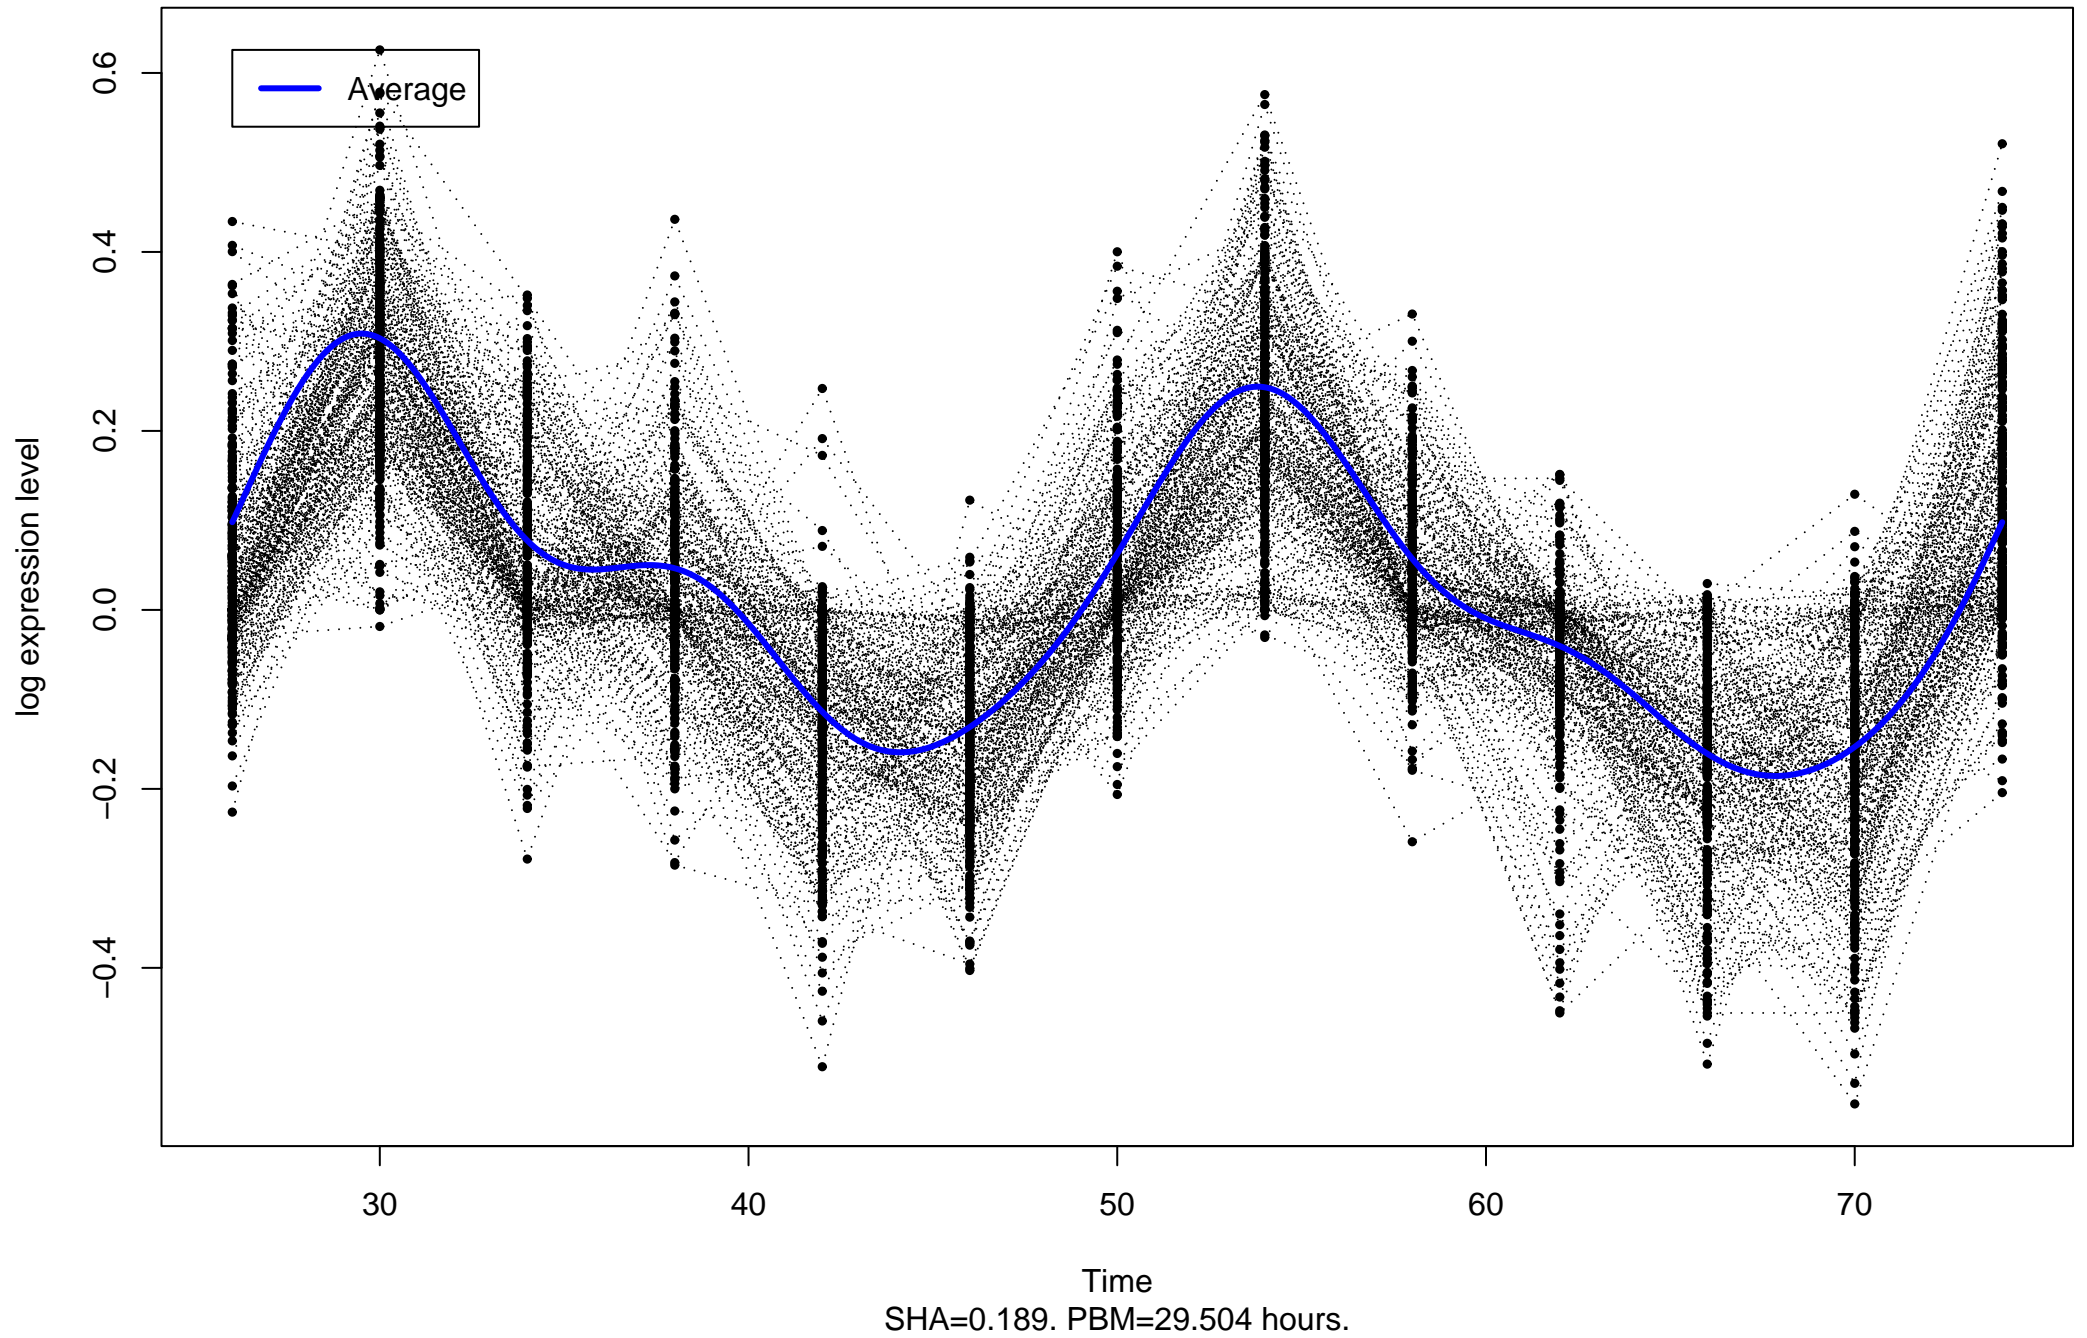

Cluster 8 (53 genes). SHR=0.619.

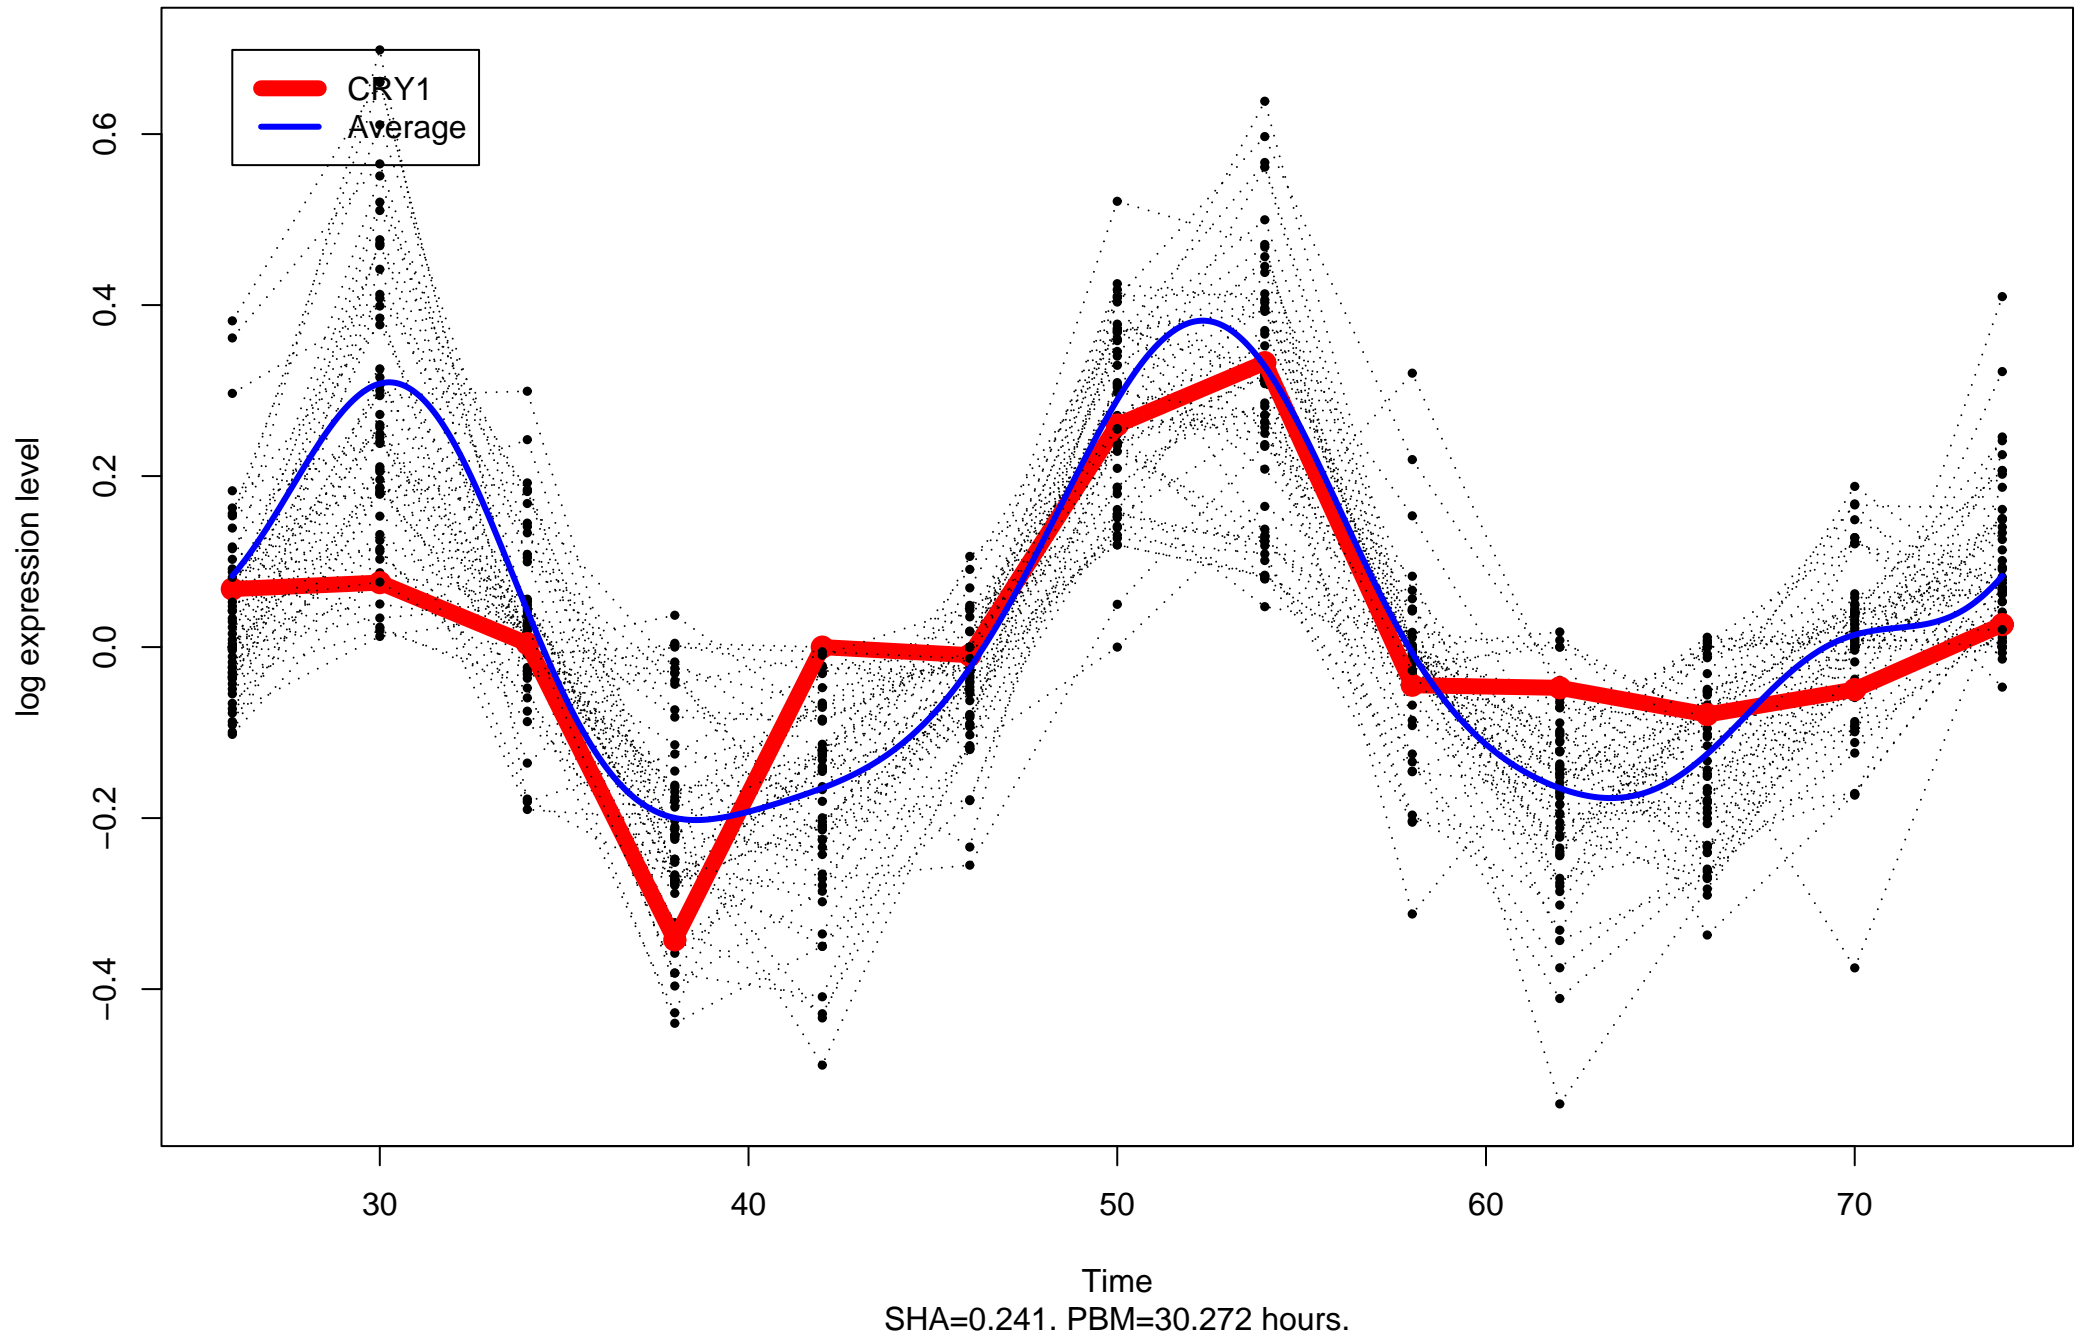



Cluster 9 (292 genes). SHR=0.779.

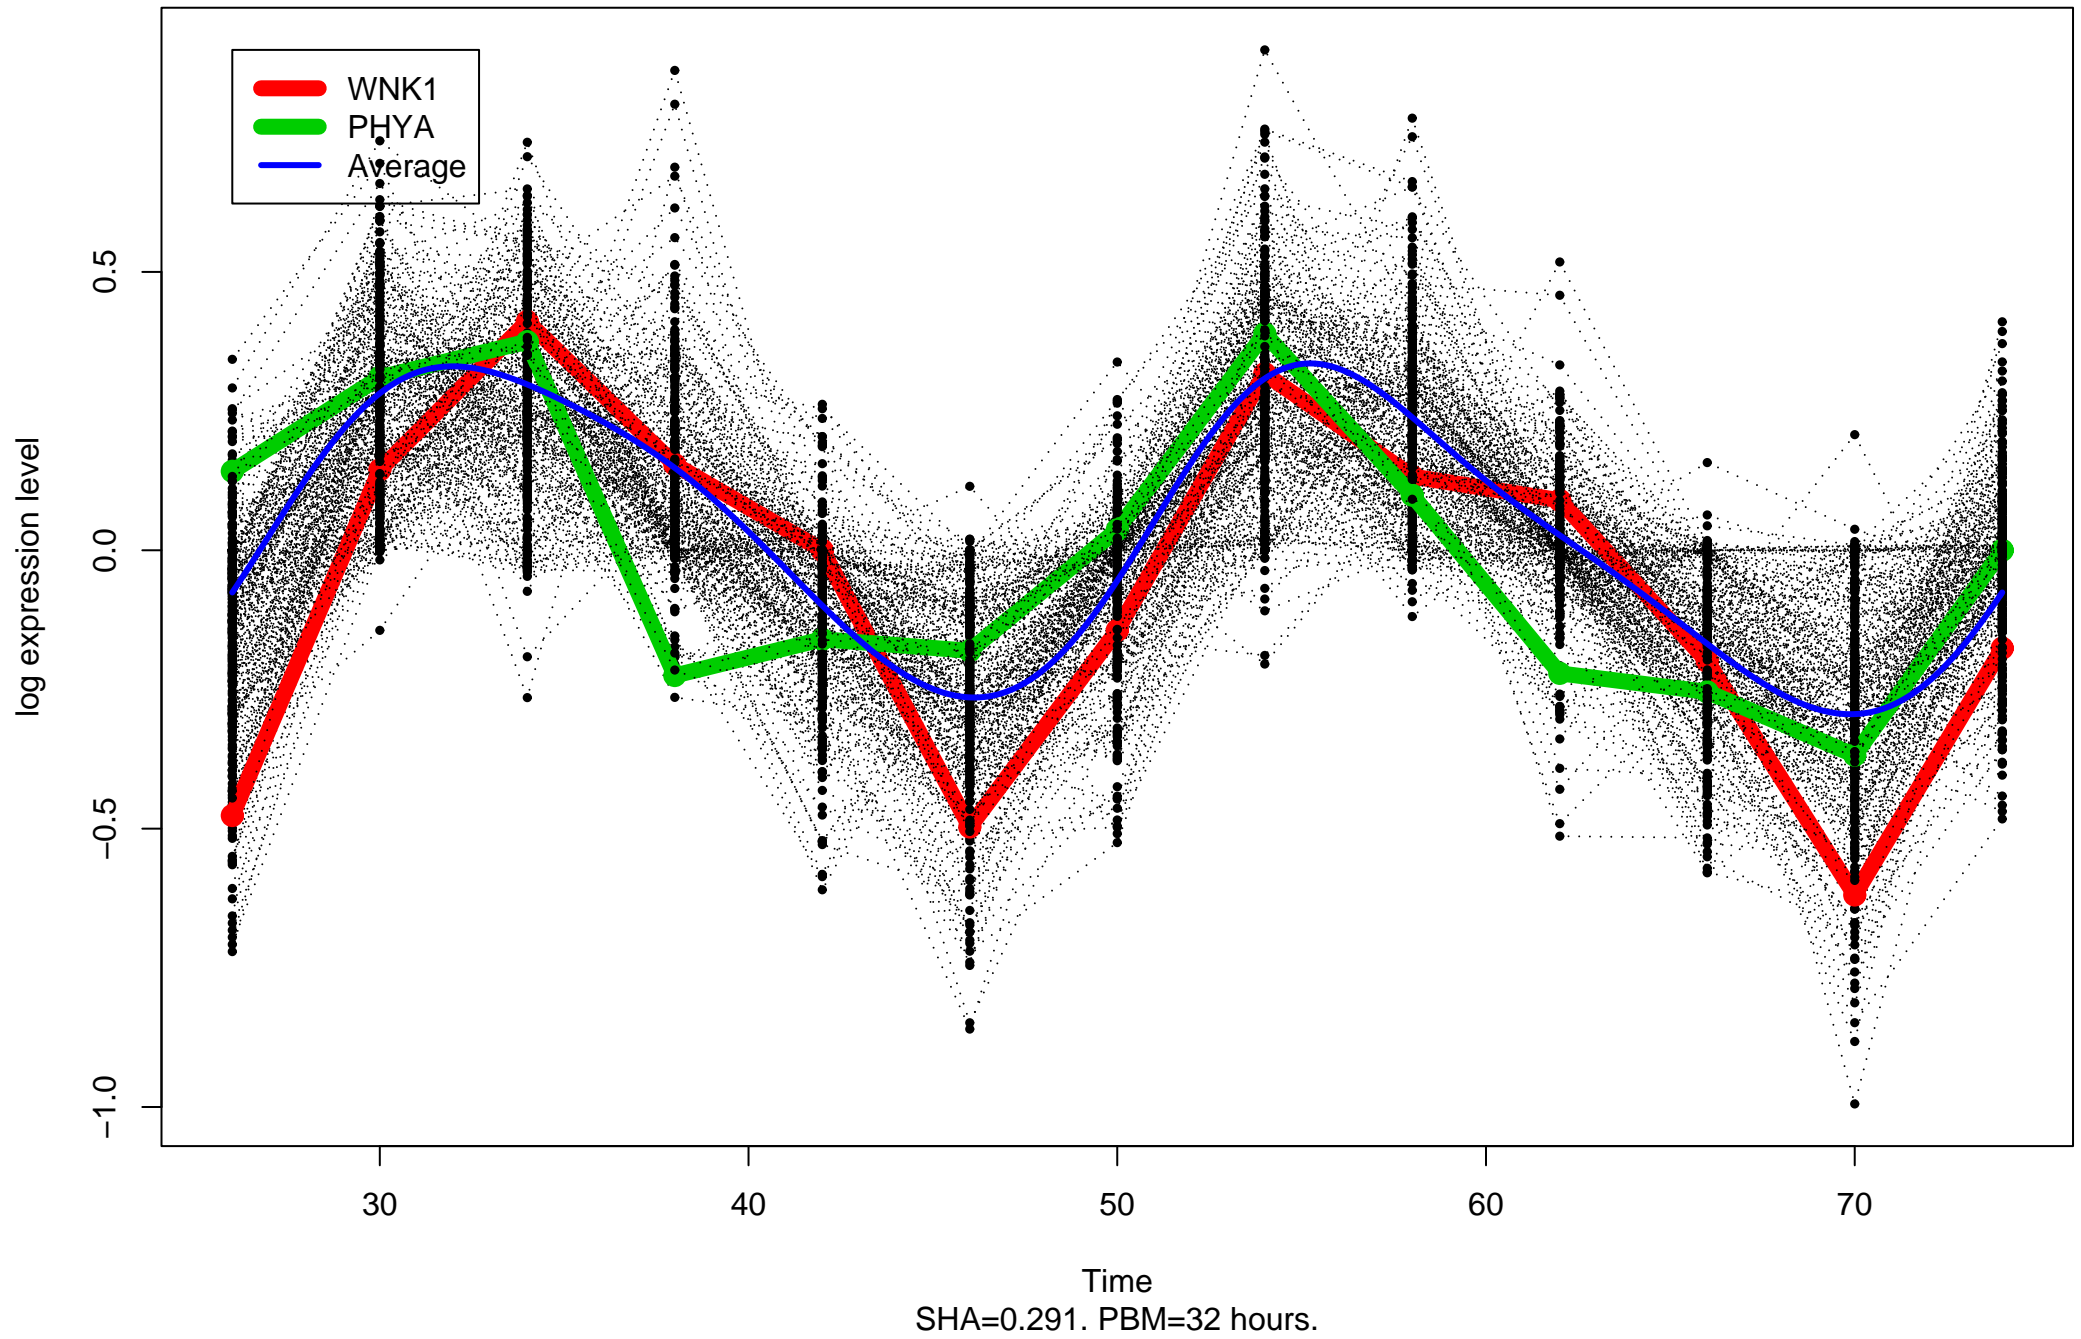

Cluster 10 (98 genes). SHR=0.555.

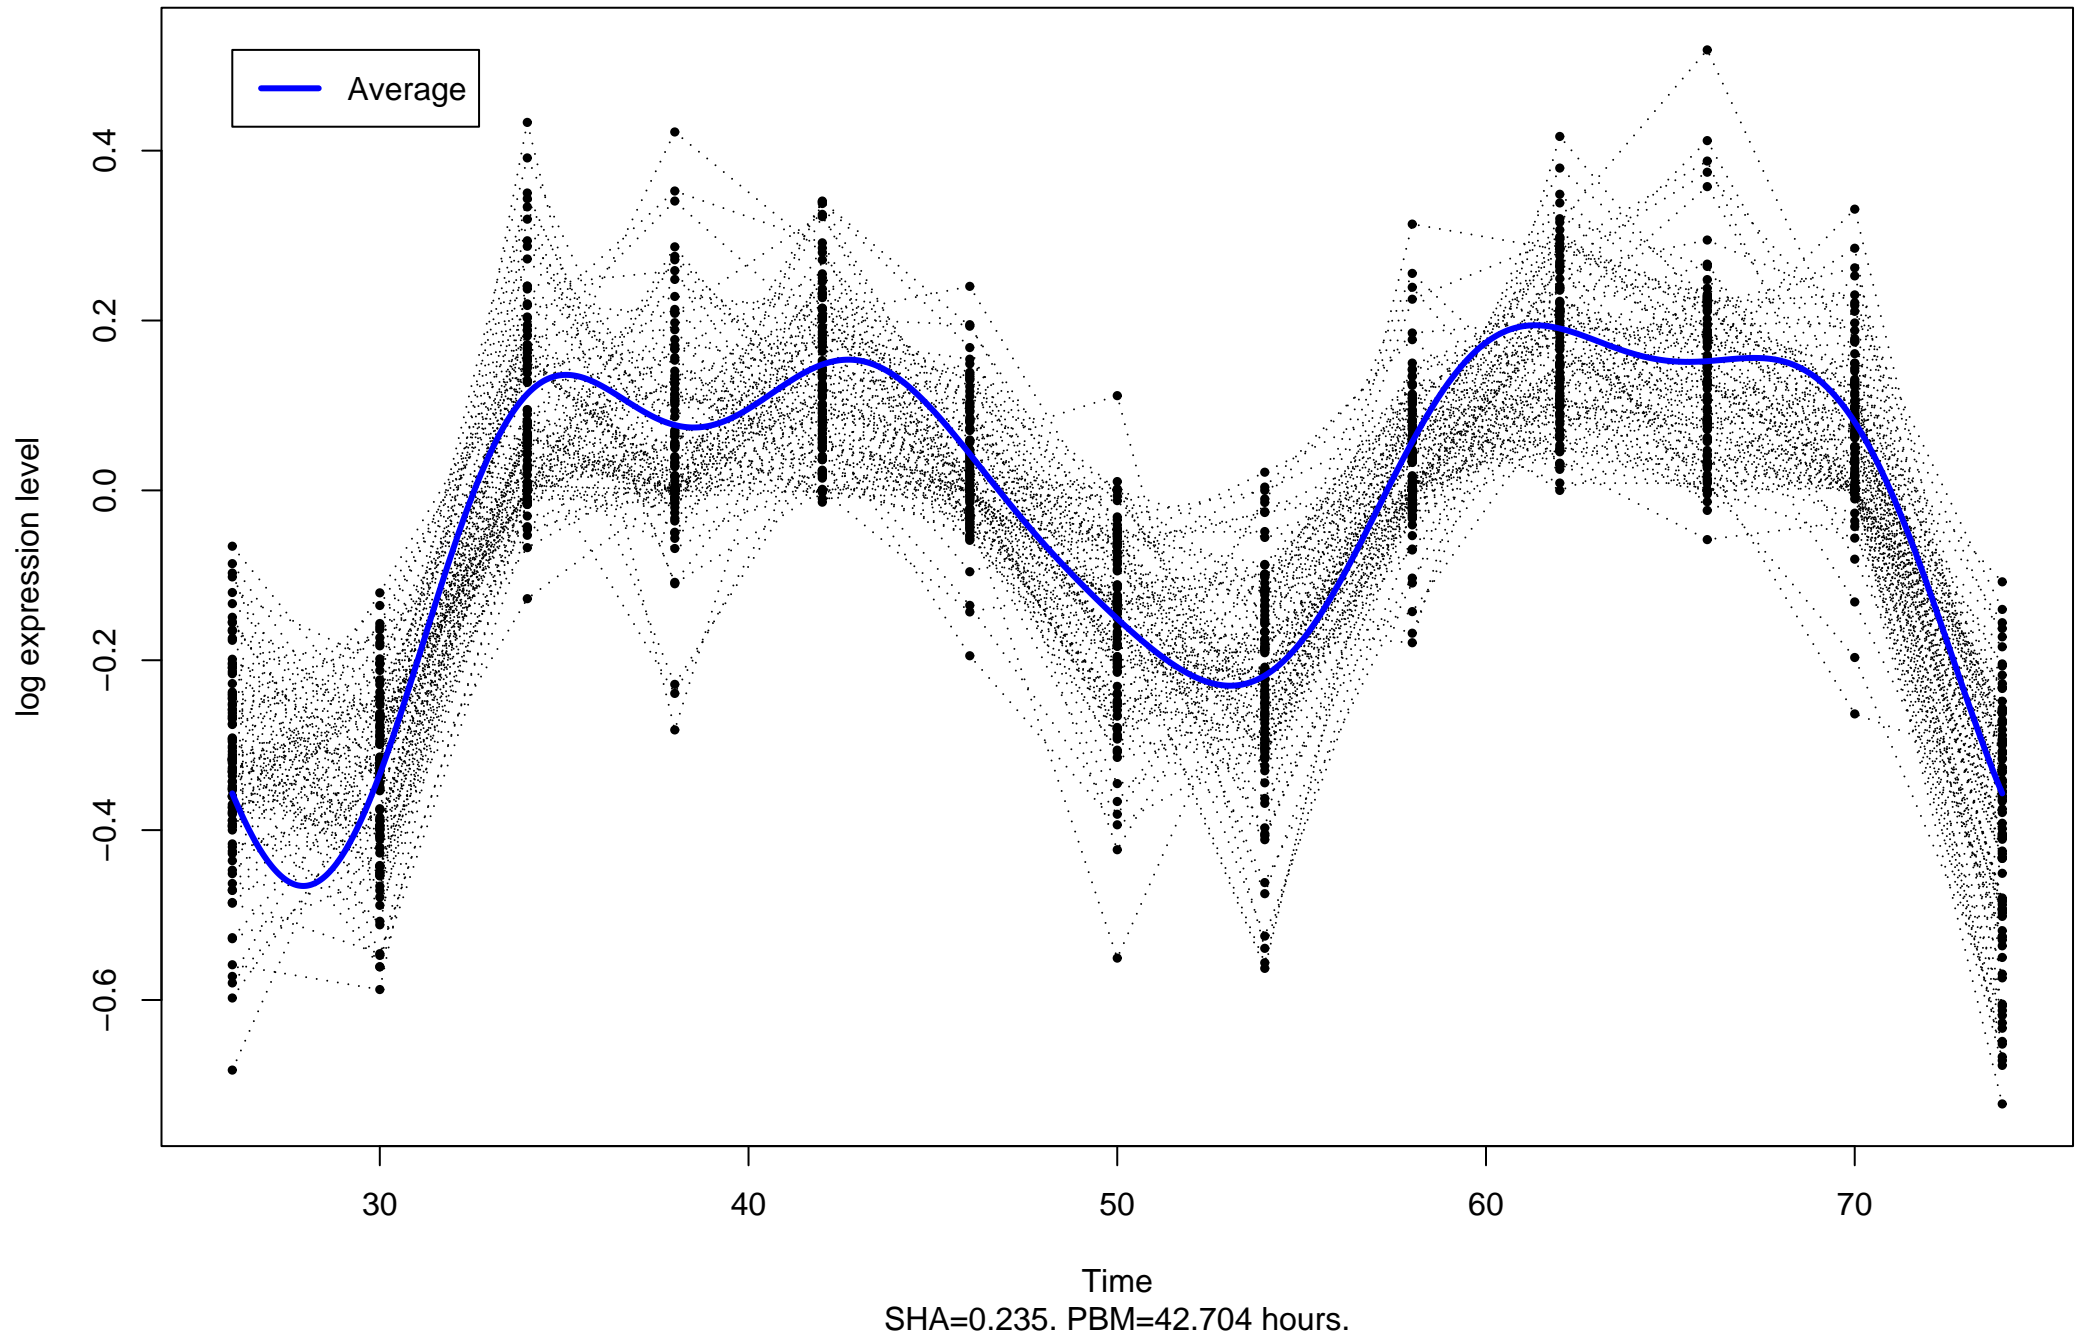

Cluster 11 (46 genes). SHR=0.665.

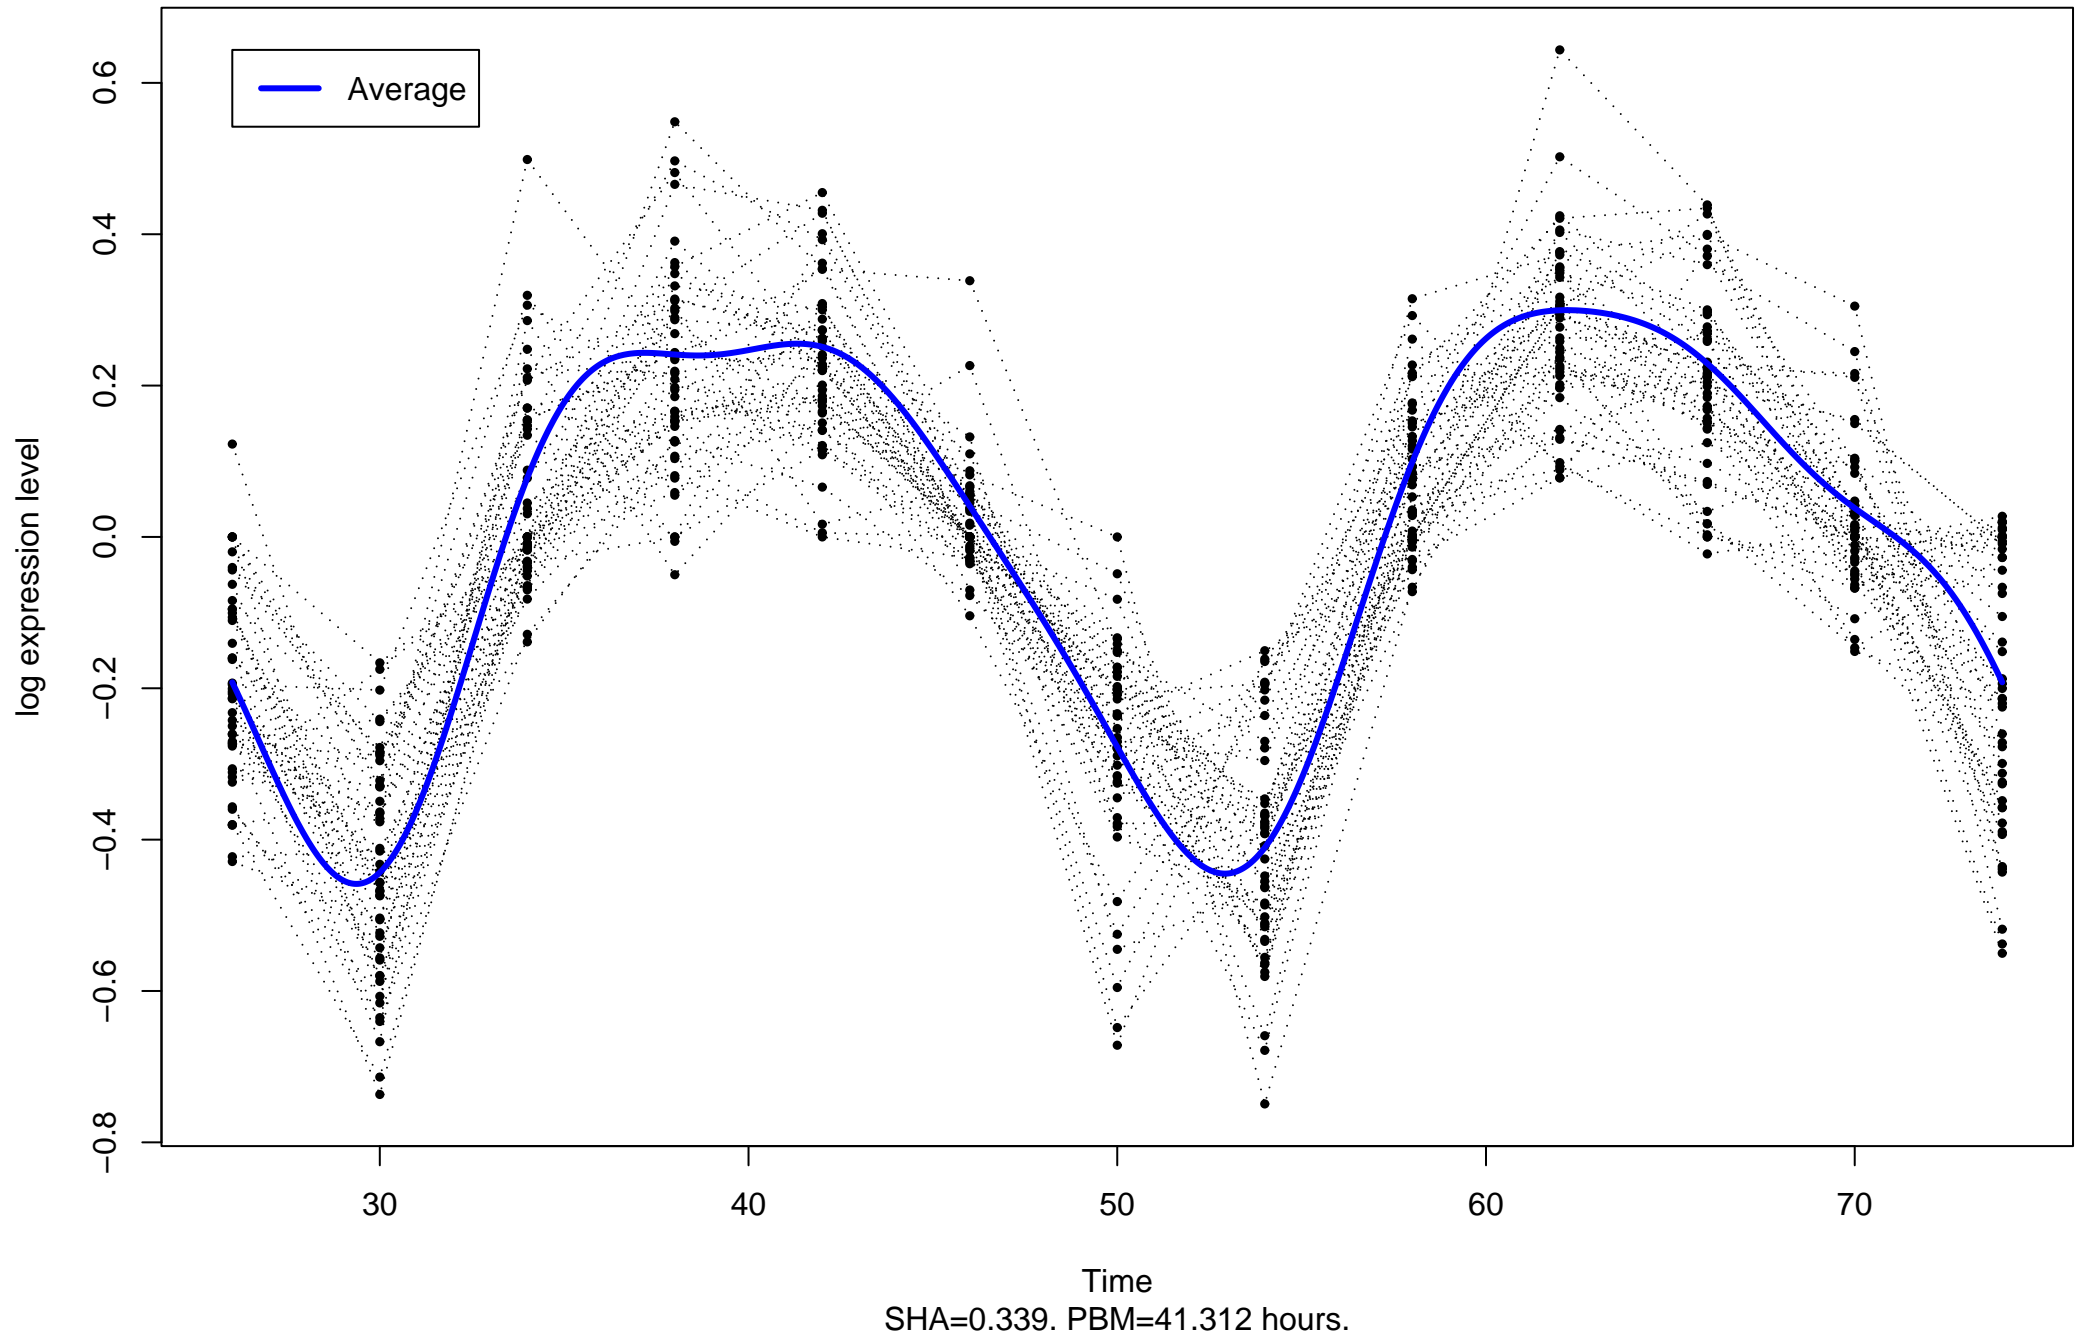

Cluster 12 (47 genes). SHR=0.46.

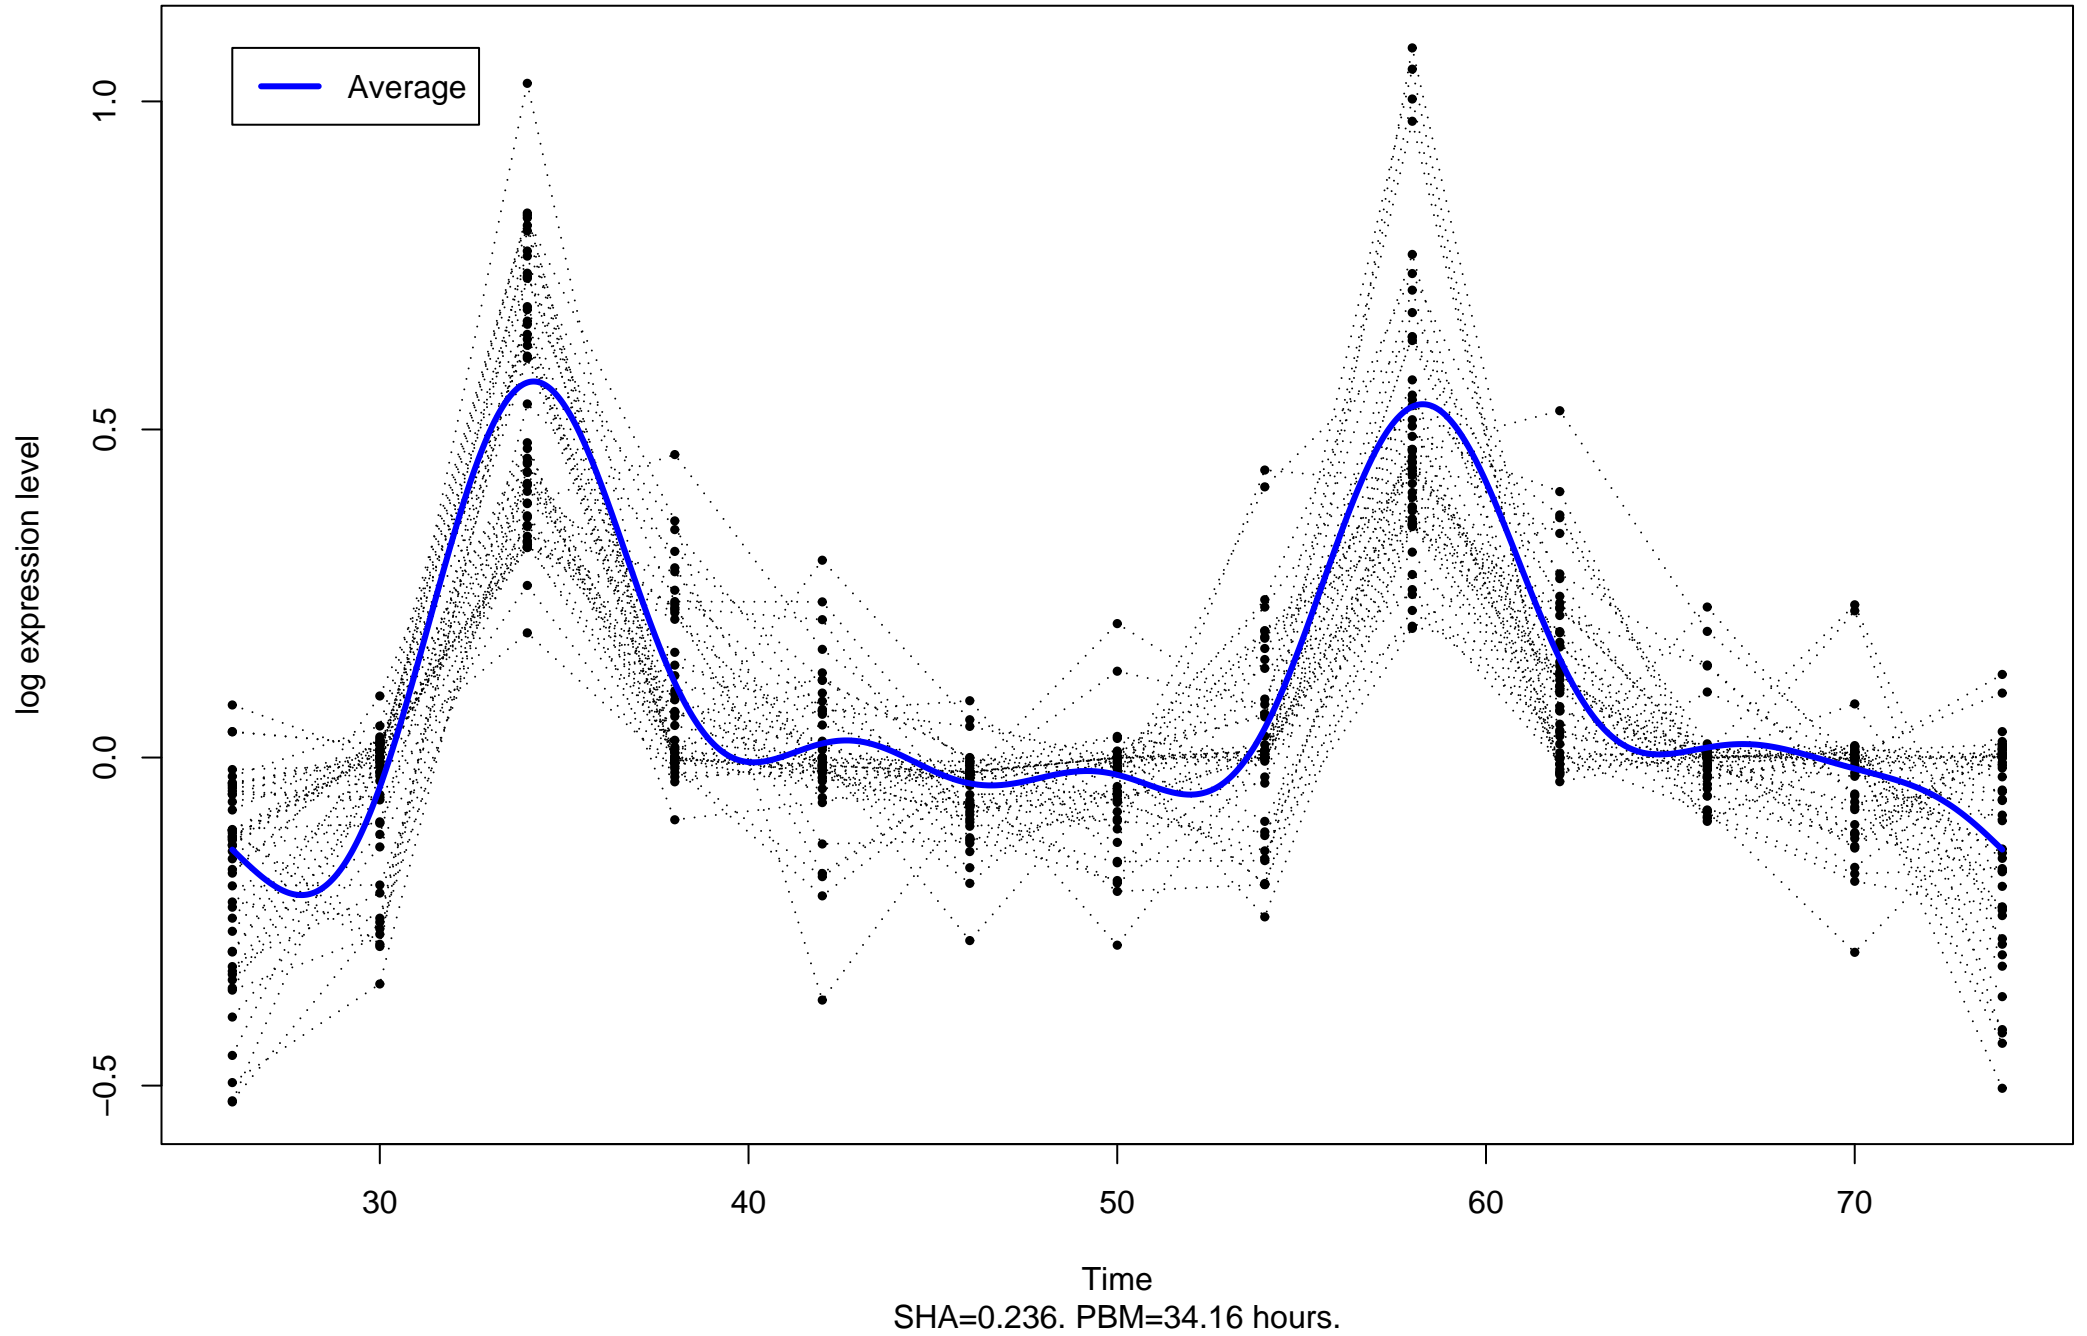

Cluster 13 (60 genes). SHR=0.713.

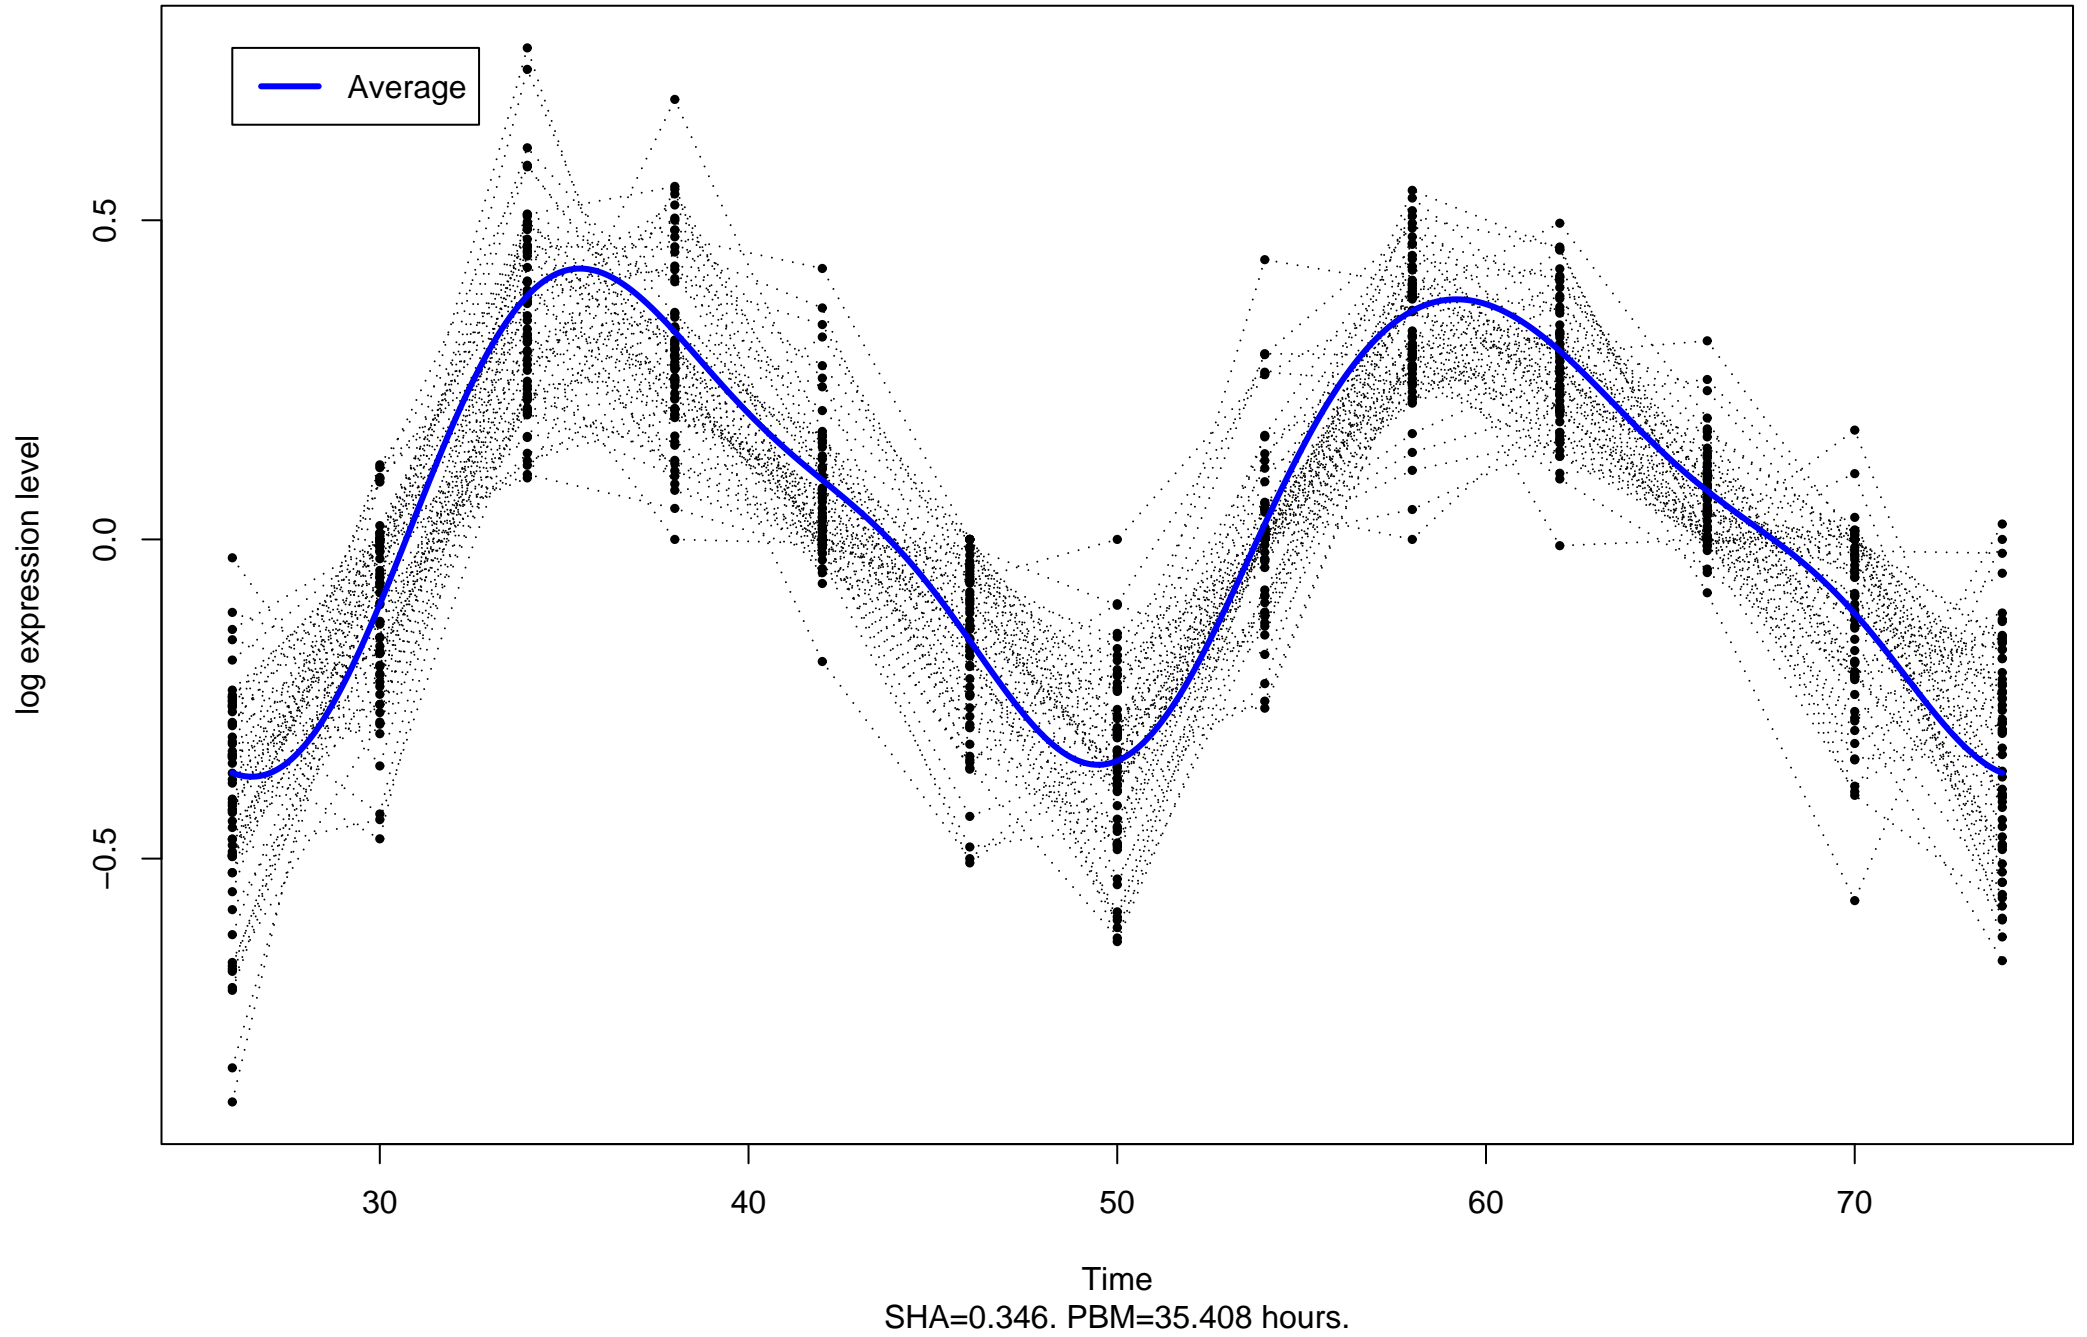

Cluster 14 (325 genes). SHR=0.502.

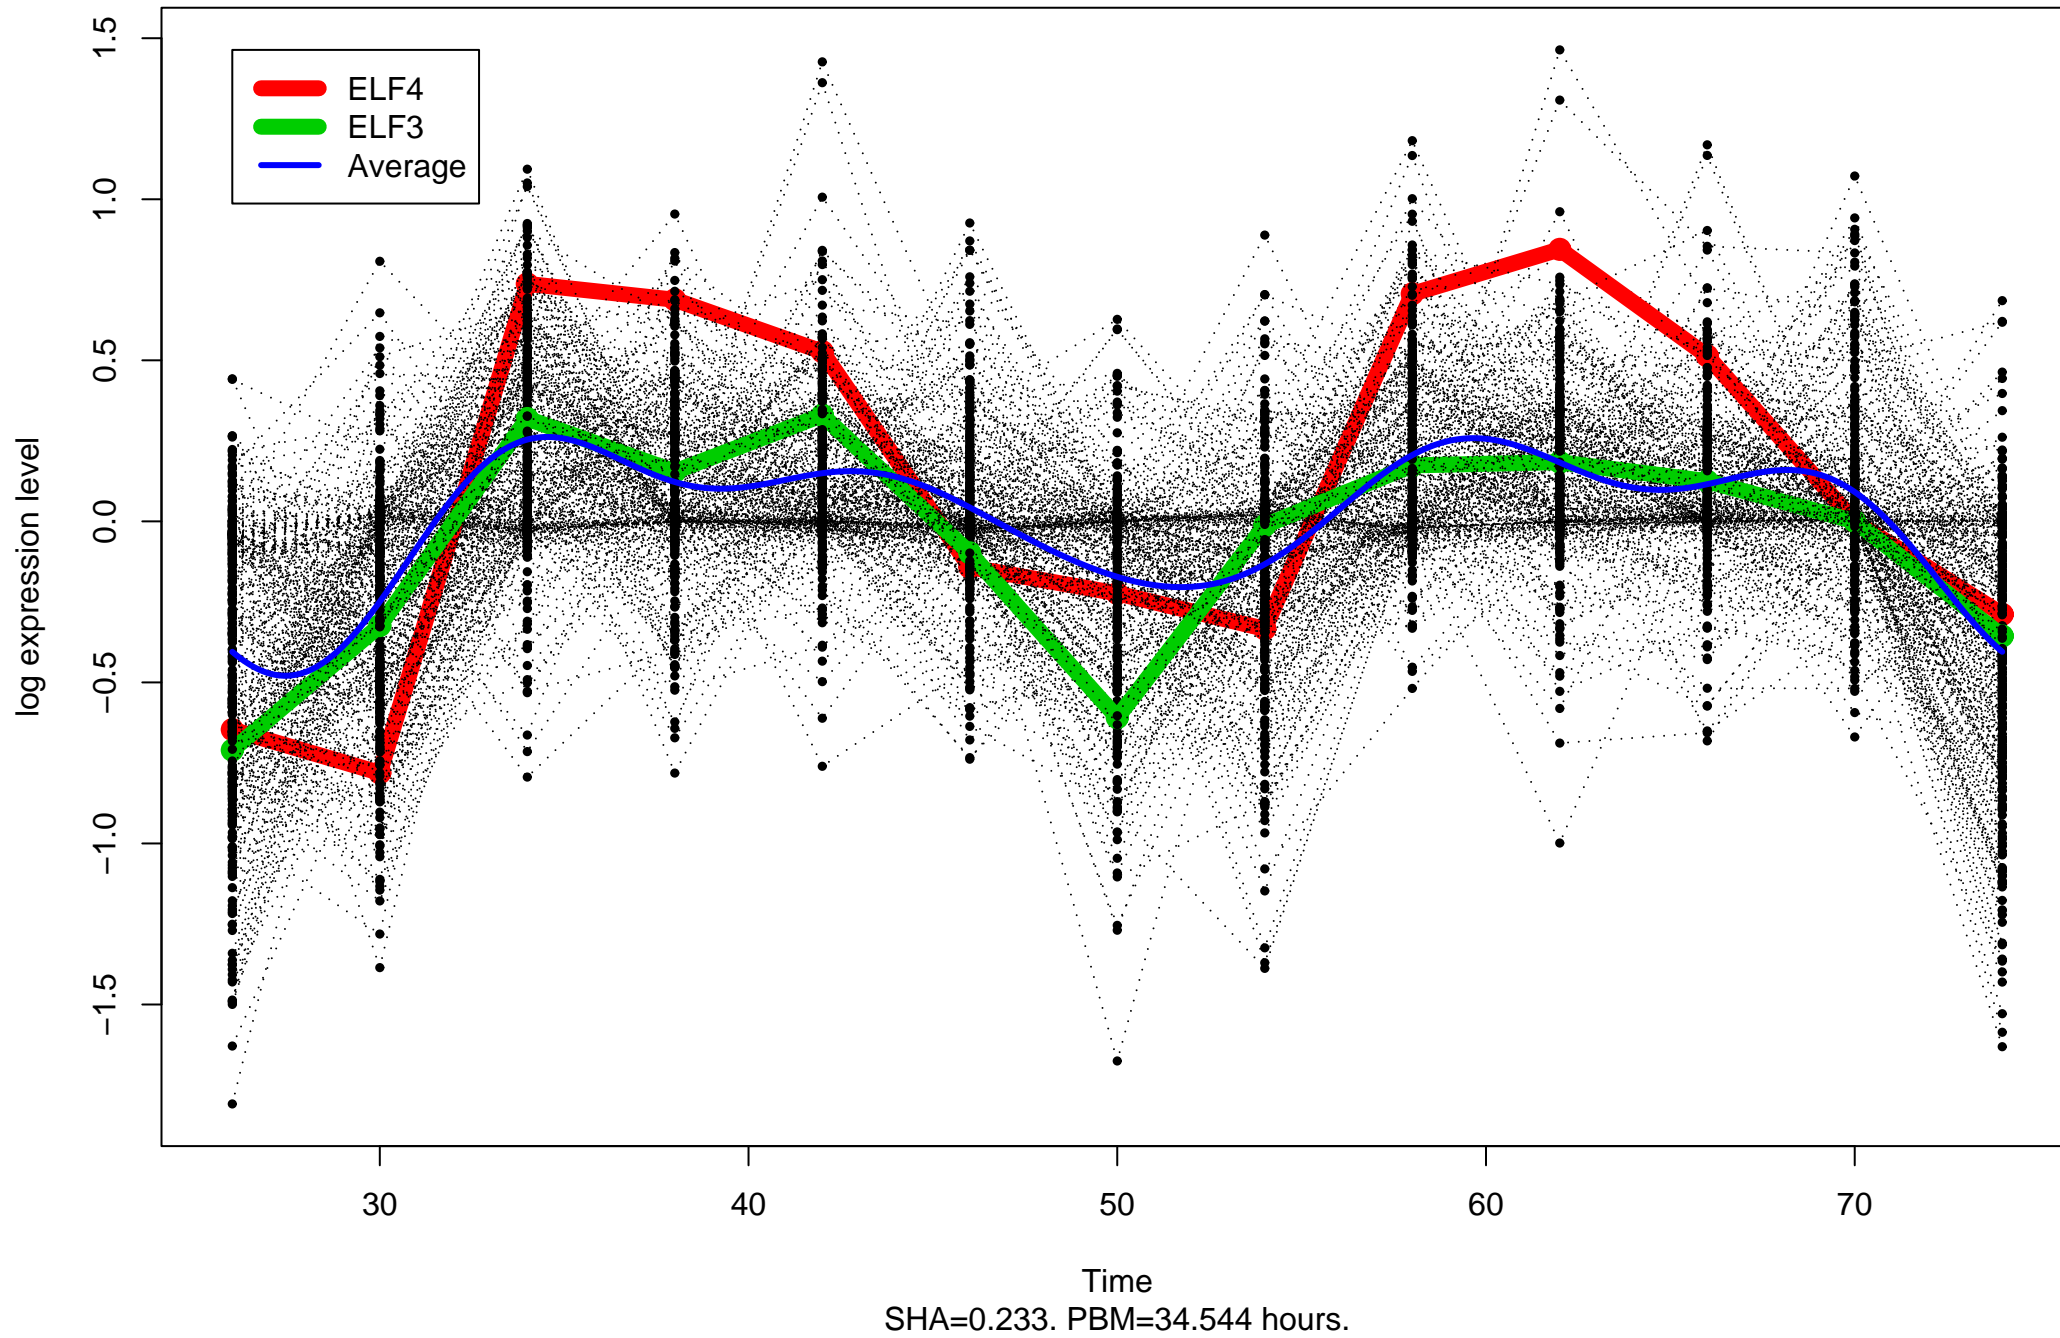

Cluster 15 (26 genes). SHR=0.686.

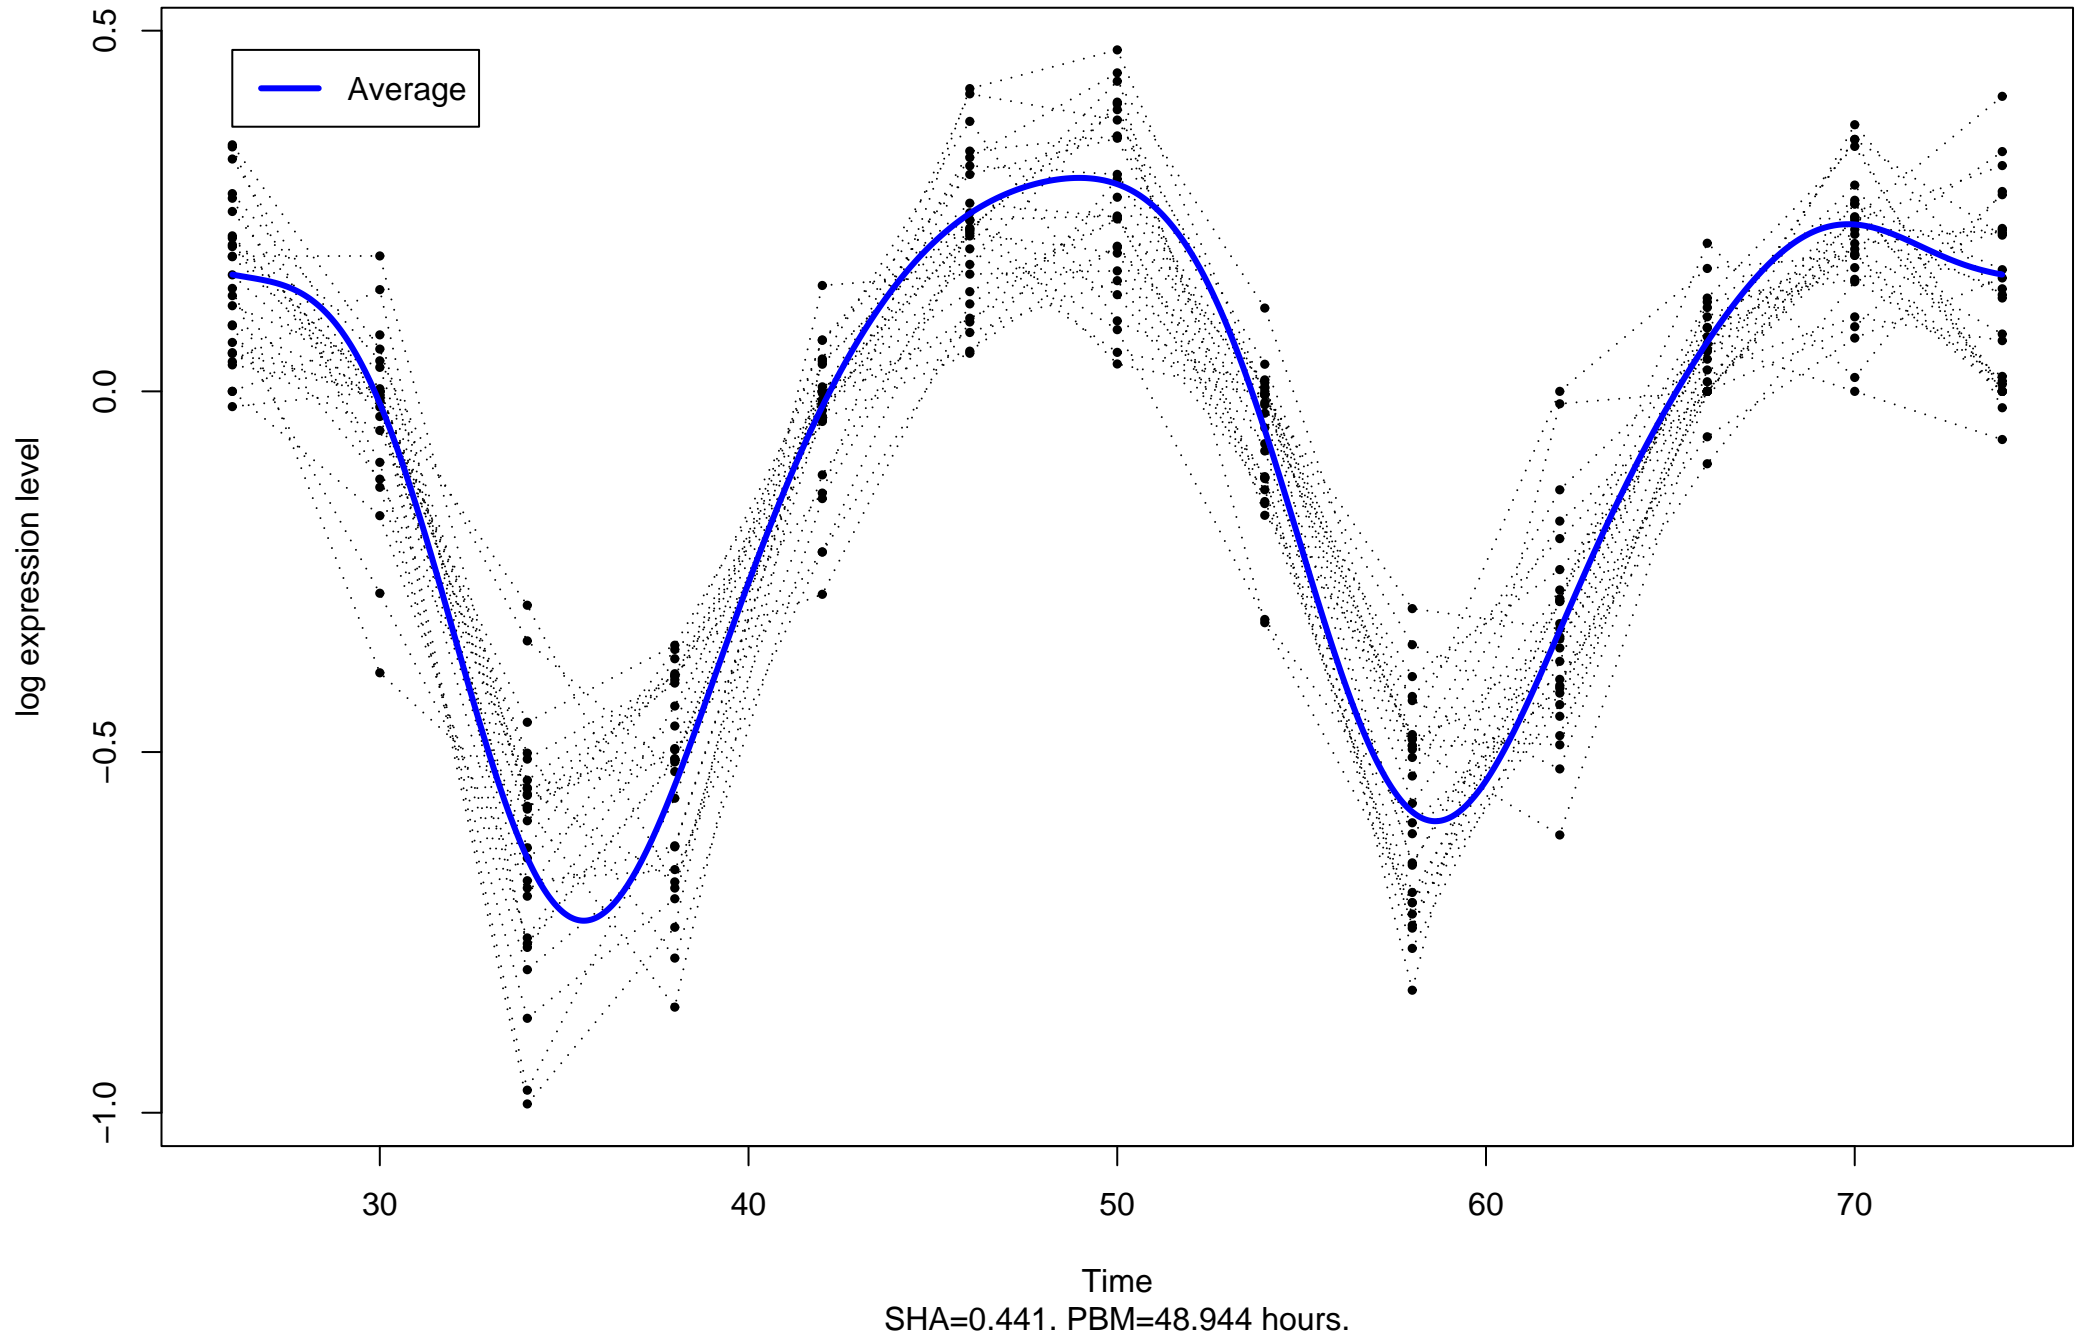

Cluster 16 (63 genes). SHR=0.7.

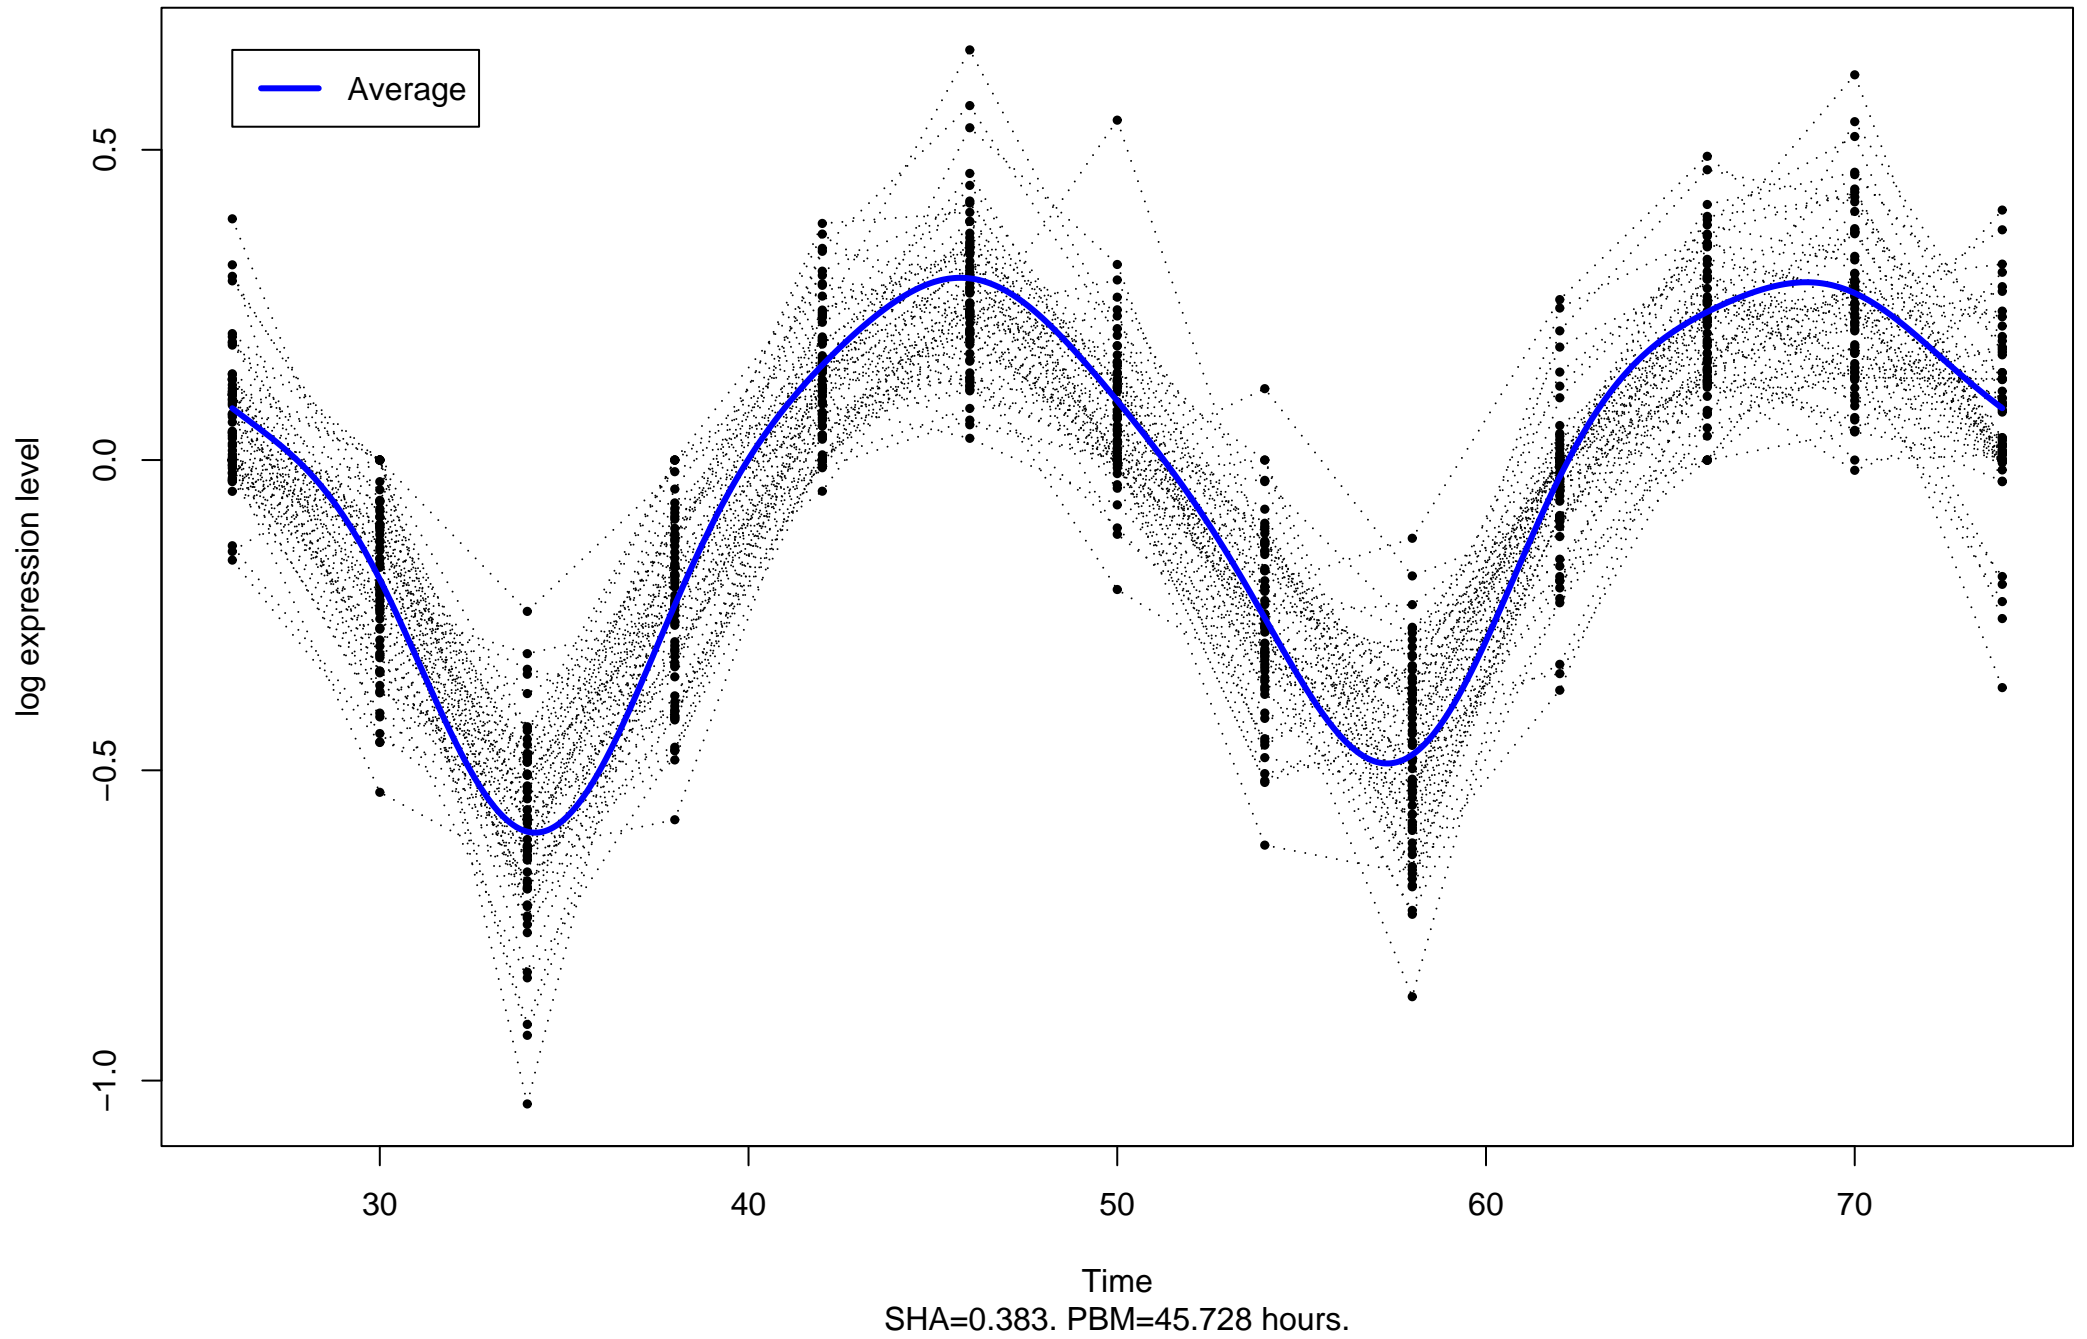



Cluster 17 (126 genes). SHR=0.73.

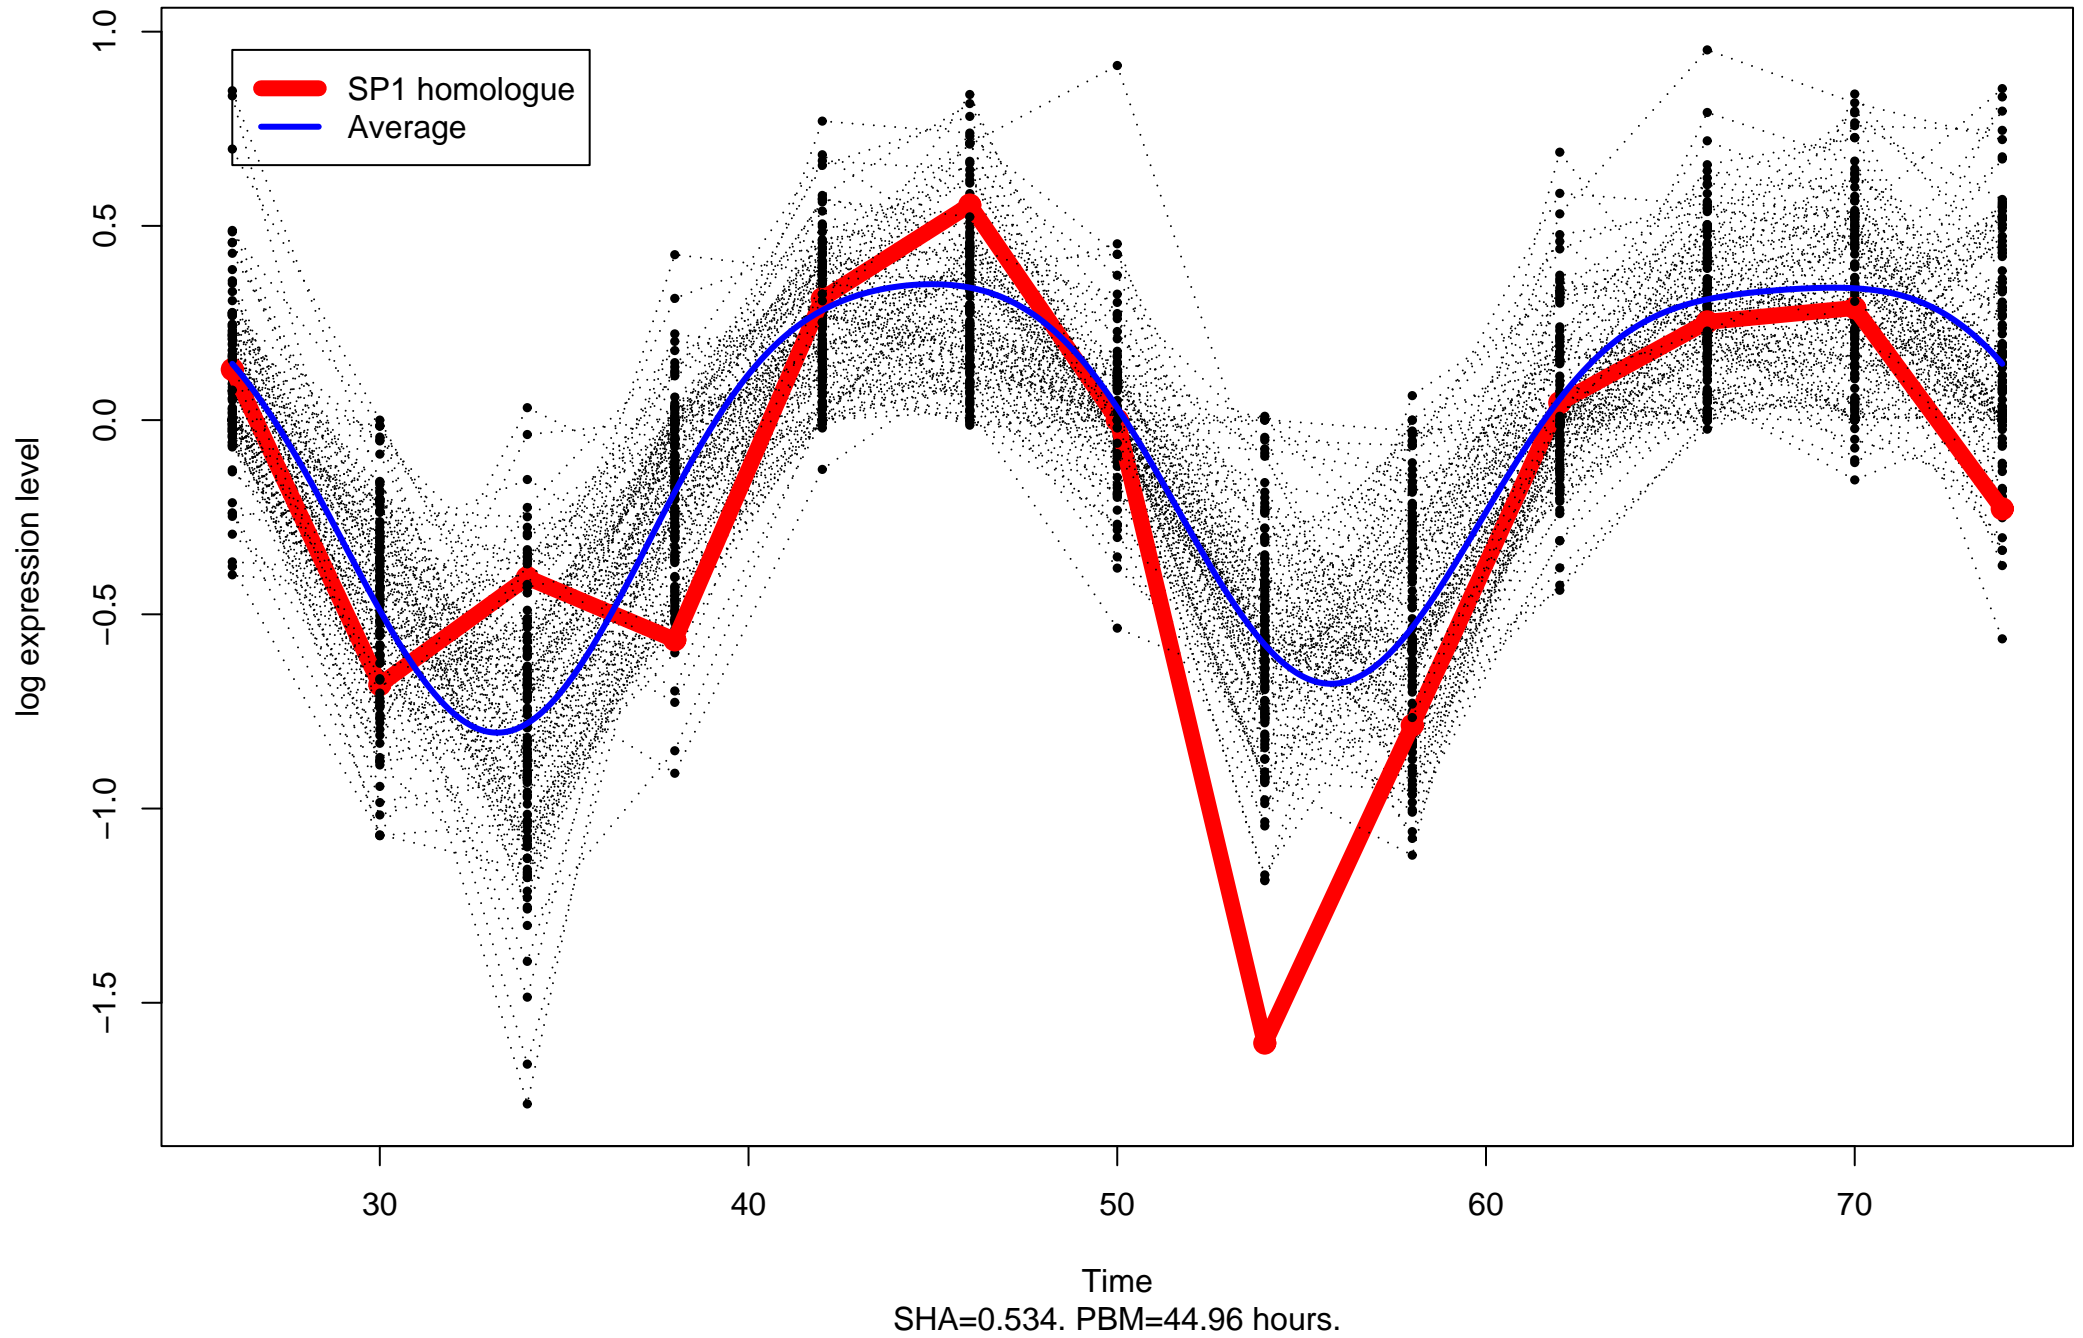

Cluster 18 (59 genes). SHR=0.76.

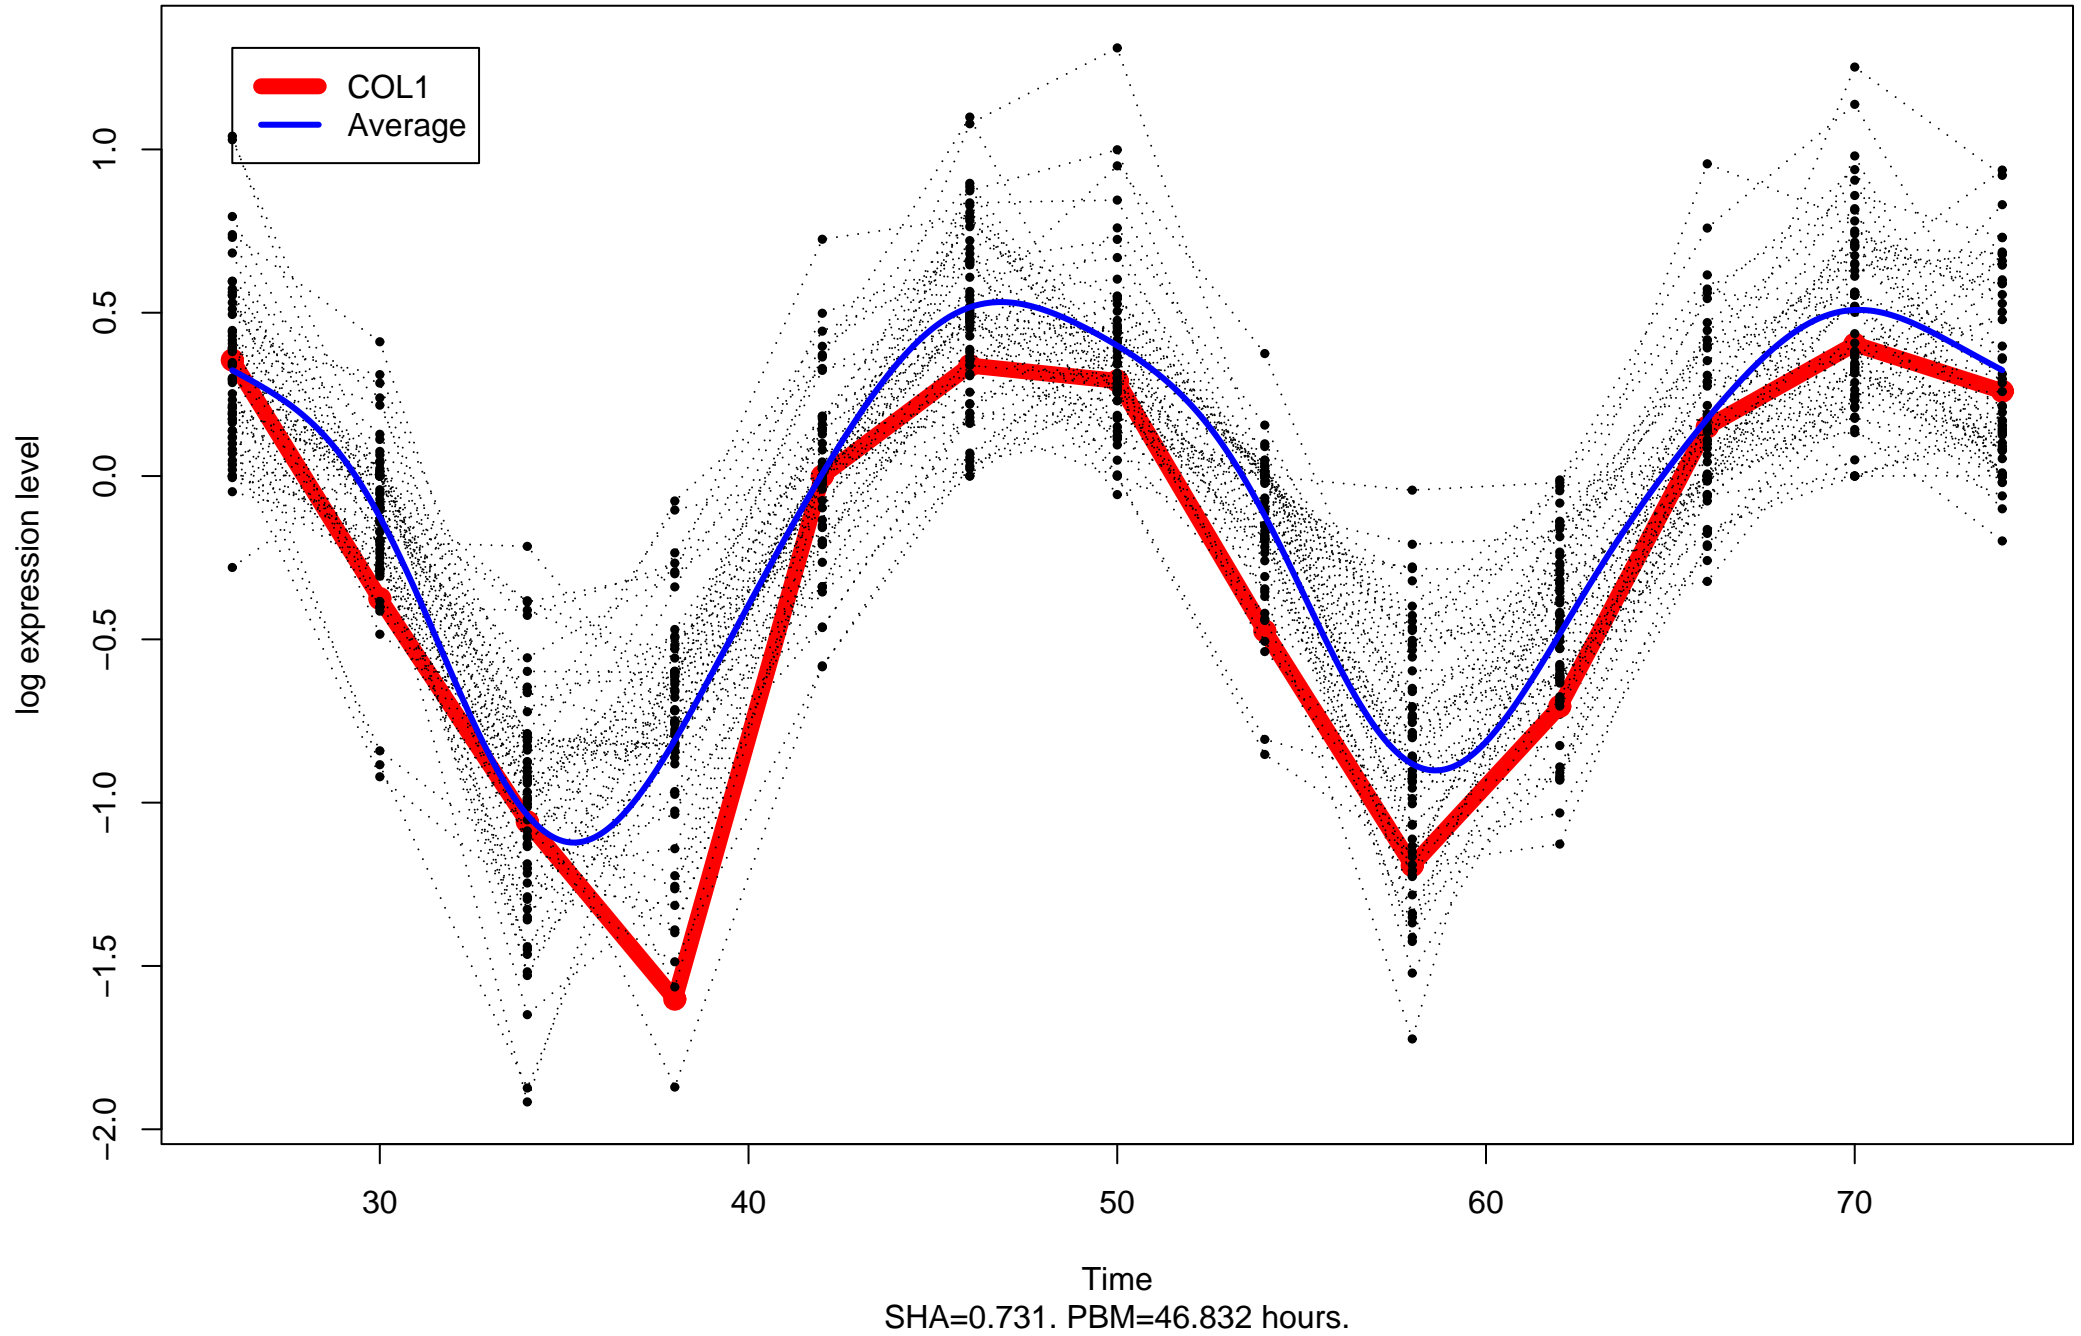

Cluster 19 (20 genes). SHR=0.668.

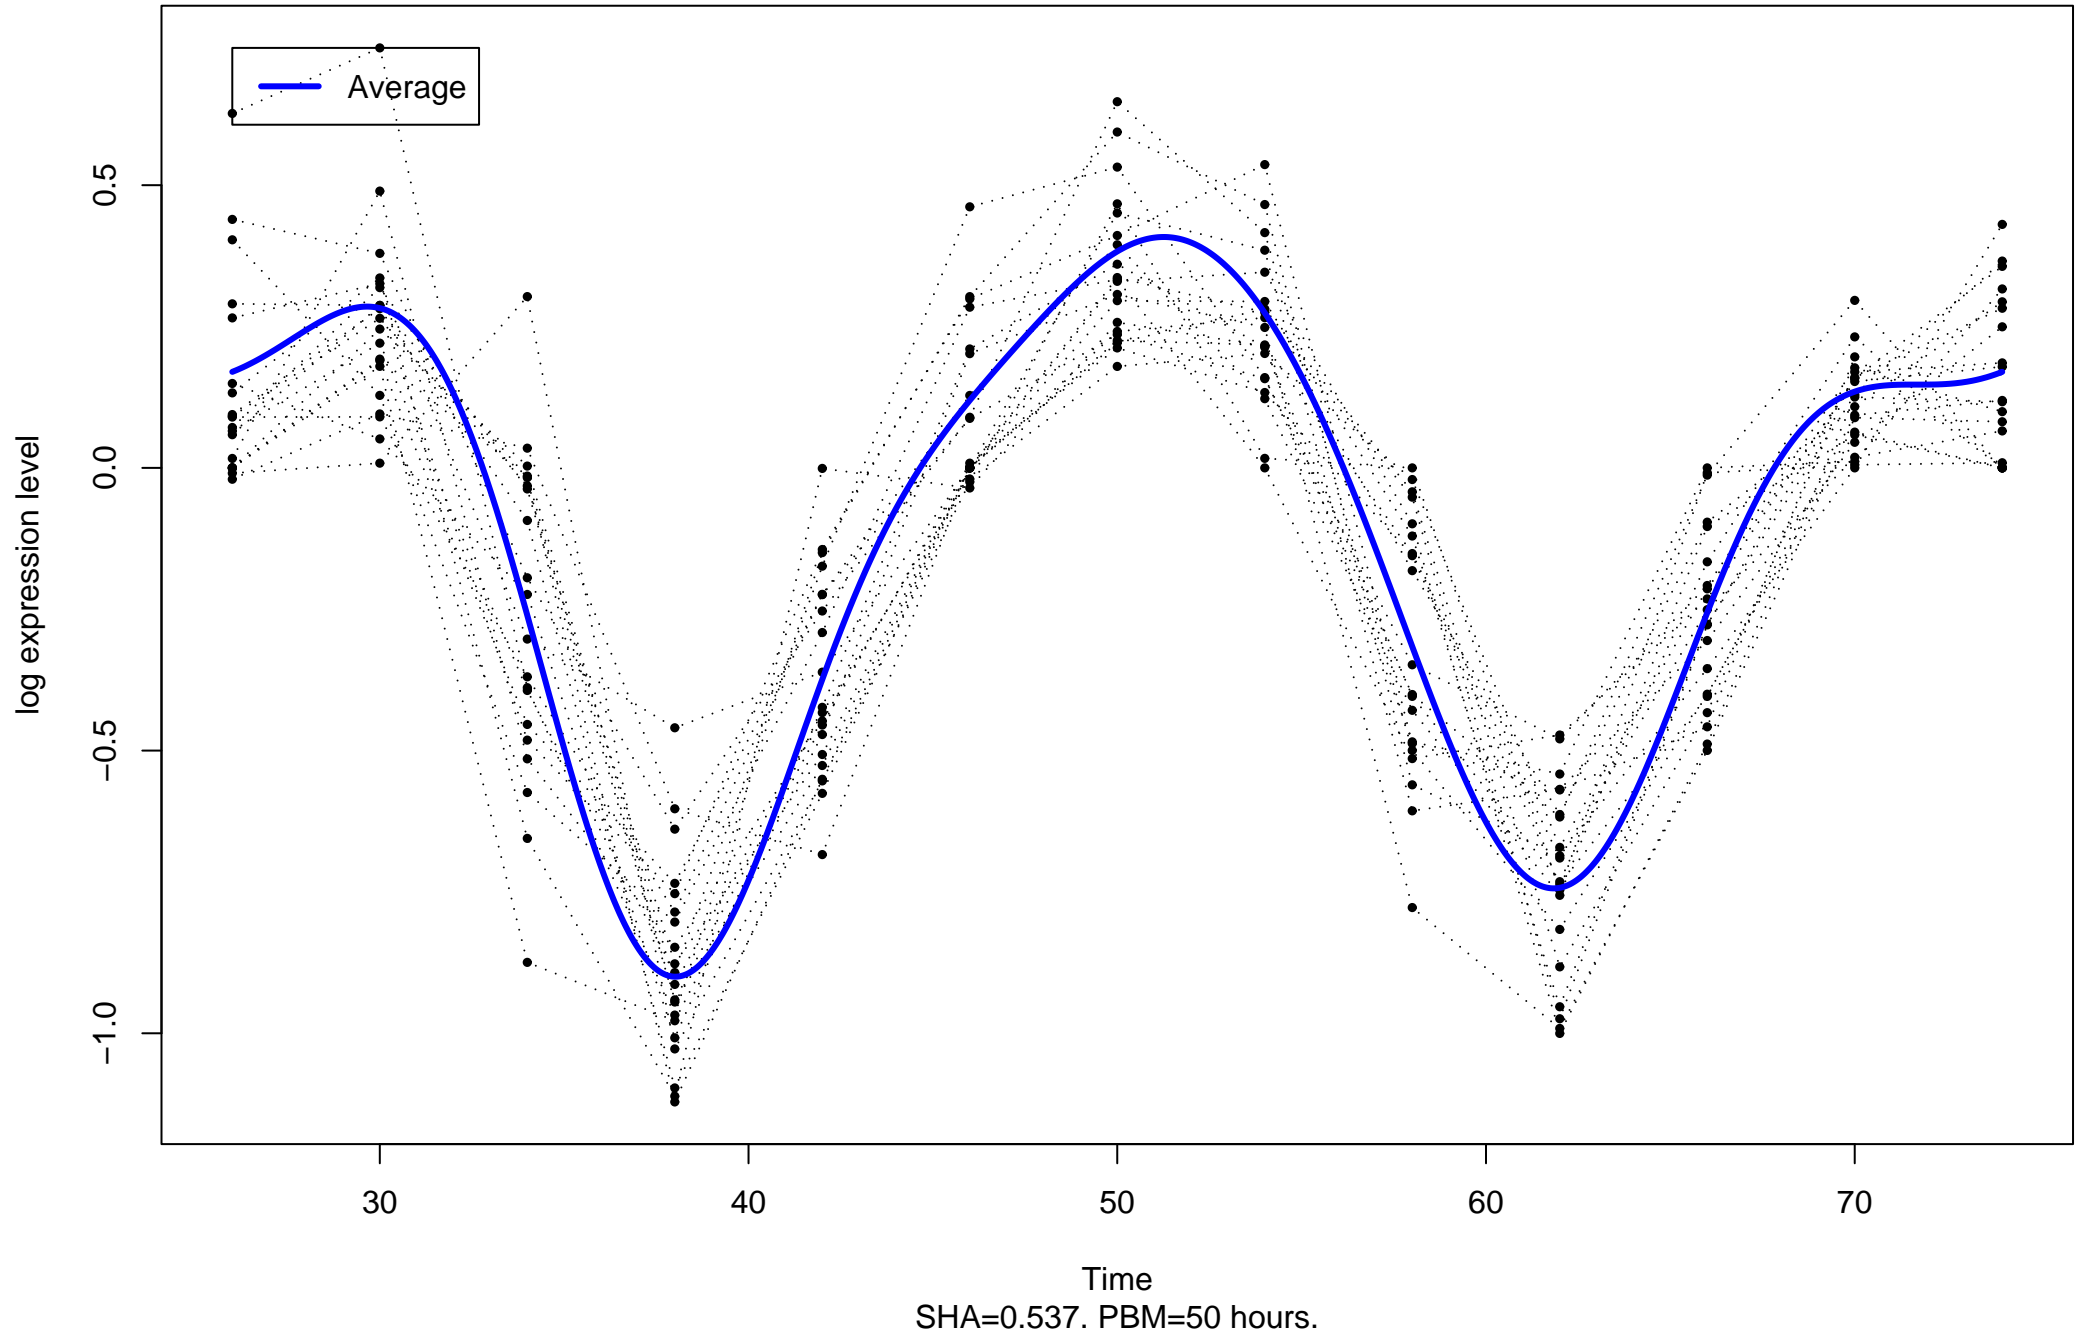

Cluster 20 (24 genes). SHR=0.802.

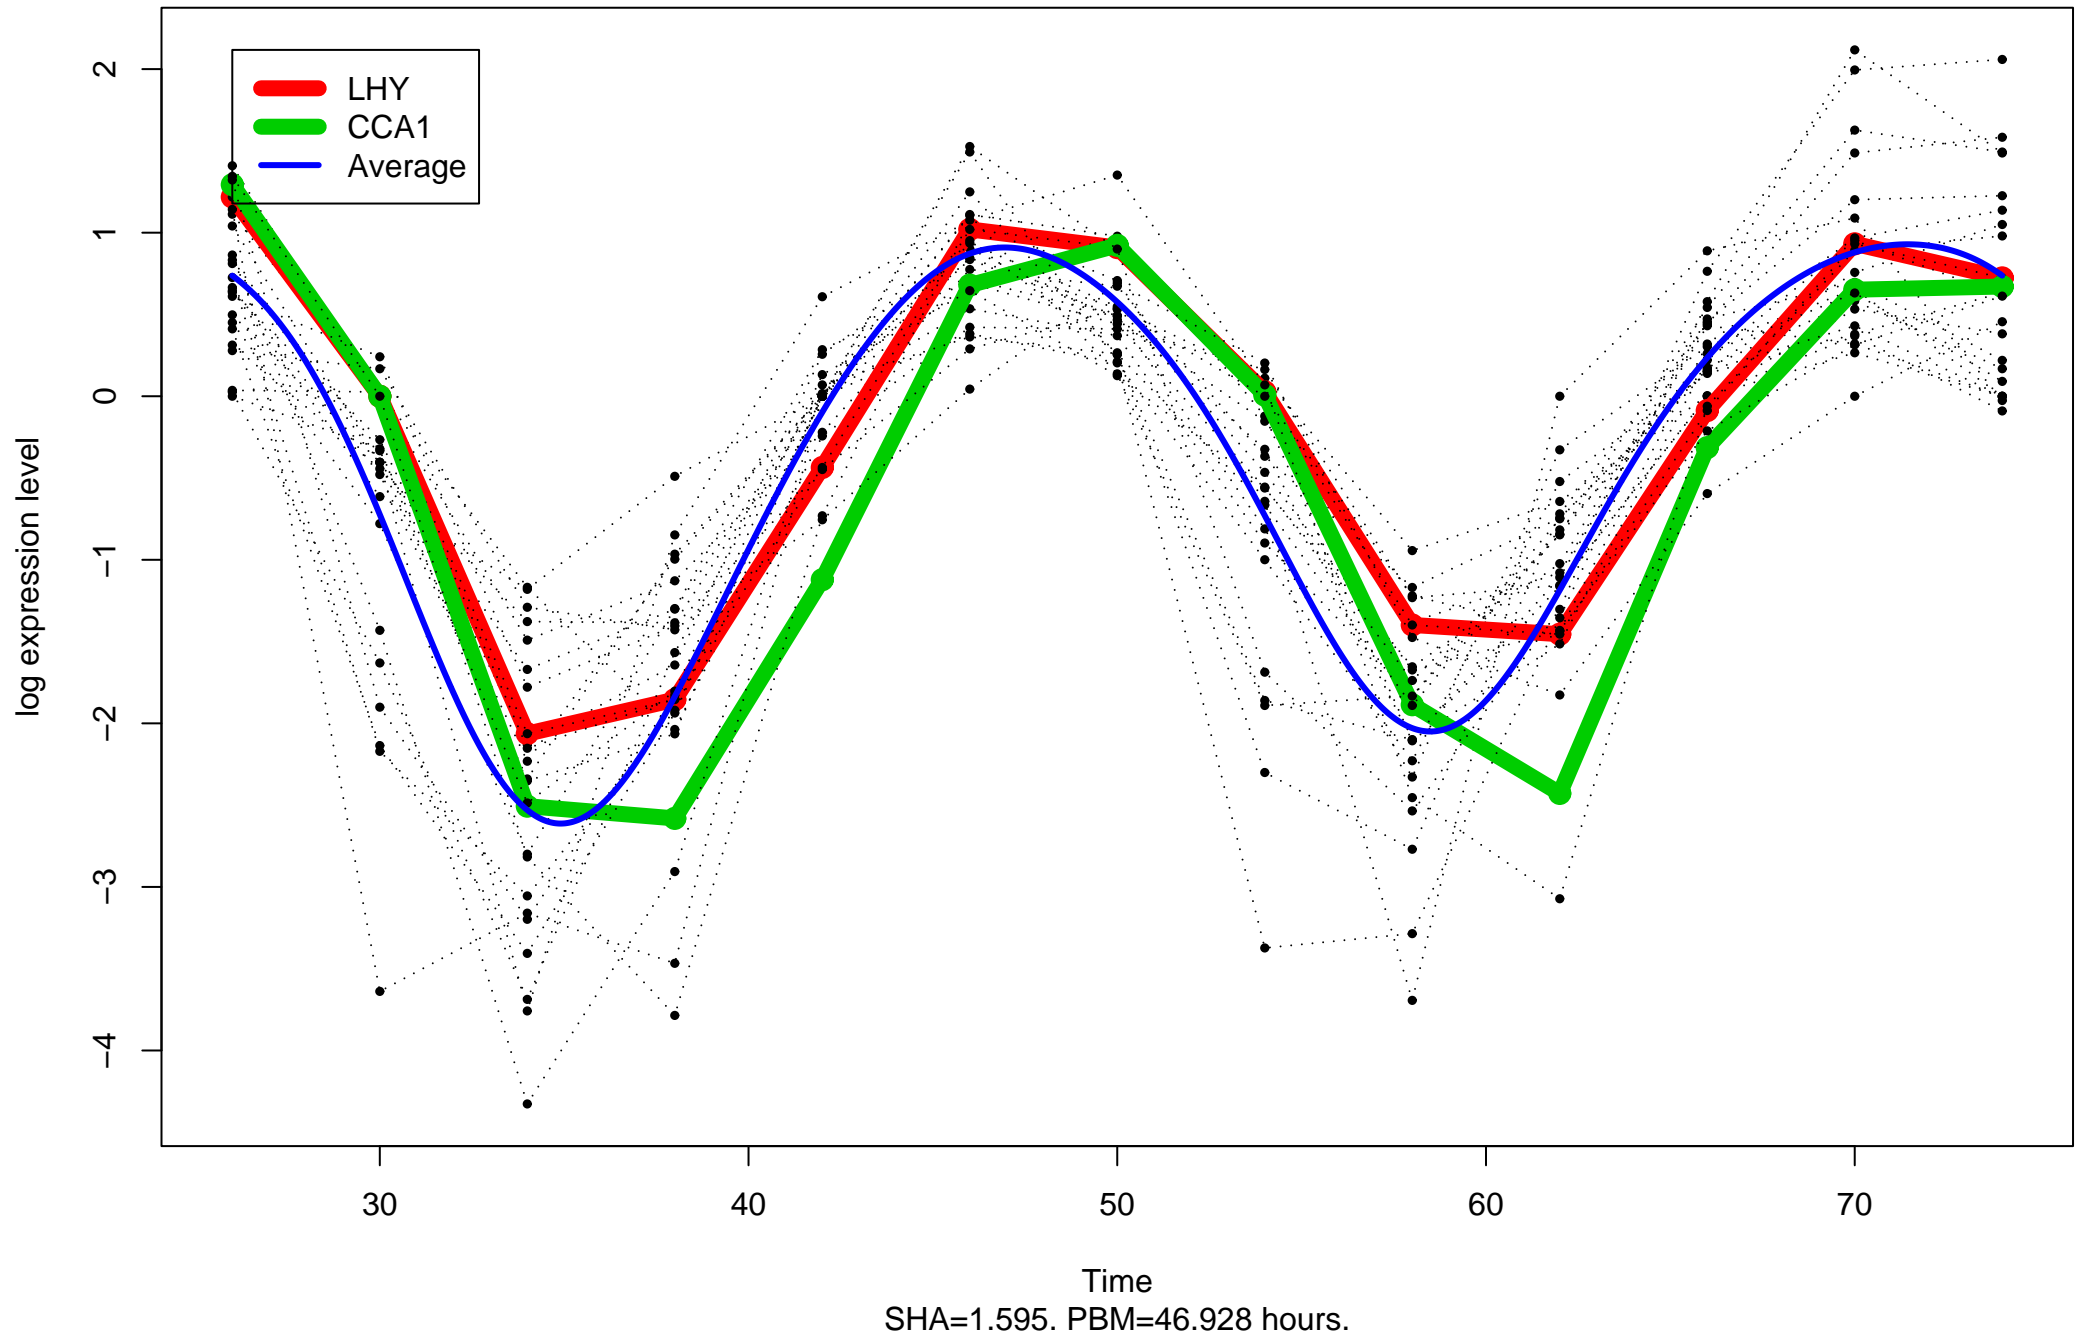

Cluster 21 (34 genes). SHR=0.702.

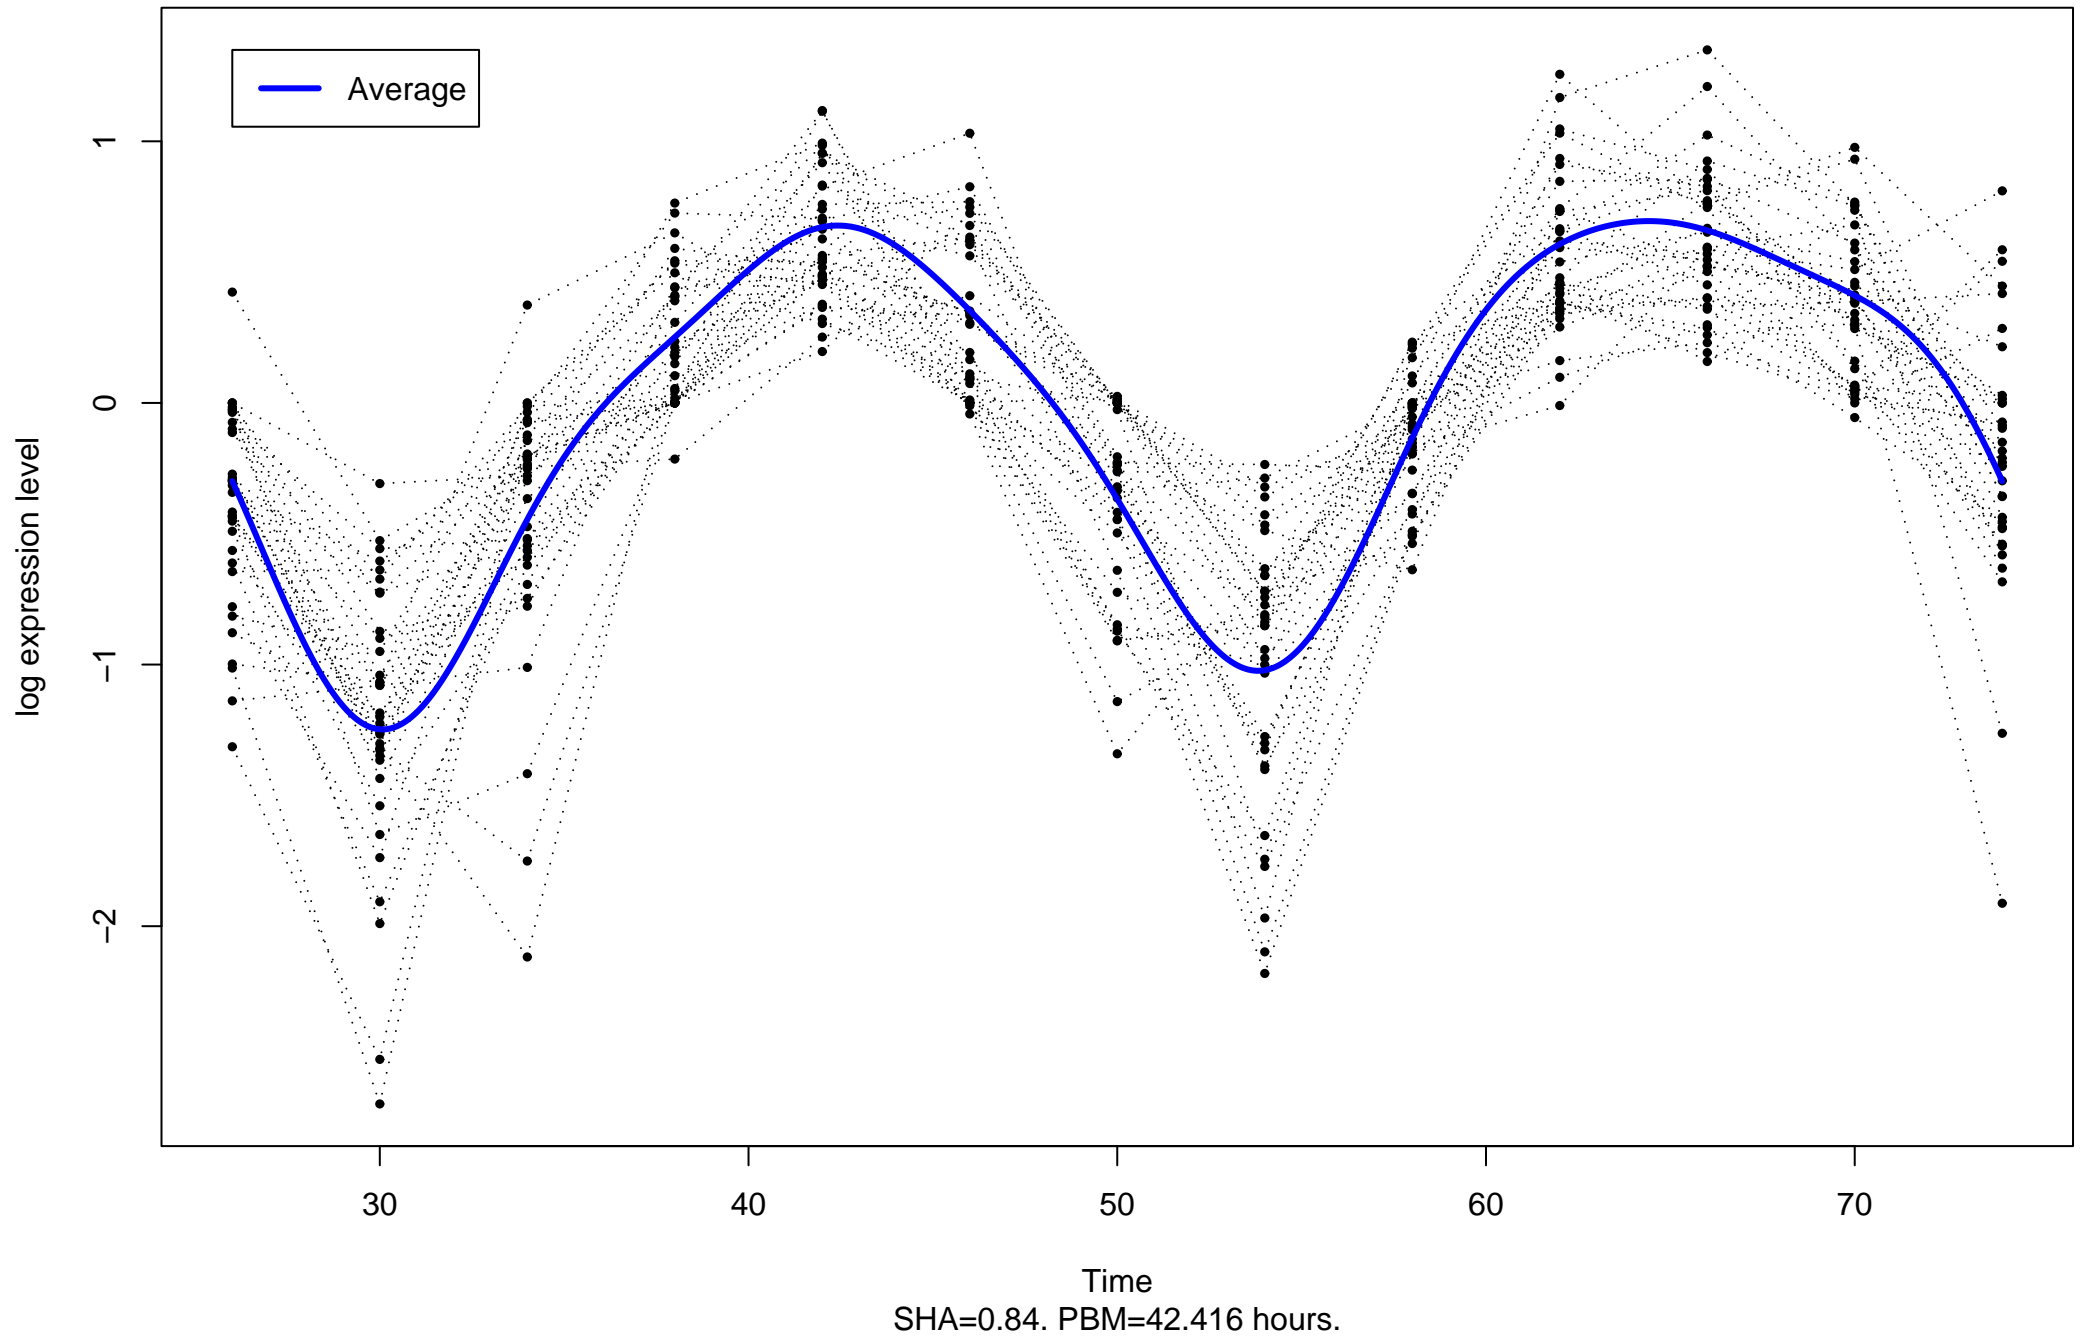

Cluster 22 (58 genes). SHR=0.762.

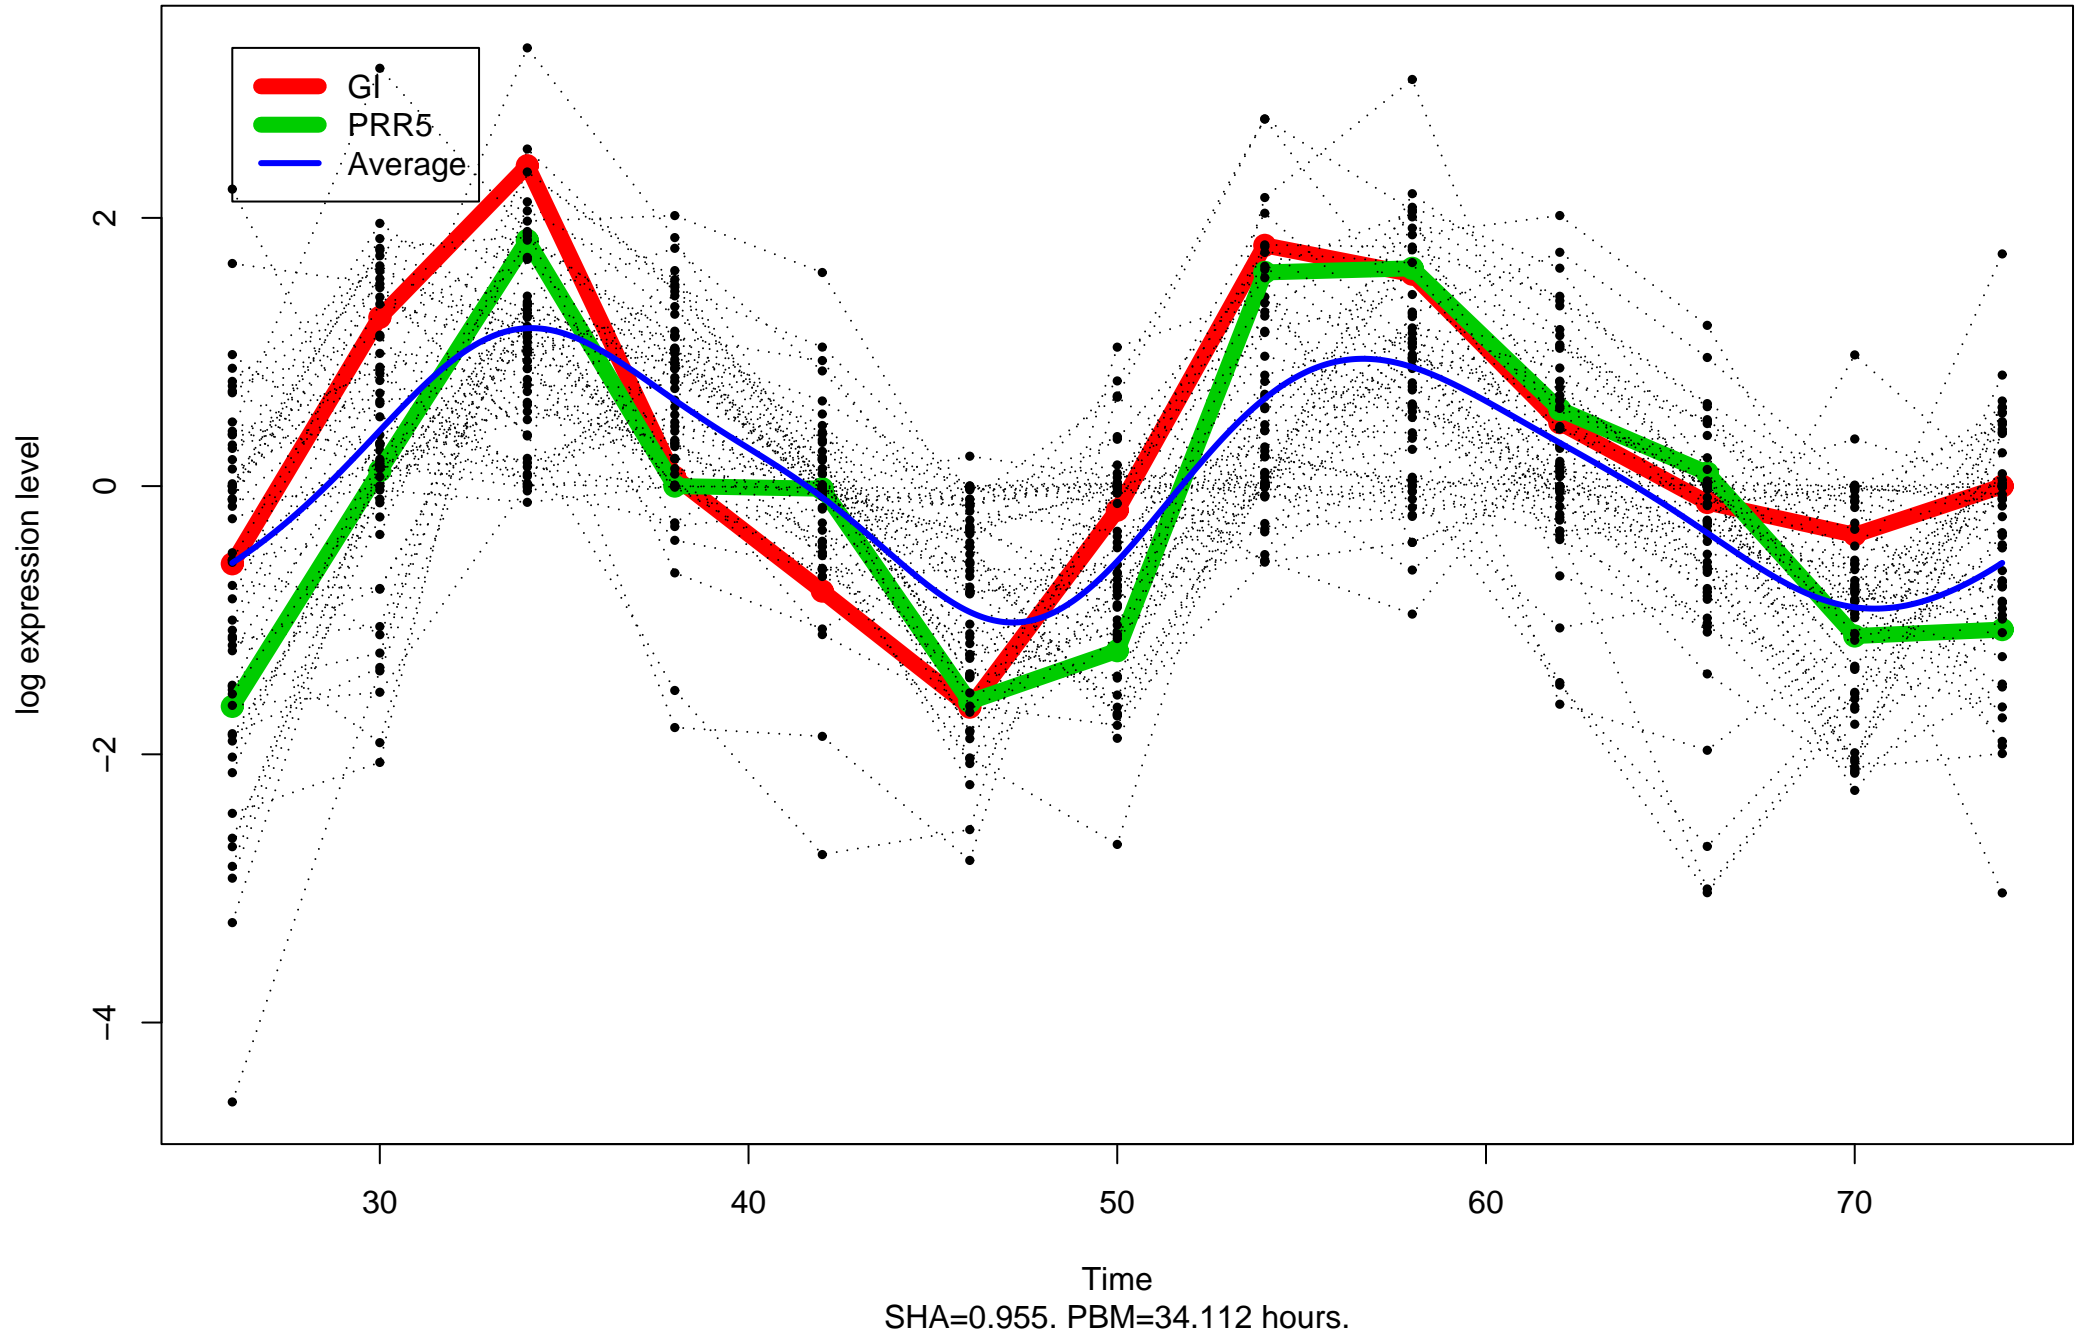

Cluster 23 (30 genes). SHR=0.783.

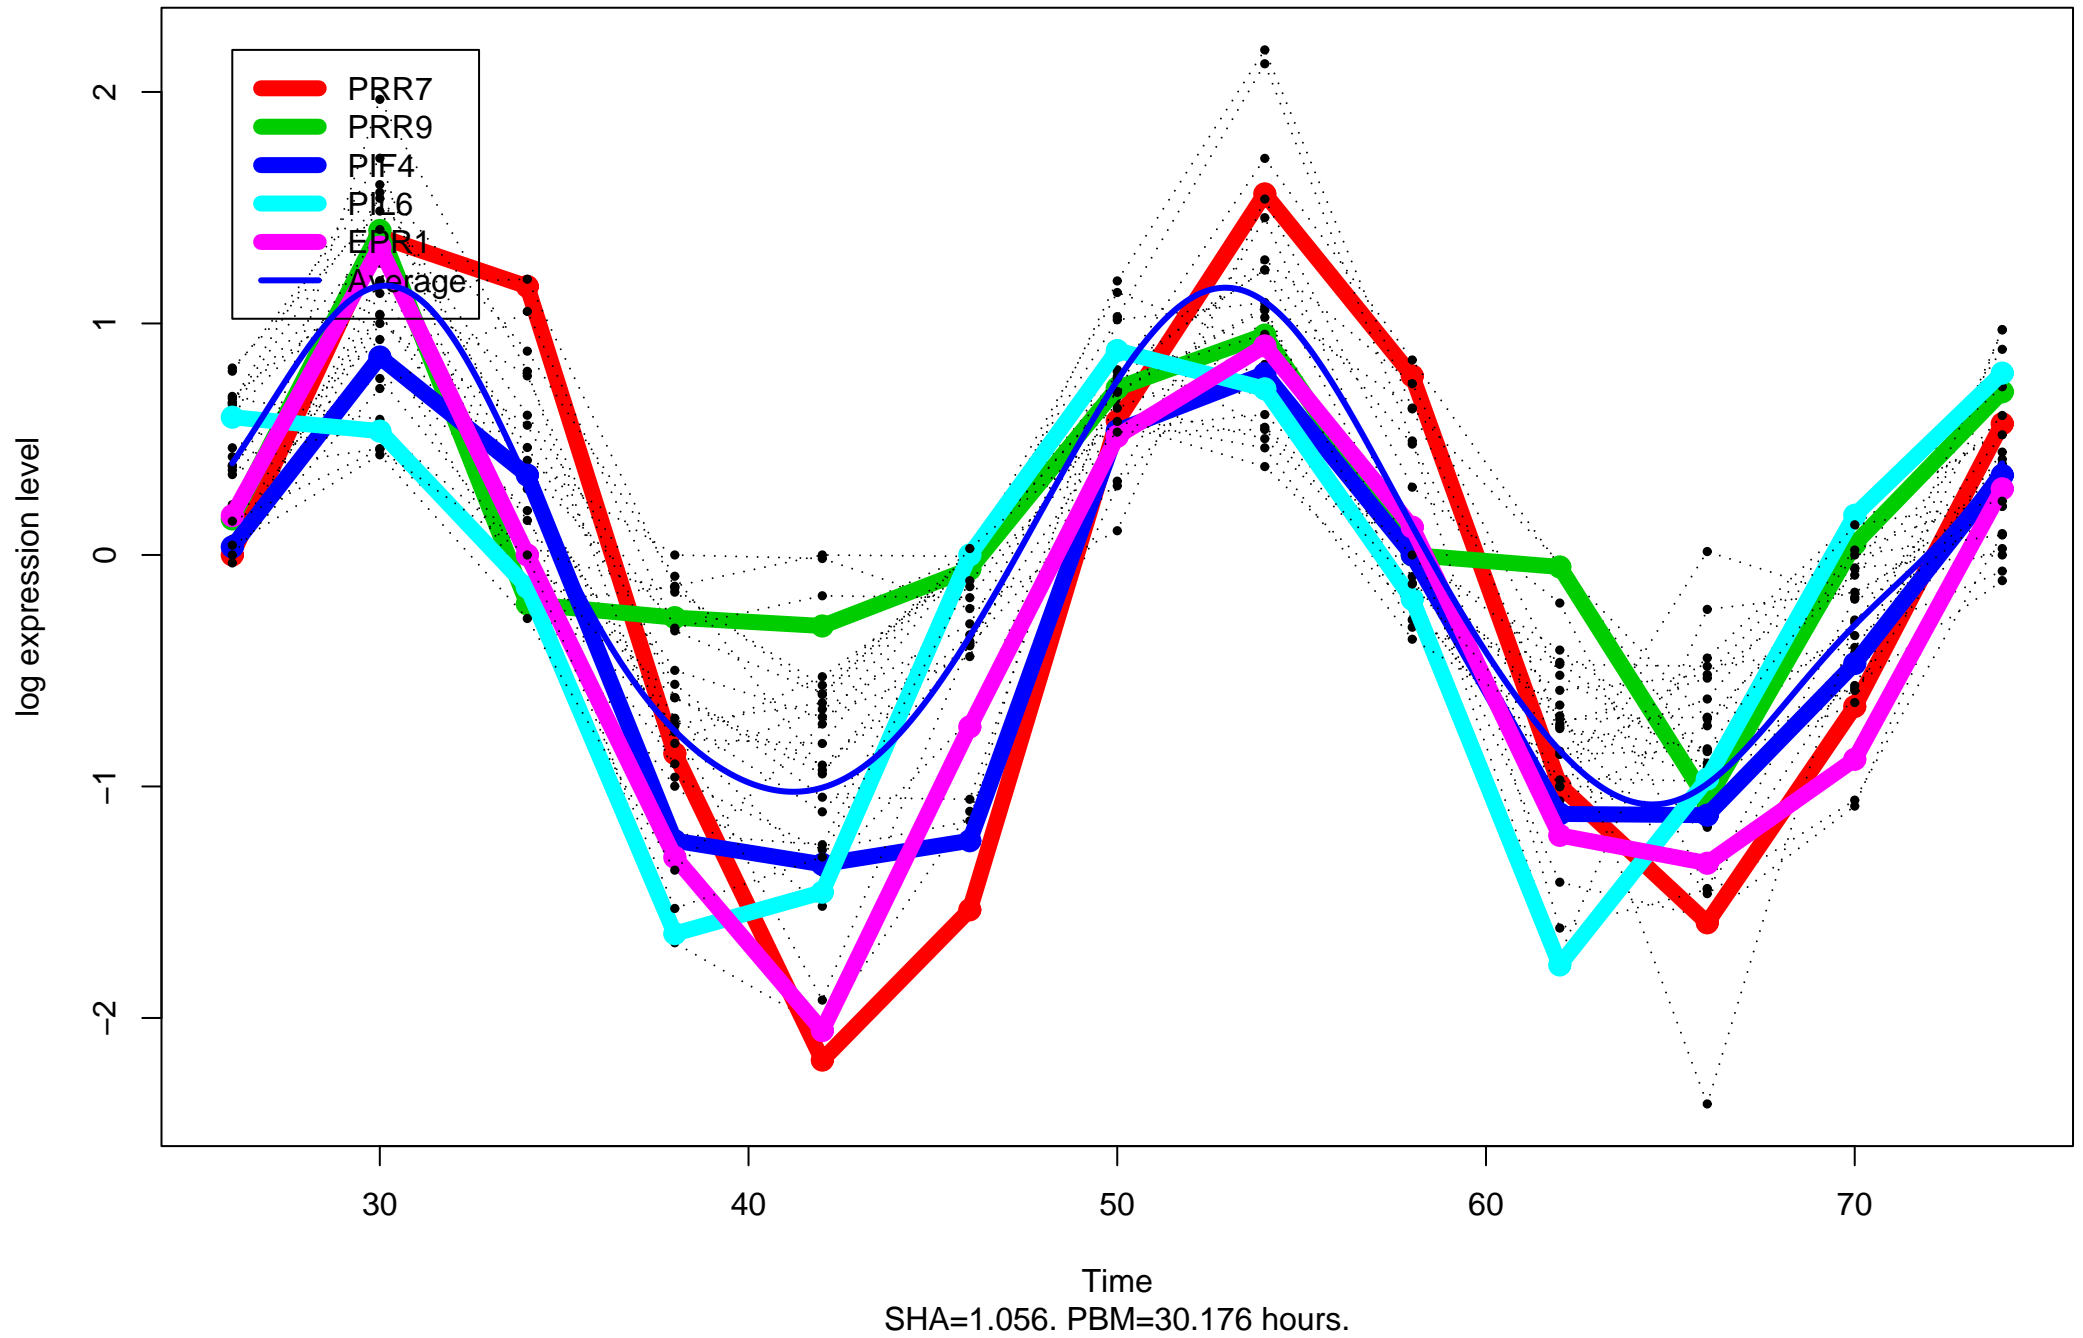

Cluster 24 (21 genes). SHR=0.387.

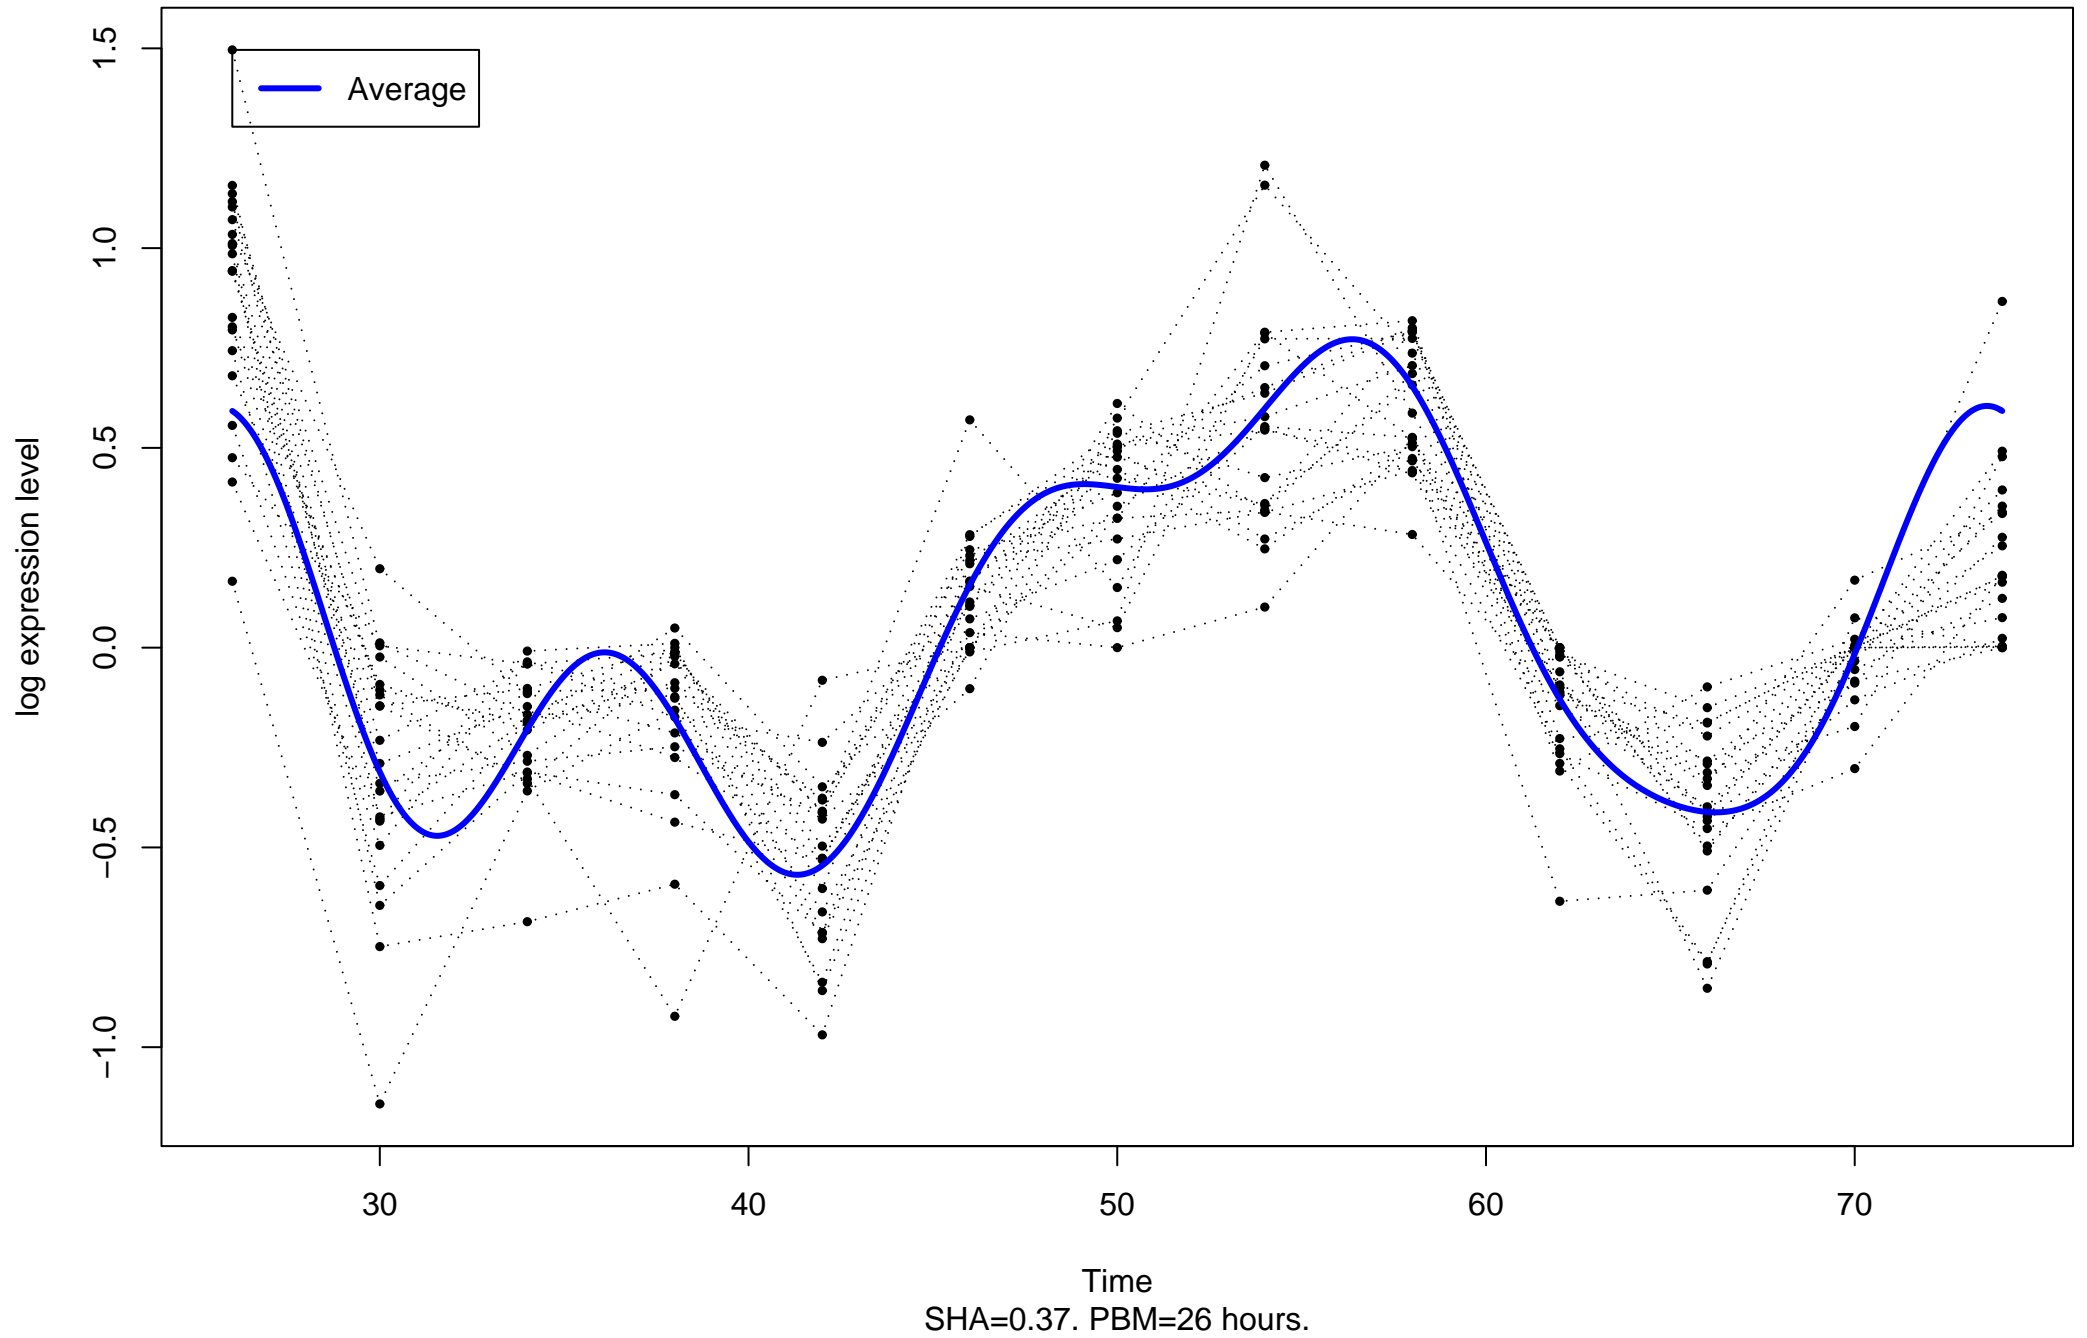



Cluster 25 (38 genes). SHR=0.645.

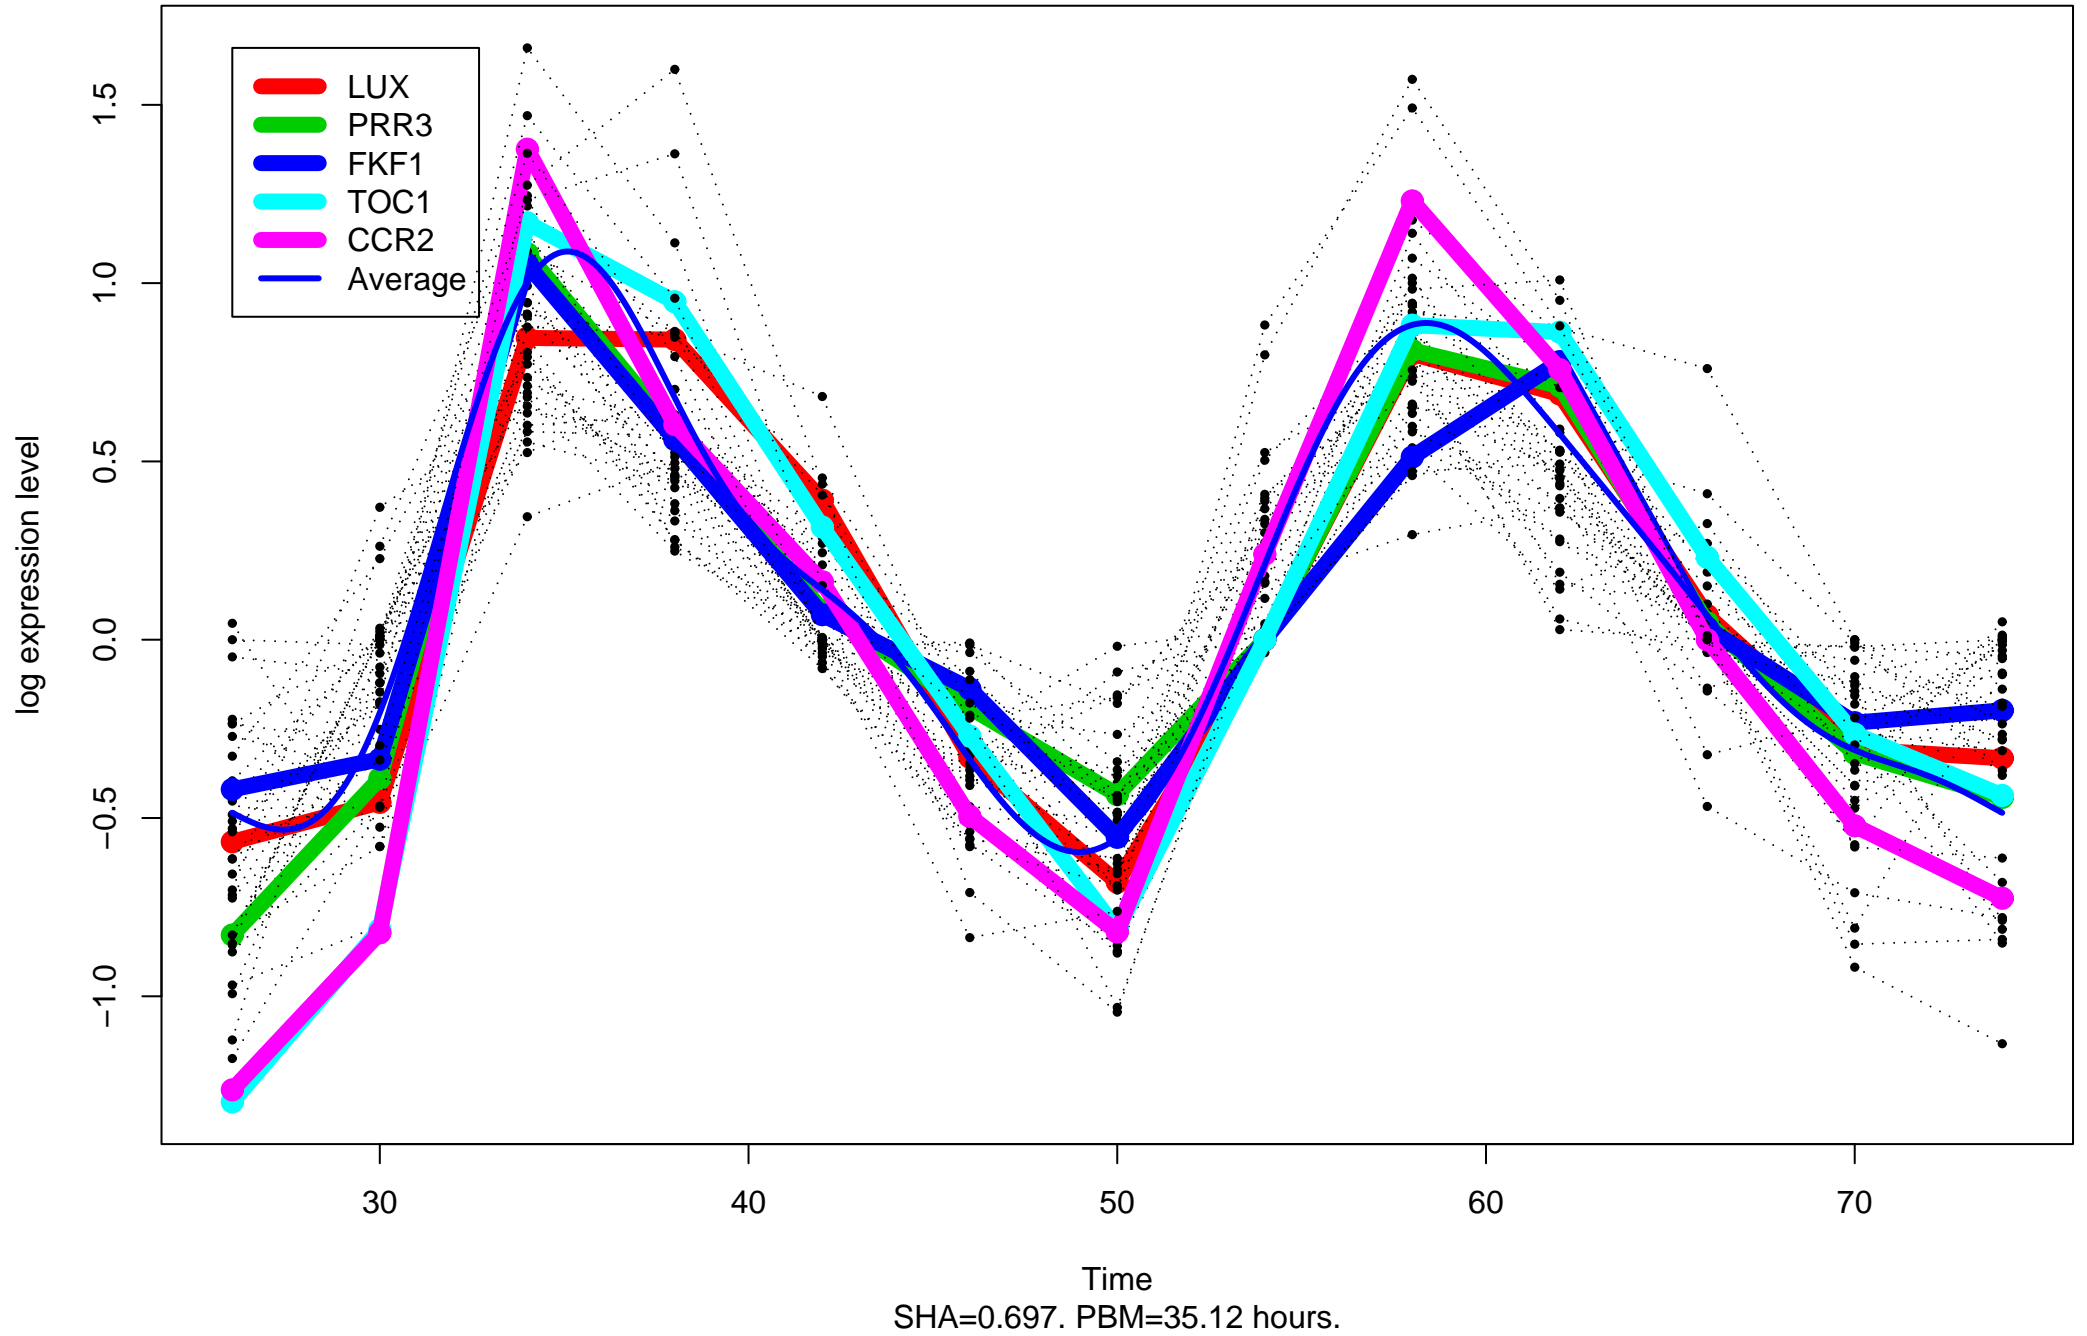

Cluster 26 (131 genes). SHR=0.716.

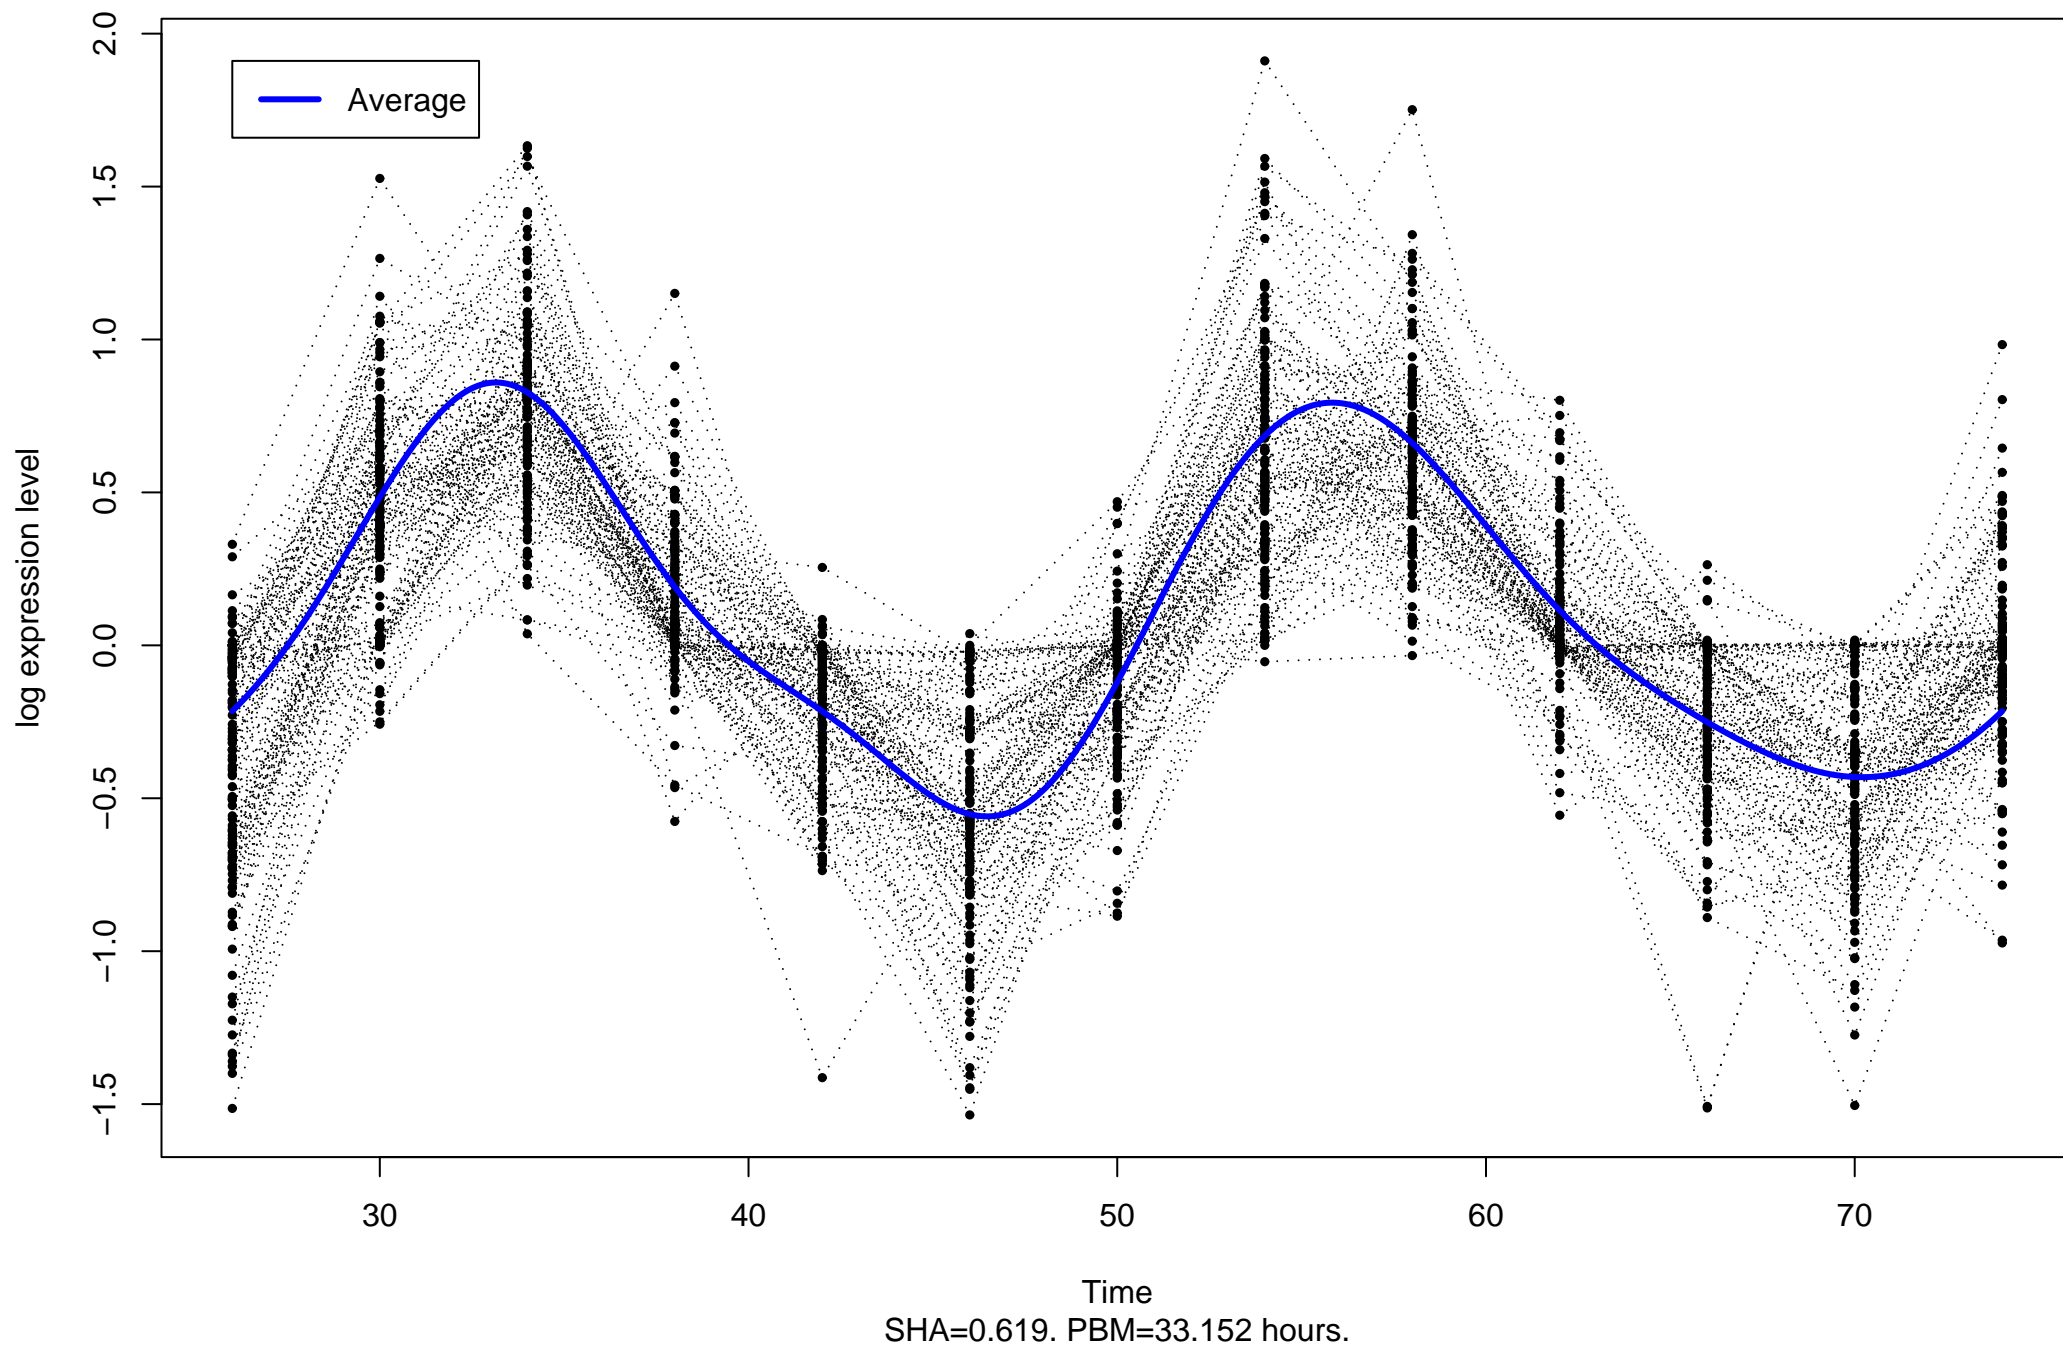

Cluster 27 (100 genes). SHR=0.703.

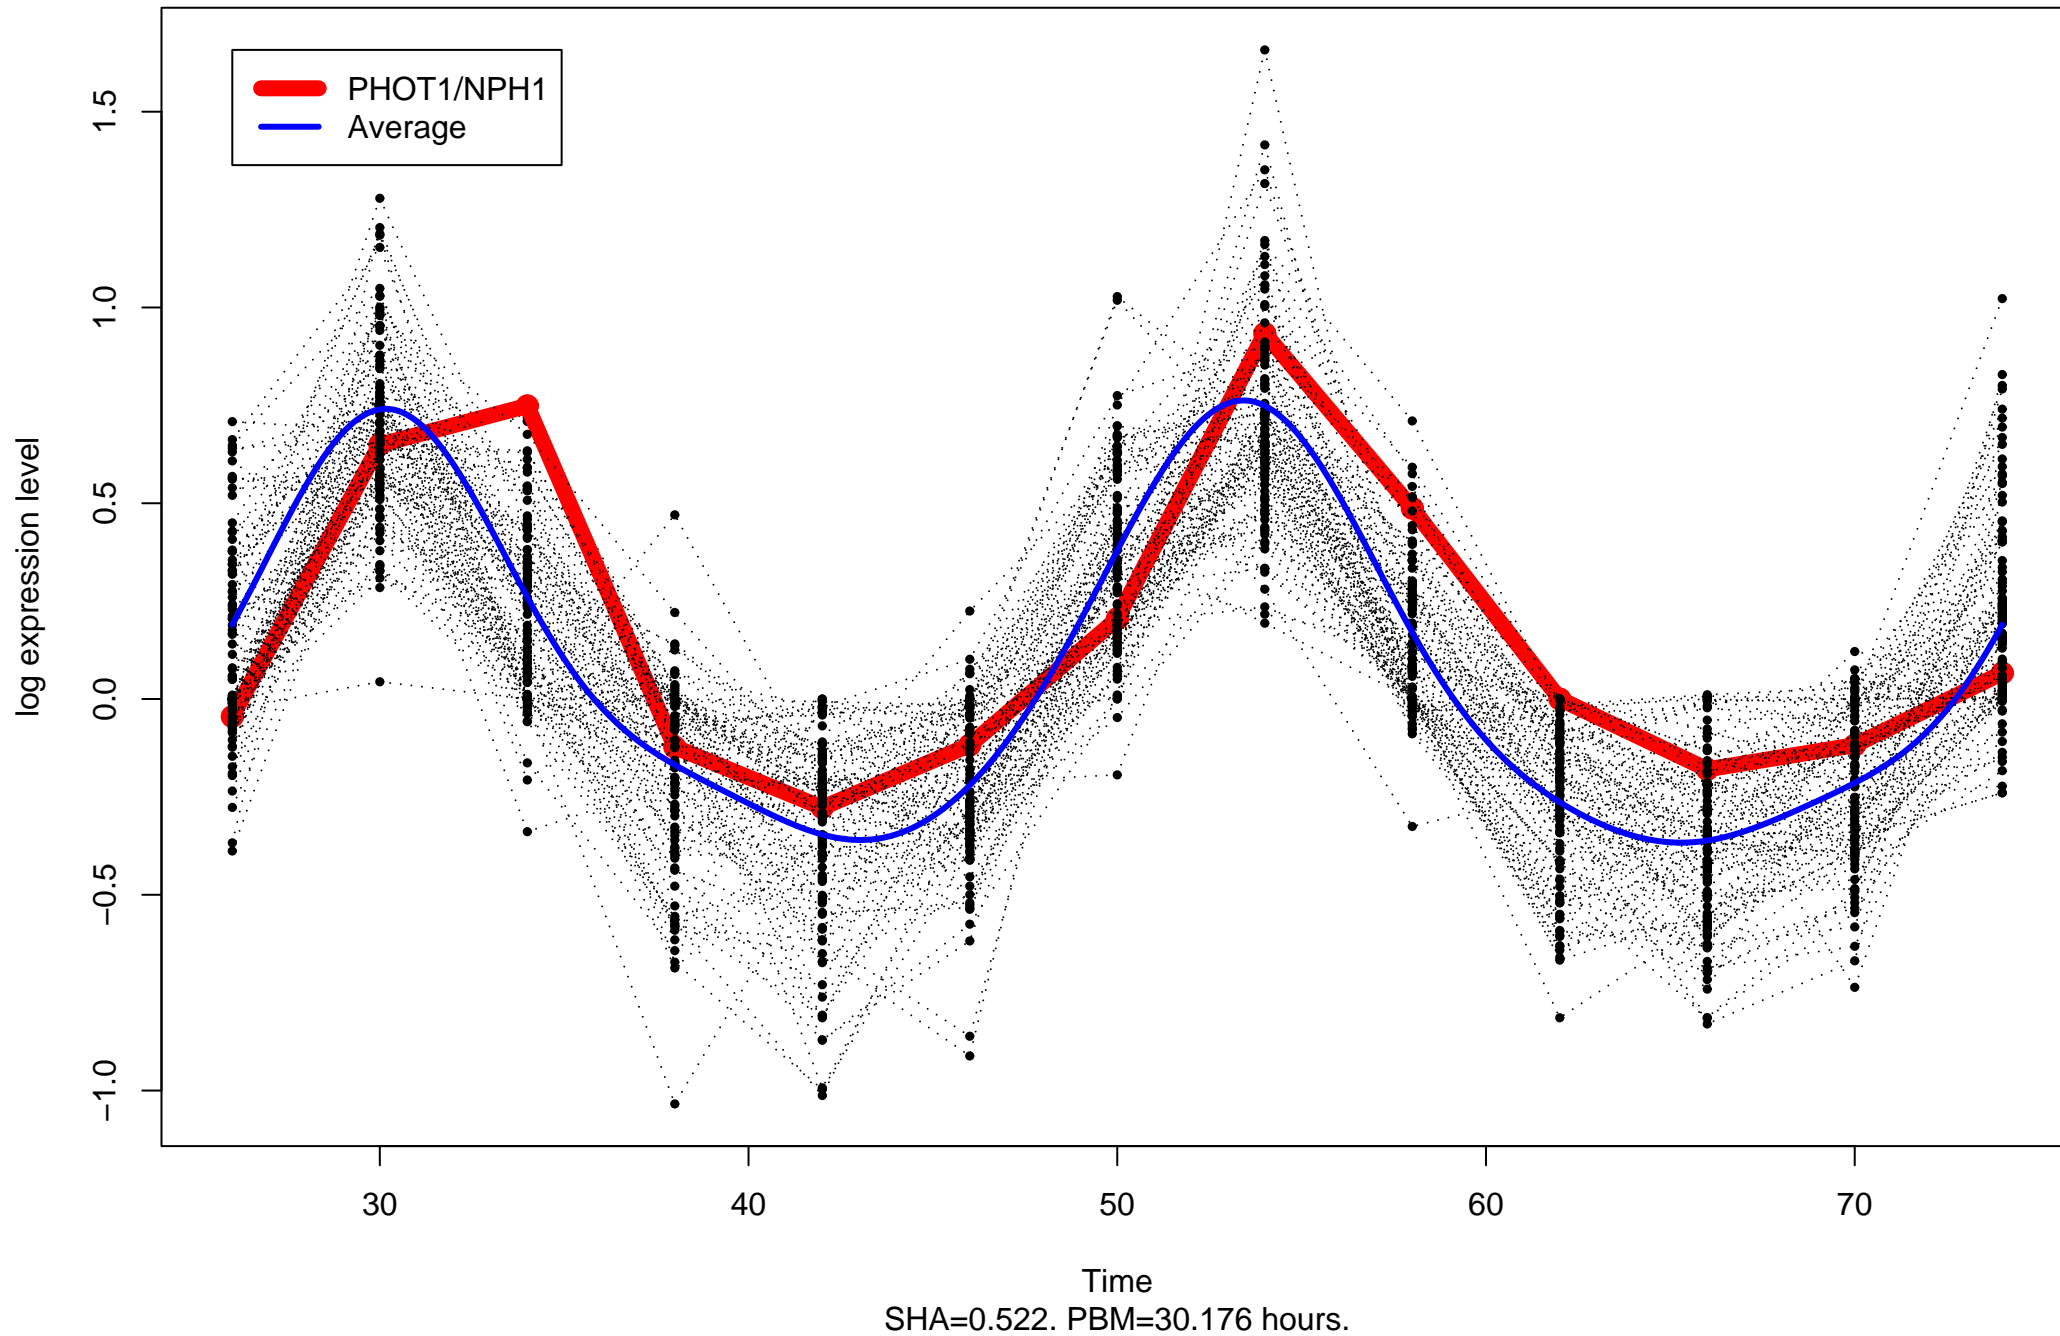

Supplement: plntcell_tpc.105.038315_1.pdf [file plntcell_tpc.105.038315_1.pdf]
