# Supplementary material
Source: PubMed Central journal article supplement (PMC1383639)
Supplement: plntcell_tpc.105.038315_2.pdf [file plntcell_tpc.105.038315_2.pdf]

| Rank | Affy ID     | AGI/Identifier | Fold Change |            |
|------|-------------|----------------|-------------|------------|
| 1    | 250476_at   | At5g10140      | 113.3       | <i>FLC</i> |
| 2    | 258327_at   | At3g22640      | 0.0361      |            |
| 3    | 249053_at   | At5g44440      | 0.0495      |            |
| 4    | 255546_at   | At4g01910      | 0.0691      |            |
| 5    | 246432_at   | At5g17490      | 0.0698      |            |
| 6    | 246299_at   | At3g51810      | 0.071       |            |
| 7    | 266503_at   | At2g47780      | 0.0746      |            |
| 8    | 248520_at   | At5g50600      | 0.0746      |            |
| 9    | 259314_at   | At3g05260      | 0.075       |            |
| 10   | 256931_at   | At3g22490      | 0.08        |            |
| 11   | 258224_at   | At3g15670      | 0.0803      |            |
| 12   | 267579_at   | At2g42000      | 0.0805      |            |
| 13   | 263753_at   | At2g21490      | 0.0814      |            |
| 14   | 247061_at   | At5g66780      | 0.094       |            |
| 15   | 253707_at   | At4g29200      | 0.099       |            |
| 16   | 257234_at   | At3g14880      | 0.0996      |            |
| 17   | 267075_at   | At2g41070      | 0.107       |            |
| 18   | 257947_at   | At3g21720      | 0.107       |            |
| 19   | 250868_at   | At5g03860      | 0.112       |            |
| 20   | 250882_at   | At5g04000      | 0.112       |            |
| 21   | 256139_at   | At1g48660      | 0.119       |            |
| 22   | 246273_at   | At4g36700      | 0.124       |            |
| 23   | 255471_at   | At4g03050      | 0.129       |            |
| 24   | 250648_at   | At5g06760      | 0.133       |            |
| 25   | 264494_at   | At1g27470      | 0.134       |            |
| 26   | 265091_s_at | At1g03495      | 7.361       |            |
| 27   | 267431_at   | At2g34870      | 0.14        |            |
| 28   | 262001_at   | At1g33790      | 0.142       |            |
| 29   | 253152_at   | At4g35690      | 0.143       |            |
| 30   | 255007_at   | At4g10020      | 0.144       |            |
| 31   | 263138_at   | At1g65090      | 0.147       |            |
| 32   | 260556_at   | At2g43620      | 0.148       |            |
| 33   | 252137_at   | At3g50980      | 0.148       |            |
| 34   | 256464_at   | At1g32560      | 0.152       |            |
| 35   | 259167_at   | At3g01570      | 0.154       |            |
| 36   | 263492_at   | At2g42560      | 0.155       |            |
| 37   | 249039_at   | At5g44310      | 0.159       |            |
| 38   | 245070_at   | At2g23240      | 0.161       |            |
| 39   | 260668_at   | At1g19530      | 0.166       |            |
| 40   | 246242_at   | At4g36600      | 0.171       |            |
| 41   | 249937_at   | At5g22470      | 0.171       |            |
| 42   | 258339_at   | At3g16120      | 0.171       |            |
| 43   | 257853_at   | At3g12960      | 0.176       |            |
| 44   | 256898_at   | At3g24650      | 0.178       |            |
| 45   | 247095_at   | At5g66400      | 0.181       |            |
| 46   | 255550_at   | At4g01970      | 0.182       |            |
| 47   | 248125_at   | At5g54740      | 0.184       |            |
| 48   | 250083_at   | At5g17220      | 5.327       |            |
| 49   | 251838_at   | At3g54940      | 0.188       |            |
| 50   | 254283_s_at | At4g22870      | 5.304       |            |
| 51   | 264888_at   | At1g23070      | 0.19        |            |

|     |           |           |       |
|-----|-----------|-----------|-------|
| 52  | 263377_at | At2g40220 | 0.19  |
| 53  | 256924_at | At3g29590 | 5.231 |
| 54  | 264612_at | At1g04560 | 0.193 |
| 55  | 249246_at | At5g42290 | 0.2   |
| 56  | 265379_at | At2g18340 | 0.205 |
| 57  | 260994_at | At1g12130 | 0.208 |
| 58  | 262580_at | At1g15330 | 0.209 |
| 59  | 258932_at | At3g10150 | 0.211 |
| 60  | 245335_at | At4g16160 | 0.212 |
| 61  | 259076_at | At3g02140 | 0.213 |
| 62  | 245465_at | At4g16590 | 0.213 |
| 63  | 261936_at | At1g22600 | 0.217 |
| 64  | 263161_at | At1g54020 | 0.22  |
| 65  | 266670_at | At2g29740 | 0.222 |
| 66  | 265211_at | At2g36640 | 0.223 |
| 67  | 265891_at | At2g15010 | 0.227 |
| 68  | 262069_at | At1g80090 | 0.236 |
| 69  | 264215_at | At1g65340 | 0.239 |
| 70  | 248915_at | At5g45690 | 0.24  |
| 71  | 266544_at | At2g35300 | 0.241 |
| 72  | 258347_at | At3g17520 | 0.242 |
| 73  | 255905_at | At1g17810 | 0.243 |
| 74  | 266274_at | At2g29380 | 0.244 |
| 75  | 262128_at | At1g52690 | 0.245 |
| 76  | 256416_at | At3g11050 | 0.245 |
| 77  | 267321_at | At2g19320 | 0.245 |
| 78  | 259217_at | At3g03620 | 0.249 |
| 79  | 250624_at | At5g07330 | 0.249 |
| 80  | 248096_at | At5g55240 | 0.25  |
| 81  | 262734_at | At1g28640 | 0.252 |
| 82  | 245624_at | At4g14090 | 3.96  |
| 83  | 258498_at | At3g02480 | 0.253 |
| 84  | 265672_at | At2g31980 | 0.254 |
| 85  | 249215_at | At5g42800 | 3.932 |
| 86  | 254634_at | At4g18650 | 0.259 |
| 87  | 251620_at | At3g58060 | 0.262 |
| 88  | 256354_at | At1g54870 | 0.265 |
| 89  | 247582_at | At5g60760 | 0.267 |
| 90  | 267263_at | At2g23110 | 0.267 |
| 91  | 265255_at | At2g28420 | 0.269 |
| 92  | 261305_at | At1g48470 | 0.27  |
| 93  | 263907_at | At2g36270 | 0.271 |
| 94  | 258240_at | At3g27660 | 0.271 |
| 95  | 249780_at | At5g24240 | 0.273 |
| 96  | 255547_at | At4g01920 | 0.273 |
| 97  | 254440_at | At4g21020 | 0.274 |
| 98  | 257059_at | At3g15280 | 0.275 |
| 99  | 253870_at | At4g27530 | 0.276 |
| 100 | 257994_at | At3g19920 | 0.281 |
| 101 | 260458_at | At1g68250 | 0.282 |
| 102 | 248736_at | At5g48110 | 0.283 |
| 103 | 263174_at | At1g54040 | 0.284 |
| 104 | 256338_at | At1g72100 | 0.292 |
| 105 | 267509_at | At2g45660 | 0.294 |

|     |             |           |       |
|-----|-------------|-----------|-------|
| 106 | 249983_at   | At5g18470 | 0.296 |
| 107 | 256340_at   | At1g72070 | 0.297 |
| 108 | 265084_at   | At1g03790 | 0.299 |
| 109 | 245233_at   | At4g25580 | 0.299 |
| 110 | 248869_at   | At5g46840 | 0.303 |
| 111 | 252019_at   | At3g53040 | 0.304 |
| 112 | 246582_at   | At1g31750 | 0.306 |
| 113 | 256827_at   | At3g18570 | 0.307 |
| 114 | 245024_at   | atpA      | 0.309 |
| 115 | 262347_at   | At1g64110 | 0.311 |
| 116 | 253874_at   | At4g27450 | 0.312 |
| 117 | 250118_at   | At5g16460 | 0.313 |
| 118 | 255521_at   | At4g02280 | 0.315 |
| 119 | 248969_at   | At5g45310 | 0.315 |
| 120 | 253895_at   | At4g27160 | 3.16  |
| 121 | 245381_at   | At4g17785 | 3.155 |
| 122 | 248050_at   | At5g56100 | 0.32  |
| 123 | 253494_at   | At4g31830 | 0.322 |
| 124 | 248435_at   | At5g51210 | 0.322 |
| 125 | 247904_at   | At5g57390 | 0.322 |
| 126 | 251100_at   | At5g01670 | 0.323 |
| 127 | 253008_at   | At4g38210 | 0.324 |
| 128 | 248352_at   | At5g52300 | 0.327 |
| 129 | 259042_at   | At3g03450 | 0.328 |
| 130 | 247023_at   | At5g67060 | 0.329 |
| 131 | 248722_at   | At5g47810 | 0.331 |
| 132 | 256938_at   | At3g22500 | 0.332 |
| 133 | 266357_at   | At2g32290 | 0.332 |
| 134 | 254635_at   | At4g18670 | 2.992 |
| 135 | 251137_at   | At5g01300 | 0.339 |
| 136 | 256766_at   | At3g22231 | 2.924 |
| 137 | 248622_at   | At5g49360 | 0.342 |
| 138 | 245052_at   | At2g26440 | 0.343 |
| 139 | 250781_at   | At5g05410 | 0.345 |
| 140 | 252914_at   | At4g39130 | 0.347 |
| 141 | 255056_at   | At4g09820 | 2.875 |
| 142 | 253930_at   | At4g26740 | 0.349 |
| 143 | 259573_at   | At1g20390 | 0.35  |
| 144 | 245970_at   | At5g20710 | 0.351 |
| 145 | 255676_at   | At4g00490 | 0.352 |
| 146 | 259526_at   | At1g12570 | 2.844 |
| 147 | 250199_at   | At5g14180 | 0.352 |
| 148 | 254203_at   | At4g24150 | 0.352 |
| 149 | 255048_at   | At4g09600 | 0.355 |
| 150 | 258586_s_at | At3g04320 | 0.359 |
| 151 | 263158_at   | At1g54160 | 2.781 |
| 152 | 264782_at   | At1g08810 | 2.78  |
| 153 | 259432_at   | At1g01520 | 0.36  |
| 154 | 253154_at   | At4g35710 | 0.363 |
| 155 | 247421_at   | At5g62800 | 0.364 |
| 156 | 259813_at   | At1g49860 | 2.747 |
| 157 | 246872_at   | At5g26080 | 2.745 |
| 158 | 251238_at   | At3g62430 | 2.743 |
| 159 | 247269_at   | At5g64210 | 0.365 |

|     |             |           |       |
|-----|-------------|-----------|-------|
| 160 | 263881_at   | At2g21820 | 0.365 |
| 161 | 264079_at   | At2g28490 | 0.37  |
| 162 | 248185_at   | At5g54060 | 2.695 |
| 163 | 253847_at   | At4g28010 | 0.371 |
| 164 | 260037_at   | At1g68840 | 2.69  |
| 165 | 256114_at   | At1g16850 | 0.373 |
| 166 | 254806_at   | At4g12430 | 0.377 |
| 167 | 247437_at   | At5g62490 | 0.377 |
| 168 | 250746_at   | At5g05880 | 0.377 |
| 169 | 264400_at   | At1g61800 | 0.377 |
| 170 | 249111_at   | At5g43770 | 0.382 |
| 171 | 266778_at   | At2g29090 | 0.383 |
| 172 | 248084_at   | At5g55470 | 0.383 |
| 173 | 245628_at   | At1g56650 | 2.607 |
| 174 | 245523_at   | At4g15910 | 0.384 |
| 175 | 255479_at   | At4g02380 | 0.384 |
| 176 | 265236_s_at | At2g07714 | 2.574 |
| 177 | 256071_at   | At1g13640 | 0.389 |
| 178 | 265611_at   | At2g25510 | 2.566 |
| 179 | 263103_at   | At2g05290 | 2.542 |
| 180 | 265179_at   | At1g23650 | 2.53  |
| 181 | 250180_at   | At5g14450 | 0.396 |
| 182 | 259935_at   | At1g71250 | 0.399 |
| 183 | 249772_at   | At5g24130 | 0.4   |
| 184 | 257243_at   | At3g24230 | 2.499 |
| 185 | 259578_at   | At1g27990 | 0.402 |
| 186 | 245119_at   | At2g41640 | 0.407 |
| 187 | 267036_at   | At2g38465 | 0.409 |
| 188 | 247128_at   | At5g66110 | 0.41  |
| 189 | 266143_at   | At2g38905 | 0.41  |
| 190 | 263385_at   | At2g40170 | 0.411 |
| 191 | 259802_at   | At1g72260 | 0.413 |
| 192 | 245161_at   | At2g33070 | 0.414 |
| 193 | 247718_at   | At5g59310 | 0.417 |
| 194 | 261169_at   | At1g04920 | 0.419 |
| 195 | 259561_at   | At1g21250 | 2.375 |
| 196 | 249013_at   | At5g44700 | 0.421 |
| 197 | 267286_at   | At2g23640 | 0.424 |
| 198 | 250155_at   | At5g15160 | 2.359 |
| 199 | 266654_at   | At2g25890 | 0.424 |
| 200 | 248231_at   | At5g53770 | 0.425 |
| 201 | 265447_at   | At2g46570 | 2.354 |
| 202 | 267089_at   | At2g38300 | 2.354 |
| 203 | 250561_at   | At5g08030 | 2.352 |
| 204 | 266154_at   | At2g12190 | 2.339 |
| 205 | 251509_at   | At3g59010 | 2.337 |
| 206 | 260917_at   | At1g02700 | 0.429 |
| 207 | 248505_at   | At5g50360 | 0.43  |
| 208 | 251580_at   | At3g58450 | 0.431 |
| 209 | 262373_at   | At1g73120 | 0.431 |
| 210 | 266292_at   | At2g29350 | 2.315 |
| 211 | 267076_at   | At2g41090 | 2.305 |
| 212 | 247326_at   | At5g64110 | 2.304 |
| 213 | 256472_at   | At1g42610 | 2.299 |

|     |             |           |       |
|-----|-------------|-----------|-------|
| 214 | 263947_at   | At2g35820 | 0.436 |
| 215 | 263730_at   | At1g60090 | 0.436 |
| 216 | 247913_at   | At5g57510 | 2.285 |
| 217 | 255579_at   | At4g01460 | 0.438 |
| 218 | 244914_at   | orf107e   | 2.275 |
| 219 | 264007_at   | At2g21140 | 2.272 |
| 220 | 251012_at   | At5g02580 | 0.44  |
| 221 | 262675_at   | At1g75930 | 2.27  |
| 222 | 261135_at   | At1g19610 | 0.443 |
| 223 | 265572_at   | At2g28210 | 2.256 |
| 224 | 267361_at   | At2g39920 | 0.444 |
| 225 | 263191_at   | At1g36120 | 2.245 |
| 226 | 260241_at   | At1g63710 | 2.244 |
| 227 | 251235_at   | At3g62860 | 0.447 |
| 228 | 255294_at   | At4g04750 | 2.226 |
| 229 | 267337_at   | At2g39980 | 0.45  |
| 230 | 263401_at   | At2g04070 | 2.222 |
| 231 | 266690_at   | At2g19900 | 0.451 |
| 232 | 257885_at   | At3g16970 | 2.211 |
| 233 | 264606_at   | At1g04660 | 0.454 |
| 234 | 248372_at   | At5g51850 | 0.454 |
| 235 | 266415_at   | At2g38530 | 0.454 |
| 236 | 257488_s_at | At4g00070 | 2.202 |
| 237 | 265885_at   | At2g42330 | 0.455 |
| 238 | 255763_at   | At1g16730 | 0.458 |
| 239 | 260915_at   | At1g02660 | 0.459 |
| 240 | 246813_at   | At5g27190 | 2.179 |
| 241 | 260220_at   | At1g74650 | 2.175 |
| 242 | 254384_at   | At4g21870 | 0.46  |
| 243 | 266462_at   | At2g47770 | 0.461 |
| 244 | 250165_at   | At5g15290 | 0.461 |
| 245 | 256571_at   | At3g30730 | 2.162 |
| 246 | 256290_at   | At3g12203 | 0.463 |
| 247 | 256554_at   | At3g31380 | 2.159 |
| 248 | 258603_at   | At3g02990 | 0.464 |
| 249 | 245944_at   | At5g19520 | 0.464 |
| 250 | 262124_at   | At1g59660 | 2.148 |
| 251 | 254805_at   | At4g12480 | 2.148 |
| 252 | 263625_at   | At2g04920 | 2.145 |
| 253 | 265301_s_at | At2g13960 | 0.466 |
| 254 | 250646_at   | At5g06720 | 0.466 |
| 255 | 257670_at   | At3g20340 | 0.467 |
| 256 | 257859_at   | At3g12955 | 0.468 |
| 257 | 259782_at   | At1g29680 | 0.469 |
| 258 | 249364_at   | At5g40590 | 2.128 |
| 259 | 244953_s_at | nad6      | 2.124 |
| 260 | 250780_at   | At5g05290 | 0.471 |
| 261 | 244977_at   | petD      | 2.123 |
| 262 | 257244_at   | At3g24240 | 0.471 |
| 263 | 252073_at   | At3g51750 | 0.471 |
| 264 | 264943_at   | At1g76910 | 2.114 |
| 265 | 253767_at   | At4g28520 | 0.473 |
| 266 | 267409_at   | At2g34910 | 0.474 |
| 267 | 251466_at   | At3g59340 | 0.475 |

|     |             |           |       |
|-----|-------------|-----------|-------|
| 268 | 252417_at   | At3g47480 | 2.098 |
| 269 | 258168_at   | At3g21570 | 2.095 |
| 270 | 251438_s_at | At3g59930 | 0.478 |
| 271 | 265693_at   | At2g24350 | 2.094 |
| 272 | 255581_at   | At4g01490 | 2.078 |
| 273 | 255189_at   | At4g07350 | 2.078 |
| 274 | 259364_at   | At1g13260 | 0.482 |
| 275 | 264187_at   | At1g54860 | 0.482 |
| 276 | 251511_at   | At3g59180 | 2.073 |
| 277 | 254155_at   | At4g24480 | 0.483 |
| 278 | 251731_at   | At3g56350 | 0.484 |
| 279 | 250769_at   | At5g05680 | 0.485 |
| 280 | 266688_at   | At2g19660 | 0.485 |
| 281 | 263501_s_at | At2g07673 | 2.058 |
| 282 | 266637_at   | At2g35600 | 2.053 |
| 283 | 255086_at   | At4g09300 | 2.049 |
| 284 | 255527_at   | At4g02360 | 0.488 |
| 285 | 256913_at   | At3g23870 | 0.489 |
| 286 | 256296_at   | At1g69480 | 0.489 |
| 287 | 245875_at   | At1g26240 | 2.041 |
| 288 | 252706_at   | At3g43770 | 2.041 |
| 289 | 252487_at   | At3g46660 | 0.49  |
| 290 | 248494_at   | At5g50770 | 0.491 |
| 291 | 245453_at   | At4g16900 | 2.032 |
| 292 | 262977_at   | At1g75490 | 0.492 |
| 293 | 265621_at   | At2g27300 | 0.494 |
| 294 | 257358_at   | At2g40990 | 2.026 |
| 295 | 264433_at   | At1g61810 | 0.494 |
| 296 | 245982_at   | At5g13170 | 0.495 |
| 297 | 251983_at   | At3g53210 | 0.495 |
| 298 | 244957_at   | orf157    | 2.019 |
| 299 | 249082_at   | At5g44120 | 0.496 |
| 300 | 254213_at   | At4g23590 | 0.496 |
| 301 | 259509_at   | At1g43930 | 2.01  |
| 302 | 264958_at   | At1g76960 | 2.009 |
| 303 | 250345_at   | At5g11940 | 2.008 |
| 304 | 255512_at   | At4g02195 | 0.498 |
| 305 | 255577_at   | At4g01410 | 0.499 |
| 306 | 264623_at   | At1g09000 | 0.499 |
| 307 | 263175_at   | At1g05510 | 0.499 |
| 308 | 249619_at   | At5g37500 | 0.499 |
| 309 | 247136_at   | At5g66170 | 0.499 |
| 310 | 255045_at   | At4g09690 | 2.002 |
| 311 | 249353_at   | At5g40420 | 0.501 |
| 312 | 249390_at   | At5g40130 | 1.995 |
| 313 | 253293_at   | At4g33905 | 1.994 |
| 314 | 246786_at   | At5g27410 | 0.502 |
| 315 | 257008_at   | At3g14210 | 1.99  |
| 316 | 263276_at   | At2g14100 | 0.504 |
| 317 | 255840_at   | At2g33520 | 0.504 |
| 318 | 254095_at   | At4g25140 | 0.504 |
| 319 | 253161_at   | At4g35770 | 0.506 |
| 320 | 260012_at   | At1g67865 | 0.507 |
| 321 | 246888_at   | At5g26270 | 1.97  |

|     |             |           |       |
|-----|-------------|-----------|-------|
| 322 | 264166_at   | At1g65370 | 0.508 |
| 323 | 253433_s_at | At4g32490 | 1.96  |
| 324 | 256477_at   | At1g42690 | 1.96  |
| 325 | 249947_at   | At5g19200 | 0.511 |
| 326 | 255589_s_at | At4g01590 | 0.511 |
| 327 | 258765_at   | At3g10710 | 0.512 |
| 328 | 248916_at   | At5g45840 | 0.512 |
| 329 | 250152_at   | At5g15120 | 0.512 |
| 330 | 263789_at   | At2g24560 | 0.513 |
| 331 | 249532_at   | At5g38780 | 0.514 |
| 332 | 266787_at   | At2g28990 | 1.946 |
| 333 | 250908_at   | At5g03680 | 1.945 |
| 334 | 262185_at   | At1g77950 | 0.514 |
| 335 | 248337_at   | At5g52310 | 0.515 |
| 336 | 245655_at   | At1g56530 | 1.943 |
| 337 | 255703_at   | At4g00040 | 0.515 |
| 338 | 266585_at   | At2g14930 | 1.936 |
| 339 | 257057_at   | At3g15310 | 1.935 |
| 340 | 254245_at   | At4g23240 | 1.935 |
| 341 | 248830_at   | At5g47150 | 1.935 |
| 342 | 245034_at   | At2g26390 | 1.934 |
| 343 | 256561_s_at | At3g31330 | 1.934 |
| 344 | 255300_at   | At4g04870 | 0.518 |
| 345 | 258914_at   | At3g06360 | 1.93  |
| 346 | 255632_at   | At4g00680 | 0.519 |
| 347 | 253529_at   | At4g31520 | 1.925 |
| 348 | 253556_at   | At4g31100 | 0.52  |
| 349 | 256069_at   | At1g13740 | 0.521 |
| 350 | 245265_at   | At4g14400 | 1.918 |
| 351 | 257368_at   | At2g29860 | 1.917 |
| 352 | 252501_at   | At3g46880 | 1.916 |
| 353 | 245053_at   | At2g26450 | 1.915 |
| 354 | 264144_at   | At1g79320 | 0.523 |
| 355 | 254870_at   | At4g11900 | 1.911 |
| 356 | 263966_s_at | At2g13000 | 1.911 |
| 357 | 259126_at   | At3g02280 | 0.524 |
| 358 | 265747_s_at | At2g06645 | 1.906 |
| 359 | 262765_at   | At1g13150 | 1.904 |
| 360 | 251654_at   | At3g57140 | 0.525 |
| 361 | 266499_at   | At2g06970 | 1.901 |
| 362 | 260662_at   | At1g19540 | 0.526 |
| 363 | 244937_at   | ndhH      | 0.526 |
| 364 | 266838_at   | At2g25980 | 0.527 |
| 365 | 251668_at   | At3g57010 | 0.527 |
| 366 | 265603_at   | At2g14360 | 1.895 |
| 367 | 256521_at   | At1g66120 | 1.894 |
| 368 | 249444_at   | At5g39370 | 1.891 |
| 369 | 261221_at   | At1g19960 | 1.89  |
| 370 | 266952_at   | At2g34555 | 1.89  |
| 371 | 266072_at   | At2g18700 | 0.529 |
| 372 | 265397_at   | At2g11090 | 1.887 |
| 373 | 259766_at   | At1g64360 | 1.885 |
| 374 | 247536_at   | At5g61650 | 0.531 |
| 375 | 260470_at   | At1g11120 | 1.884 |

|     |           |           |       |
|-----|-----------|-----------|-------|
| 376 | 261058_at | At1g01370 | 1.884 |
| 377 | 266965_at | At2g39510 | 0.531 |
| 378 | 256499_at | At1g36640 | 1.881 |
| 379 | 259831_at | At1g69600 | 0.533 |
| 380 | 260907_at | At1g02570 | 1.876 |
| 381 | 247731_at | At5g59590 | 0.533 |
| 382 | 252840_at | At5g32630 | 1.874 |
| 383 | 251996_at | At3g52840 | 0.534 |
| 384 | 254710_at | At4g18050 | 0.534 |
| 385 | 267354_at | At2g39880 | 1.87  |
| 386 | 256692_at | At3g32050 | 1.868 |
| 387 | 261342_at | At1g52950 | 1.868 |
| 388 | 252321_at | At3g48510 | 0.536 |
| 389 | 251039_at | At5g02020 | 0.536 |
| 390 | 261907_at | At1g65060 | 1.865 |
| 391 | 250942_at | At5g03350 | 1.865 |
| 392 | 265954_at | At2g37260 | 1.861 |
| 393 | 261603_at | At1g49600 | 0.539 |
| 394 | 253437_at | At4g32460 | 0.539 |
| 395 | 260567_at | At2g43820 | 0.539 |
| 396 | 259360_at | At1g13310 | 1.854 |
| 397 | 257793_at | At3g26960 | 1.853 |
| 398 | 261211_at | At1g12780 | 0.54  |
| 399 | 256940_at | At3g30720 | 1.852 |
| 400 | 250699_at | At5g06820 | 1.851 |
| 401 | 247701_at | At5g59900 | 0.541 |
| 402 | 252316_at | At3g48700 | 0.542 |
| 403 | 264741_at | At1g62290 | 0.542 |
| 404 | 245193_at | At1g67810 | 0.542 |
| 405 | 246855_at | At5g26280 | 0.543 |
| 406 | 249382_at | At5g40050 | 1.841 |
| 407 | 259142_at | At3g10200 | 0.544 |
| 408 | 253684_at | At4g29690 | 0.544 |
| 409 | 247181_at | At5g65370 | 1.836 |
| 410 | 246114_at | At5g20250 | 0.545 |
| 411 | 267357_at | At2g40000 | 0.546 |
| 412 | 255652_at | At4g00950 | 1.832 |
| 413 | 256878_at | At3g26460 | 0.547 |
| 414 | 247463_at | At5g62210 | 1.828 |
| 415 | 245003_at | psbC      | 0.547 |
| 416 | 259285_at | At3g11460 | 0.547 |
| 417 | 265309_at | At2g20290 | 0.548 |
| 418 | 264049_at | At2g22390 | 1.826 |
| 419 | 251079_at | At5g02000 | 1.823 |
| 420 | 250468_at | At5g10120 | 0.549 |
| 421 | 260849_at | At1g21860 | 1.822 |
| 422 | 253800_at | At4g28160 | 1.82  |
| 423 | 257197_at | At3g23800 | 0.551 |
| 424 | 256589_at | At3g28740 | 0.551 |
| 425 | 258195_at | At3g13890 | 1.813 |
| 426 | 251870_at | At3g54510 | 0.552 |
| 427 | 251767_at | At3g55930 | 1.812 |
| 428 | 267083_at | At2g41100 | 0.553 |
| 429 | 256012_at | At1g19250 | 0.553 |



|     |           |           |       |
|-----|-----------|-----------|-------|
| 430 | 261799_at | At1g30470 | 1.808 |
| 431 | 249479_at | At5g38960 | 1.807 |
| 432 | 261157_at | At1g34510 | 0.554 |
| 433 | 245151_at | At2g47550 | 0.554 |
| 434 | 252836_at | At3g42070 | 1.803 |
| 435 | 263885_at | At2g36940 | 1.802 |
| 436 | 254274_at | At4g22770 | 1.801 |
| 437 | 263614_at | At2g25240 | 0.555 |
| 438 | 252489_at | At3g46710 | 1.795 |
| 439 | 254046_at | At4g26020 | 1.793 |
| 440 | 251127_at | At5g01080 | 1.793 |
| 441 | 255761_at | At1g16770 | 0.558 |
| 442 | 263784_at | At2g46375 | 1.792 |
| 443 | 250010_at | At5g18450 | 0.559 |
| 444 | 265643_at | At2g27390 | 1.786 |
| 445 | 245472_at | At4g16040 | 1.784 |
| 446 | 257395_at | At2g15630 | 0.561 |
| 447 | 258180_at | At3g21480 | 0.561 |
| 448 | 264160_at | At1g65450 | 1.782 |
| 449 | 259511_at | At1g12520 | 0.561 |
| 450 | 251364_at | At3g61300 | 1.781 |
| 451 | 261647_at | At1g27740 | 0.562 |
| 452 | 249726_at | At5g35480 | 1.778 |
| 453 | 265063_at | At1g61500 | 0.563 |
| 454 | 259371_at | At1g69080 | 1.776 |
| 455 | 247812_at | At5g58390 | 1.776 |
| 456 | 256957_at | At3g13420 | 1.774 |
| 457 | 254534_at | At4g19680 | 0.564 |
| 458 | 247254_at | At5g64800 | 1.774 |
| 459 | 246970_at | At5g24900 | 1.769 |
| 460 | 250826_at | At5g05220 | 0.566 |
| 461 | 251613_at | At3g57960 | 1.767 |
| 462 | 248536_at | At5g50140 | 0.566 |
| 463 | 244972_at | psbB      | 0.567 |
| 464 | 250589_at | At5g07700 | 1.764 |
| 465 | 256154_at | At3g08490 | 1.761 |
| 466 | 264411_at | At1g43240 | 1.761 |
| 467 | 264083_at | At2g31230 | 1.76  |
| 468 | 245278_at | At4g17730 | 0.569 |
| 469 | 265002_at | At1g24400 | 1.758 |
| 470 | 254914_at | At4g11290 | 0.569 |
| 471 | 245025_at | atpF      | 0.57  |
| 472 | 245539_at | At4g15220 | 0.57  |
| 473 | 260926_at | At1g21360 | 0.57  |
| 474 | 246297_at | At3g51760 | 1.754 |
| 475 | 264762_at | At1g61460 | 1.752 |
| 476 | 266125_at | At2g45050 | 0.571 |
| 477 | 256349_at | At1g54890 | 0.572 |
| 478 | 266165_at | At2g28190 | 0.572 |
| 479 | 252989_at | At4g38420 | 1.747 |
| 480 | 246229_at | At4g37160 | 0.573 |
| 481 | 257100_at | At3g25010 | 1.743 |
| 482 | 263497_at | At2g42540 | 0.574 |
| 483 | 263032_at | At1g23850 | 0.574 |

|     |             |           |       |
|-----|-------------|-----------|-------|
| 484 | 266393_at   | At2g41260 | 0.574 |
| 485 | 247769_at   | At5g58910 | 1.74  |
| 486 | 253608_at   | At4g30290 | 0.577 |
| 487 | 246925_at   | At5g25180 | 0.578 |
| 488 | 252539_at   | At3g45730 | 0.578 |
| 489 | 266175_at   | At2g02450 | 1.73  |
| 490 | 257548_s_at | At3g26620 | 1.728 |
| 491 | 266989_at   | At2g39330 | 0.579 |
| 492 | 254499_at   | At4g20100 | 1.727 |
| 493 | 258878_at   | At3g03170 | 0.579 |
| 494 | 246293_at   | At3g56710 | 1.725 |
| 495 | 246740_at   | At5g27810 | 1.725 |
| 496 | 246687_at   | At5g33370 | 1.723 |
| 497 | 248246_at   | At5g53200 | 1.722 |
| 498 | 248069_at   | At5g55650 | 0.581 |
| 499 | 265622_at   | At2g27280 | 1.721 |
| 500 | 260716_at   | At1g48130 | 0.582 |
| 501 | 247553_at   | At5g60910 | 1.717 |
| 502 | 249838_at   | At5g23460 | 0.582 |
| 503 | 267411_at   | At2g34930 | 0.583 |
| 504 | 254754_at   | At4g13210 | 1.715 |
| 505 | 247951_at   | At5g57240 | 0.584 |
| 506 | 259374_at   | At3g16280 | 1.712 |
| 507 | 252718_at   | At3g43940 | 1.711 |
| 508 | 256352_at   | At1g54970 | 0.585 |
| 509 | 265493_at   | At2g15670 | 1.709 |
| 510 | 245527_at   | At4g15960 | 0.585 |
| 511 | 267195_at   | At2g30940 | 1.708 |
| 512 | 257142_at   | At3g20090 | 1.705 |
| 513 | 247871_at   | At5g57530 | 0.586 |
| 514 | 245979_at   | At5g13150 | 0.587 |
| 515 | 261567_at   | At1g33055 | 0.587 |
| 516 | 248964_at   | At5g45340 | 0.587 |
| 517 | 262995_s_at | At1g54430 | 1.703 |
| 518 | 249802_at   | At5g23770 | 1.703 |
| 519 | 265644_at   | At2g27380 | 0.587 |
| 520 | 248614_at   | At5g49560 | 0.588 |
| 521 | 251646_at   | At3g57780 | 1.699 |
| 522 | 252286_at   | At3g49070 | 0.589 |
| 523 | 252436_x_at | At3g47330 | 1.697 |
| 524 | 255606_at   | At4g01110 | 1.697 |
| 525 | 266504_at   | At2g47820 | 1.697 |
| 526 | 261475_at   | At1g14550 | 0.589 |
| 527 | 262099_s_at | At1g59500 | 0.59  |
| 528 | 262719_at   | At1g43590 | 1.695 |
| 529 | 260144_at   | At1g71960 | 0.59  |
| 530 | 263945_at   | At2g36030 | 1.694 |
| 531 | 248286_at   | At5g52870 | 0.59  |
| 532 | 252576_s_at | At3g45450 | 0.591 |
| 533 | 250588_at   | At5g07660 | 0.591 |
| 534 | 249944_at   | At5g22290 | 0.591 |
| 535 | 267041_at   | At2g34315 | 0.591 |
| 536 | 262050_at   | At1g80130 | 1.691 |
| 537 | 263944_at   | At2g36040 | 1.69  |

|     |             |                   |       |
|-----|-------------|-------------------|-------|
| 538 | 265131_at   | At1g23760         | 0.592 |
| 539 | 263427_at   | At2g22260         | 1.688 |
| 540 | 250860_at   | At5g04770         | 0.593 |
| 541 | 249814_at   | At5g23840         | 0.593 |
| 542 | 245026_at   | atpH              | 0.593 |
| 543 | 263034_at   | At1g24020         | 1.686 |
| 544 | 263384_at   | At2g40130         | 1.685 |
| 545 | 254334_at   | At4g22760         | 0.593 |
| 546 | 267566_at   | At2g30760         | 1.684 |
| 547 | 249675_at   | At5g35940         | 0.594 |
| 548 | 261350_at   | At1g79770         | 1.681 |
| 549 | 255835_at   | At2g33420         | 1.68  |
| 550 | 251548_at   | At3g58870         | 1.679 |
| 551 | 259793_at   | At1g64380         | 0.596 |
| 552 | 247903_at   | At5g57340         | 0.596 |
| 553 | 249773_at   | At5g24140         | 0.596 |
| 554 | 259602_at   | At1g56520         | 1.676 |
| 555 | 251284_at   | At3g61840         | 1.676 |
| 556 | 247793_at   | At5g58650         | 0.597 |
| 557 | 244983_at   | rpl16.chloroplast | 0.597 |
| 558 | 266431_at   | At2g07230         | 1.675 |
| 559 | 255069_s_at | At4g08990         | 1.675 |
| 560 | 260742_at   | At1g15050         | 0.597 |
| 561 | 248660_at   | At5g48650         | 1.674 |
| 562 | 253651_at   | At4g30030         | 1.674 |
| 563 | 253931_at   | At4g26770         | 1.674 |
| 564 | 260178_at   | At1g70720         | 1.674 |
| 565 | 245005_at   | rps14             | 1.673 |
| 566 | 247954_at   | At5g56870         | 0.598 |
| 567 | 260342_at   | At1g69280         | 0.598 |
| 568 | 263851_at   | At2g04460         | 1.671 |
| 569 | 256302_at   | At1g69526         | 0.6   |
| 570 | 258257_at   | At3g26770         | 0.6   |
| 571 | 255029_x_at | At4g09470         | 1.665 |
| 572 | 258652_at   | At3g09910         | 0.601 |
| 573 | 247976_at   | At5g56830         | 1.664 |
| 574 | 247897_at   | At5g57810         | 1.663 |
| 575 | 261731_s_at | At1g47780         | 1.663 |
| 576 | 248251_at   | At5g53220         | 0.601 |
| 577 | 255156_at   | At4g07780         | 1.662 |
| 578 | 245420_at   | At4g17410         | 1.662 |
| 579 | 253492_at   | At4g31810         | 0.602 |
| 580 | 264214_s_at | At1g65330         | 1.66  |
| 581 | 265786_at   | At2g07300         | 1.659 |
| 582 | 251249_at   | At3g62160         | 0.603 |
| 583 | 246121_at   | At5g20370         | 1.659 |
| 584 | 245037_at   | At2g26420         | 0.603 |
| 585 | 245652_at   | At4g13960         | 1.658 |
| 586 | 258897_at   | At3g05730         | 1.657 |
| 587 | 255238_at   | At4g05570         | 1.656 |
| 588 | 248371_at   | At5g51810         | 0.604 |
| 589 | 247672_at   | At5g60220         | 0.605 |
| 590 | 246794_s_at | At5g27010         | 0.605 |
| 591 | 251405_at   | At3g60330         | 0.605 |

|     |             |                  |       |
|-----|-------------|------------------|-------|
| 592 | 250151_at   | At5g14570        | 0.605 |
| 593 | 249459_at   | At5g39580        | 1.651 |
| 594 | 248867_at   | At5g46830        | 1.651 |
| 595 | 248725_at   | At5g47980        | 0.606 |
| 596 | 267394_s_at | At2g44540        | 1.649 |
| 597 | 245009_at   | rps4.chloroplast | 0.607 |
| 598 | 258939_at   | At3g10020        | 0.607 |
| 599 | 260706_at   | At1g32350        | 1.647 |
| 600 | 249664_at   | At5g36810        | 1.647 |
| 601 | 260088_at   | At1g73190        | 0.607 |
| 602 | 245713_at   | At5g04370        | 0.607 |
| 603 | 262102_at   | At1g02980        | 1.644 |
| 604 | 265913_at   | At2g25625        | 1.642 |
| 605 | 249477_s_at | At5g38930        | 1.642 |
| 606 | 246103_at   | At5g28640        | 0.609 |
| 607 | 261641_at   | At1g27670        | 0.609 |
| 608 | 253904_at   | At4g27140        | 0.609 |
| 609 | 266978_at   | At2g39430        | 0.61  |
| 610 | 250807_at   | At5g05130        | 0.61  |
| 611 | 266756_at   | At2g46950        | 0.61  |
| 612 | 263173_at   | At1g54180        | 0.61  |
| 613 | 250379_at   | At5g11590        | 1.637 |
| 614 | 260262_at   | At1g68470        | 1.637 |
| 615 | 257842_at   | At3g28390        | 0.611 |
| 616 | 261702_at   | At1g32760        | 0.611 |
| 617 | 252115_at   | At3g51600        | 1.636 |
| 618 | 257247_at   | At3g24140        | 1.635 |
| 619 | 245050_at   | psbK             | 0.612 |
| 620 | 247374_at   | At5g63190        | 0.612 |
| 621 | 266784_at   | At2g28960        | 1.634 |
| 622 | 246321_at   | At1g16640        | 1.634 |
| 623 | 264513_at   | At1g09420        | 0.613 |
| 624 | 249091_at   | At5g43860        | 1.631 |
| 625 | 262013_s_at | At1g35640        | 1.629 |
| 626 | 247360_at   | At5g63450        | 0.614 |
| 627 | 247660_at   | At5g60070        | 1.629 |
| 628 | 260904_at   | At1g02450        | 1.628 |
| 629 | 263055_at   | At2g04600        | 1.626 |
| 630 | 253488_at   | At4g31610        | 1.626 |
| 631 | 256825_at   | At3g22120        | 1.625 |
| 632 | 264339_at   | At1g70290        | 0.616 |
| 633 | 253515_at   | At4g31320        | 0.616 |
| 634 | 257964_at   | At3g19850        | 1.622 |
| 635 | 252629_at   | At3g44970        | 1.622 |
| 636 | 248570_at   | At5g49780        | 1.62  |
| 637 | 267222_at   | At2g43880        | 0.618 |
| 638 | 267043_at   | At2g34330        | 1.617 |
| 639 | 250471_at   | At5g10170        | 1.617 |
| 640 | 254231_at   | At4g23810        | 0.618 |
| 641 | 265163_at   | At1g23580        | 1.617 |
| 642 | 244999_at   | rpoB             | 0.619 |
| 643 | 264991_s_at | At3g43400        | 1.616 |
| 644 | 250907_at   | At5g03670        | 0.619 |
| 645 | 248873_at   | At5g46450        | 1.613 |

|     |             |           |       |
|-----|-------------|-----------|-------|
| 646 | 253097_at   | At4g37320 | 1.613 |
| 647 | 245705_at   | At5g04390 | 0.62  |
| 648 | 245738_at   | At1g44130 | 1.612 |
| 649 | 244949_at   | orf116    | 1.611 |
| 650 | 253902_at   | At4g27170 | 1.611 |
| 651 | 255557_at   | At4g01990 | 0.621 |
| 652 | 248443_at   | At5g51310 | 1.61  |
| 653 | 257945_at   | At3g21860 | 1.61  |
| 654 | 264416_at   | At1g43140 | 1.61  |
| 655 | 253082_at   | At4g36230 | 1.609 |
| 656 | 247959_at   | At5g57080 | 1.608 |
| 657 | 264091_at   | At1g79110 | 1.606 |
| 658 | 263019_at   | At1g23870 | 0.623 |
| 659 | 244940_at   | rps12.2   | 0.623 |
| 660 | 245224_at   | At3g29796 | 1.605 |
| 661 | 256815_at   | At3g21380 | 0.623 |
| 662 | 264758_at   | At1g61340 | 0.623 |
| 663 | 256489_at   | At1g31550 | 1.605 |
| 664 | 260468_at   | At1g11100 | 1.604 |
| 665 | 252163_at   | At3g50610 | 1.603 |
| 666 | 252990_at   | At4g38440 | 0.624 |
| 667 | 246477_at   | At5g16770 | 1.603 |
| 668 | 255651_at   | At4g00940 | 1.603 |
| 669 | 258418_at   | At3g16660 | 1.602 |
| 670 | 262448_at   | At1g49450 | 0.624 |
| 671 | 264765_at   | At1g61430 | 1.602 |
| 672 | 254828_at   | At4g12550 | 0.624 |
| 673 | 265128_at   | At1g30860 | 0.624 |
| 674 | 253103_at   | At4g36110 | 1.602 |
| 675 | 246991_at   | At5g67400 | 0.625 |
| 676 | 249634_at   | At5g36840 | 1.601 |
| 677 | 255422_at   | At4g03270 | 1.6   |
| 678 | 246712_at   | At5g28200 | 1.6   |
| 679 | 248625_at   | At5g48880 | 1.6   |
| 680 | 266149_x_at | At2g12250 | 1.6   |
| 681 | 250501_at   | At5g09640 | 0.625 |
| 682 | 250400_at   | At5g10740 | 0.626 |
| 683 | 260429_at   | At1g72450 | 0.626 |
| 684 | 255005_at   | At4g09990 | 0.627 |
| 685 | 260160_at   | At1g79880 | 0.627 |
| 686 | 249102_at   | At5g43590 | 1.595 |
| 687 | 264195_at   | At1g22690 | 1.594 |
| 688 | 266661_at   | At2g25820 | 1.594 |
| 689 | 262603_at   | At1g15380 | 1.593 |
| 690 | 260011_at   | At1g68110 | 1.591 |
| 691 | 251084_at   | At5g01520 | 0.629 |
| 692 | 265746_at   | At2g06630 | 1.59  |
| 693 | 253894_at   | At4g27150 | 0.629 |
| 694 | 253682_at   | At4g29640 | 1.589 |
| 695 | 252004_at   | At3g52780 | 1.589 |
| 696 | 255526_at   | At4g02350 | 0.63  |
| 697 | 254743_at   | At4g13420 | 1.587 |
| 698 | 260720_at   | At1g48095 | 1.587 |
| 699 | 257588_x_at | At1g30150 | 1.586 |

|     |             |               |       |
|-----|-------------|---------------|-------|
| 700 | 247586_at   | At5g60660     | 0.63  |
| 701 | 247379_at   | At5g63360     | 1.586 |
| 702 | 252533_at   | At3g46110     | 1.586 |
| 703 | 257567_at   | At3g23930     | 1.584 |
| 704 | 252622_at   | At3g45310     | 0.631 |
| 705 | 265369_s_at | At2g06470     | 1.582 |
| 706 | 251009_at   | At5g02640     | 1.582 |
| 707 | 258064_at   | At3g14680     | 0.633 |
| 708 | 263890_at   | At2g37030     | 0.633 |
| 709 | 265518_at   | At2g06040     | 0.633 |
| 710 | 256368_at   | At1g66800     | 0.633 |
| 711 | 261399_at   | At1g79620     | 0.633 |
| 712 | 249333_at   | At5g40990     | 1.578 |
| 713 | 255122_at   | At4g08490     | 1.577 |
| 714 | 249596_s_at | At5g37950     | 0.634 |
| 715 | 252282_at   | At3g49360     | 1.576 |
| 716 | 255621_at   | At4g01390     | 1.576 |
| 717 | 263791_at   | At2g24520     | 1.576 |
| 718 | 253461_at   | At4g32170     | 1.576 |
| 719 | 266308_at   | At2g27010     | 0.635 |
| 720 | 259145_at   | At3g10170     | 0.635 |
| 721 | 261663_at   | At1g18330     | 0.635 |
| 722 | 246606_at   | At5g35350     | 1.574 |
| 723 | 266669_at   | At2g29750     | 0.635 |
| 724 | 262644_at   | At1g62710     | 0.635 |
| 725 | 263376_at   | At2g20520     | 0.636 |
| 726 | 250294_at   | At5g13380     | 0.636 |
| 727 | 255918_at   | At5g28570     | 1.573 |
| 728 | 262628_at   | At1g06490     | 0.636 |
| 729 | 254327_at   | At4g22490     | 1.572 |
| 730 | 266269_at   | At2g29480     | 0.637 |
| 731 | 264994_at   | At1g67270     | 1.571 |
| 732 | 255594_at   | At4g01660     | 0.637 |
| 733 | 260640_at   | At1g53350     | 1.57  |
| 734 | 244987_s_at | rpl2.1_chloro | 0.637 |
| 735 | 260333_at   | At1g70500     | 0.637 |
| 736 | 244979_at   | rps11         | 0.637 |
| 737 | 254673_at   | At4g18430     | 0.638 |
| 738 | 258002_at   | At3g28930     | 1.568 |
| 739 | 247030_at   | At5g67210     | 0.638 |
| 740 | 246251_at   | At4g37220     | 0.638 |
| 741 | 264682_at   | At1g65570     | 0.638 |
| 742 | 249438_at   | At5g40010     | 1.567 |
| 743 | 246107_at   | At5g28700     | 1.567 |
| 744 | 246871_at   | At5g26070     | 1.567 |
| 745 | 259183_at   | At3g01580     | 1.567 |
| 746 | 249476_at   | At5g38910     | 1.567 |
| 747 | 264564_at   | At1g05290     | 1.566 |
| 748 | 245154_at   | At5g12460     | 1.565 |
| 749 | 267138_s_at | At2g38210     | 0.639 |
| 750 | 262845_at   | At1g14740     | 0.639 |
| 751 | 266479_at   | At2g31160     | 1.564 |
| 752 | 246184_at   | At5g20950     | 0.639 |
| 753 | 249369_at   | At5g40680     | 0.64  |

|     |             |           |       |
|-----|-------------|-----------|-------|
| 754 | 251667_at   | At3g57150 | 0.64  |
| 755 | 255375_at   | At4g03780 | 1.563 |
| 756 | 263857_at   | At2g04380 | 1.562 |
| 757 | 262371_at   | At1g73160 | 0.64  |
| 758 | 264318_at   | At1g04220 | 0.64  |
| 759 | 267270_at   | At2g02550 | 1.561 |
| 760 | 256427_at   | At3g11090 | 1.56  |
| 761 | 261249_at   | At1g05880 | 1.56  |
| 762 | 248992_at   | At5g45230 | 1.559 |
| 763 | 247665_at   | At5g60130 | 1.559 |
| 764 | 262046_at   | At1g79960 | 1.559 |
| 765 | 260030_at   | At1g68880 | 1.558 |
| 766 | 248553_at   | At5g50170 | 0.642 |
| 767 | 256970_at   | At3g21090 | 0.642 |
| 768 | 246468_at   | At5g17050 | 1.556 |
| 769 | 246370_at   | At1g51920 | 1.555 |
| 770 | 267585_s_at | At2g42090 | 1.555 |
| 771 | 263098_at   | At2g16005 | 0.643 |
| 772 | 259694_at   | At1g63180 | 0.643 |
| 773 | 264618_at   | At2g17680 | 1.554 |
| 774 | 252686_at   | At3g44420 | 1.554 |
| 775 | 253602_s_at | At4g30910 | 0.644 |
| 776 | 267457_at   | At2g33790 | 0.644 |
| 777 | 264519_at   | At1g10000 | 1.551 |
| 778 | 250694_at   | At5g06710 | 0.645 |
| 779 | 248979_at   | At5g45080 | 1.55  |
| 780 | 254941_s_at | At4g10830 | 1.549 |
| 781 | 253837_at   | At4g27850 | 1.548 |
| 782 | 247914_at   | At5g57540 | 0.646 |
| 783 | 248205_at   | At5g54300 | 0.646 |
| 784 | 258078_at   | At3g25870 | 0.646 |
| 785 | 249136_at   | At5g43180 | 1.547 |
| 786 | 252719_at   | At3g43950 | 1.547 |
| 787 | 263913_at   | At2g36570 | 1.547 |
| 788 | 254056_at   | At4g25250 | 0.647 |
| 789 | 252813_at   | At3g42500 | 1.546 |
| 790 | 250267_at   | At5g12930 | 0.647 |
| 791 | 261283_s_at | At1g35770 | 1.545 |
| 792 | 246825_at   | At5g26260 | 0.648 |
| 793 | 266347_at   | At2g01440 | 1.544 |
| 794 | 251527_at   | At3g58650 | 1.542 |
| 795 | 262902_x_at | At1g59930 | 1.542 |
| 796 | 256060_at   | At1g07050 | 1.542 |
| 797 | 259796_at   | At1g64270 | 1.542 |
| 798 | 267192_at   | At2g30890 | 1.541 |
| 799 | 264819_at   | At1g03510 | 0.649 |
| 800 | 252234_at   | At3g49780 | 0.649 |
| 801 | 254513_at   | At4g20240 | 1.54  |
| 802 | 256553_at   | At3g31360 | 1.54  |
| 803 | 246973_at   | At5g24970 | 0.65  |
| 804 | 251698_at   | At3g56610 | 1.54  |
| 805 | 247478_at   | At5g62360 | 0.65  |
| 806 | 260942_s_at | At1g45190 | 1.537 |
| 807 | 250426_at   | At5g10510 | 0.651 |

|     |             |           |       |
|-----|-------------|-----------|-------|
| 808 | 254511_at   | At4g20220 | 1.536 |
| 809 | 258832_at   | At3g07070 | 1.536 |
| 810 | 247915_at   | At5g57570 | 1.535 |
| 811 | 253660_at   | At4g30140 | 1.535 |
| 812 | 260092_at   | At1g73280 | 0.652 |
| 813 | 246368_at   | At1g51890 | 1.534 |
| 814 | 249336_at   | At5g41070 | 0.652 |
| 815 | 258397_at   | At3g15357 | 0.652 |
| 816 | 255493_at   | At4g02690 | 0.652 |
| 817 | 260858_at   | At1g43770 | 1.534 |
| 818 | 262364_at   | At1g72860 | 1.534 |
| 819 | 250794_at   | At5g05270 | 1.534 |
| 820 | 266844_at   | At2g26120 | 1.533 |
| 821 | 248790_at   | At5g47450 | 0.653 |
| 822 | 256362_at   | At1g66450 | 0.653 |
| 823 | 259843_at   | At1g73570 | 0.653 |
| 824 | 250778_at   | At5g05500 | 0.653 |
| 825 | 249124_at   | At5g43740 | 1.531 |
| 826 | 245506_at   | At4g15700 | 1.531 |
| 827 | 255956_at   | At1g22015 | 1.53  |
| 828 | 264196_at   | At1g22670 | 1.53  |
| 829 | 263969_at   | At2g12940 | 1.53  |
| 830 | 252661_at   | At3g44450 | 1.529 |
| 831 | 248822_at   | At5g47000 | 0.654 |
| 832 | 259065_at   | At3g07520 | 1.528 |
| 833 | 260515_at   | At1g51460 | 1.528 |
| 834 | 248164_at   | At5g54490 | 0.654 |
| 835 | 265387_at   | At2g20670 | 0.654 |
| 836 | 262462_at   | At1g50350 | 1.527 |
| 837 | 262854_at   | At1g20870 | 1.527 |
| 838 | 253041_at   | At4g37870 | 0.655 |
| 839 | 262527_at   | At1g17010 | 0.655 |
| 840 | 251109_at   | At5g01600 | 0.655 |
| 841 | 267495_at   | At2g30420 | 1.526 |
| 842 | 253003_s_at | At4g38300 | 1.525 |
| 843 | 260788_at   | At1g06260 | 1.525 |
| 844 | 252057_at   | At3g52480 | 0.656 |
| 845 | 251304_at   | At3g61990 | 0.656 |
| 846 | 260990_at   | At1g12180 | 1.524 |
| 847 | 256670_at   | At3g32220 | 1.523 |
| 848 | 257693_at   | At3g12850 | 1.522 |
| 849 | 263622_at   | At2g04870 | 1.522 |
| 850 | 254625_at   | At4g18470 | 0.657 |
| 851 | 251025_at   | At5g02190 | 1.522 |
| 852 | 245329_at   | At4g14365 | 0.658 |
| 853 | 250982_at   | At5g03150 | 1.521 |
| 854 | 246603_at   | At1g31690 | 1.521 |
| 855 | 260962_at   | At1g44980 | 1.52  |
| 856 | 259182_at   | At3g01750 | 1.52  |
| 857 | 250980_at   | At5g03130 | 1.519 |
| 858 | 246401_at   | At1g57560 | 0.658 |
| 859 | 261600_x_at | At1g49680 | 1.519 |
| 860 | 254371_at   | At4g21760 | 1.519 |
| 861 | 265842_at   | At2g35700 | 1.519 |



|     |             |           |       |
|-----|-------------|-----------|-------|
| 862 | 244989_s_at | ycf2.1    | 1.518 |
| 863 | 251765_at   | At3g55880 | 1.518 |
| 864 | 254411_at   | At4g21420 | 1.518 |
| 865 | 255645_at   | At4g00880 | 0.659 |
| 866 | 264486_at   | At1g77180 | 0.659 |
| 867 | 253514_at   | At4g31805 | 1.516 |
| 868 | 259487_at   | At1g15720 | 1.516 |
| 869 | 261327_at   | At1g44830 | 0.66  |
| 870 | 260642_at   | At1g53260 | 1.515 |
| 871 | 265134_at   | At1g51260 | 1.515 |
| 872 | 267621_at   | At2g39680 | 1.515 |
| 873 | 257941_at   | At3g21800 | 0.66  |
| 874 | 266178_at   | At2g02280 | 1.515 |
| 875 | 256288_at   | At3g12270 | 0.66  |
| 876 | 252475_s_at | At3g46640 | 0.661 |
| 877 | 266600_at   | At2g46070 | 1.512 |
| 878 | 260424_at   | At1g72460 | 1.512 |
| 879 | 249897_at   | At5g22550 | 0.661 |
| 880 | 255467_at   | At4g03010 | 1.512 |
| 881 | 256919_at   | At3g18970 | 1.512 |
| 882 | 246670_at   | At5g29584 | 1.512 |
| 883 | 246807_at   | At5g27100 | 1.512 |
| 884 | 266539_at   | At2g35160 | 0.662 |
| 885 | 259173_at   | At3g03640 | 0.662 |
| 886 | 252804_at   | At3g42370 | 1.51  |
| 887 | 248212_at   | At5g54020 | 0.662 |
| 888 | 244973_at   | psbT      | 0.662 |
| 889 | 261545_at   | At1g63530 | 1.51  |
| 890 | 250558_at   | At5g07990 | 1.509 |
| 891 | 261598_at   | At1g49750 | 1.509 |
| 892 | 258170_at   | At3g21600 | 0.663 |
| 893 | 260067_at   | At1g73780 | 0.663 |
| 894 | 263963_at   | At2g36080 | 0.663 |
| 895 | 247778_at   | At5g58750 | 1.508 |
| 896 | 251812_at   | At3g54970 | 1.508 |
| 897 | 254520_at   | At4g19960 | 0.663 |
| 898 | 261006_at   | At1g26410 | 1.507 |
| 899 | 250776_at   | At5g05320 | 0.664 |
| 900 | 264093_at   | At1g79220 | 1.506 |
| 901 | 254597_at   | At4g18980 | 1.506 |
| 902 | 267191_at   | At2g44110 | 0.664 |
| 903 | 251124_s_at | At5g01040 | 0.664 |
| 904 | 257504_at   | At1g52250 | 0.664 |
| 905 | 246380_at   | At1g57750 | 1.505 |
| 906 | 261890_at   | At1g80970 | 1.504 |
| 907 | 261059_at   | At1g01250 | 1.504 |
| 908 | 256108_at   | At1g16940 | 1.504 |
| 909 | 251771_at   | At3g56000 | 0.665 |
| 910 | 267362_at   | At2g39910 | 1.503 |
| 911 | 265548_s_at | At2g07620 | 1.503 |
| 912 | 245081_at   | At2g23280 | 1.502 |
| 913 | 248509_at   | At5g50335 | 1.502 |
| 914 | 249661_x_at | At5g36650 | 1.502 |
| 915 | 247418_at   | At5g63030 | 0.666 |

|     |             |           |       |
|-----|-------------|-----------|-------|
| 916 | 265929_s_at | At2g18570 | 0.666 |
| 917 | 266737_at   | At2g47140 | 0.666 |
| 918 | 245754_at   | At1g35183 | 1.5   |
| 919 | 250915_at   | At5g03790 | 0.667 |
| 920 | 245501_at   | At4g15620 | 1.5   |
| 921 | 267424_at   | At2g34800 | 1.5   |
| 922 | 262659_at   | At1g14240 | 0.667 |
| 923 | 253796_at   | At4g28460 | 1.499 |
| 924 | 257392_at   | At2g24450 | 1.499 |
| 925 | 254299_at   | At4g22920 | 0.667 |
| 926 | 250415_at   | At5g11210 | 1.498 |
| 927 | 248879_at   | At5g46180 | 0.667 |
| 928 | 261223_at   | At1g19950 | 1.498 |
| 929 | 267595_at   | At2g32990 | 1.498 |
| 930 | 254044_at   | At4g25820 | 0.668 |
| 931 | 267084_at   | At2g41180 | 1.497 |
| 932 | 254269_at   | At4g23050 | 0.668 |
| 933 | 247029_at   | At5g67190 | 0.668 |
| 934 | 255694_at   | At4g00050 | 0.668 |
| 935 | 255450_at   | At4g02850 | 1.496 |
| 936 | 256557_at   | At3g31410 | 1.496 |
| 937 | 262915_at   | At1g59940 | 0.668 |
| 938 | 255875_s_at | At2g40500 | 1.496 |
| 939 | 246913_at   | At5g25830 | 0.669 |
| 940 | 263554_at   | At2g16410 | 1.495 |
| 941 | 254552_at   | At4g19900 | 0.669 |
| 942 | 261596_at   | At1g33080 | 1.495 |
| 943 | 260427_at   | At1g72430 | 0.669 |
| 944 | 261745_at   | At1g08500 | 0.669 |
| 945 | 264240_at   | At1g54820 | 1.494 |
| 946 | 254308_at   | At4g22410 | 1.494 |
| 947 | 247682_at   | At5g59650 | 1.494 |
| 948 | 254718_at   | At4g13580 | 0.67  |
| 949 | 254548_at   | At4g19870 | 1.492 |
| 950 | 258503_at   | At3g02500 | 1.492 |
| 951 | 264631_at   | At1g65630 | 1.492 |
| 952 | 249202_at   | At5g42580 | 0.67  |
| 953 | 266048_at   | At2g40790 | 0.67  |
| 954 | 250277_at   | At5g12940 | 0.671 |
| 955 | 252685_at   | At3g44410 | 0.671 |
| 956 | 266837_x_at | At2g25990 | 0.671 |
| 957 | 264754_at   | At1g61400 | 1.489 |
| 958 | 258204_at   | At3g13960 | 0.671 |
| 959 | 263572_at   | At2g17060 | 1.489 |
| 960 | 250887_at   | At5g04450 | 1.488 |
| 961 | 262374_s_at | At1g72930 | 1.487 |
| 962 | 258252_at   | At3g15720 | 0.673 |
| 963 | 255049_at   | At4g09610 | 0.673 |
| 964 | 257507_at   | At1g29600 | 1.487 |
| 965 | 255637_at   | At4g00750 | 0.673 |
| 966 | 261814_at   | At1g08310 | 0.673 |
| 967 | 244997_at   | rpoC2     | 0.673 |
| 968 | 252597_at   | At3g45360 | 1.486 |
| 969 | 256347_at   | At1g54923 | 1.486 |

|      |             |           |       |
|------|-------------|-----------|-------|
| 970  | 249607_at   | At5g37280 | 0.673 |
| 971  | 265511_at   | At2g05540 | 0.674 |
| 972  | 264800_at   | At1g08800 | 0.674 |
| 973  | 260312_at   | At1g63880 | 1.483 |
| 974  | 257416_at   | At2g17750 | 1.483 |
| 975  | 263395_at   | At2g20510 | 1.482 |
| 976  | 253859_at   | At4g27657 | 0.675 |
| 977  | 250292_at   | At5g13220 | 0.675 |
| 978  | 264489_at   | At1g27370 | 1.481 |
| 979  | 254043_at   | At4g25990 | 0.675 |
| 980  | 257203_at   | At3g23730 | 0.675 |
| 981  | 252280_at   | At3g49260 | 1.481 |
| 982  | 260166_at   | At1g79840 | 1.481 |
| 983  | 251756_at   | At3g55820 | 1.48  |
| 984  | 258545_at   | At3g07050 | 0.676 |
| 985  | 252598_at   | At3g45380 | 1.479 |
| 986  | 264415_at   | At1g43160 | 0.676 |
| 987  | 265117_at   | At1g62500 | 0.676 |
| 988  | 250665_at   | At5g06980 | 0.676 |
| 989  | 250748_at   | At5g05710 | 0.676 |
| 990  | 262803_at   | At1g21000 | 0.677 |
| 991  | 253998_at   | At4g26010 | 0.677 |
| 992  | 245162_at   | At2g33240 | 1.477 |
| 993  | 266286_at   | At2g29170 | 1.477 |
| 994  | 265561_s_at | At2g05510 | 0.678 |
| 995  | 261216_at   | At1g33030 | 1.476 |
| 996  | 250157_at   | At5g15180 | 0.678 |
| 997  | 247217_s_at | At5g65050 | 1.476 |
| 998  | 267565_at   | At2g30750 | 1.475 |
| 999  | 252908_at   | At4g39670 | 1.475 |
| 1000 | 259608_at   | At1g27960 | 0.678 |

---

Supplementary Table 1 - *FLC* responsive genes

Table showing list of 1000 genes showing greatest change in expression between *FRI*; *FLC* and *fri*; *flc* genotypes. Ranked according to fold change. Affymetrix probe ID and AGI number (or other identifier) shown for each gene (Note: where probe set targets multiple genes only single AGI number given). Fold change based on difference between average expression values of two biological replicates and expressed in terms of induction or repression in the *FRI*; *FLC* genotype. *FLC* and *AGL20* highlighted to right of table.
