# Supplementary material
Source: PubMed Central journal article supplement (PMC1383639)
Supplement: plntcell_tpc.105.038315_3.pdf [file plntcell_tpc.105.038315_3.pdf]

| Affy ID     | AGI                 | Gene Symbol       | BFC Cluster | Notes                                 |
|-------------|---------------------|-------------------|-------------|---------------------------------------|
| 259432_at   | At1g01520           | <i>LCL3</i>       | 18          | Transcription factor (myb)            |
| 265611_at   | At2g25510           |                   | 18          |                                       |
| 265954_at   | At2g37260           | <i>TTG2</i>       | 18          | Transcription factor                  |
| 252661_at   | At3g44450           |                   | 18          |                                       |
| 252629_at   | At3g44970           |                   | 18          | Electron transport                    |
| 252316_at   | At3g48700           |                   | 18          |                                       |
| 250794_at   | At5g05270           |                   | 18          | Flavonoid biosynthesis                |
| 245982_at   | At5g13170           |                   | 18          |                                       |
| 248625_at   | At5g48880           | <i>PKT1</i>       | 18          | acetyl-CoA C-acyltransferase activity |
| 247463_at   | At5g62210           | <i>ATS3</i>       | 18          |                                       |
| 265091_s_at | At1g03495/At1g03940 |                   | 20          | Transferase activity                  |
| 245624_at   | At4g14090           |                   | 20          | UDP-glycosyltransferase activity      |
| 254283_s_at | At4g22870/At4g22880 |                   | 20          | putative anthocyanidin synthase       |
| 250083_at   | At5g17220           | <i>ATGSTF12</i>   | 20          | toxin catabolism                      |
| 249215_at   | At5g42800           | <i>DFR</i>        | 20          | Anthocyanin biosynthesis              |
| 264091_at   | At1g79110           |                   | 21          |                                       |
| 253859_at   | At4g27657           |                   | 21          |                                       |
| 253097_at   | At4g37320           | <i>CYP81D5</i>    | 21          | Electron transport                    |
| 256060_at   | At1g07050           |                   | 22          | CONSTANS-like protein-related         |
| 262603_at   | At1g15380           |                   | 22          | Carbohydrate metabolism               |
| 252813_at   | At3g42500           |                   | 22          |                                       |
| 254805_at   | At4g12480           | <i>PEARLI 1 1</i> | 22          | Lipid transfer                        |
| 253161_at   | At4g35770           | <i>SEN1</i>       | 22          |                                       |
| 248509_at   | At5g50335           |                   | 22          |                                       |
| 247954_at   | At5g56870           |                   | 22          | beta-galactosidase activity           |
| 247478_at   | At5g62360           |                   | 22          | Pectinesterase inhibitor activity     |
| 261663_at   | At1g18330           | <i>EPR1</i>       | 23          | Transcription factor (myb)            |
| 266072_at   | At2g18700           | <i>ATTPS11</i>    | 23          | Transferase activity                  |
| 265387_at   | At2g20670           |                   | 23          |                                       |
| 253874_at   | At4g27450           |                   | 23          |                                       |
| 252475_s_at | At3g46640/At5g59570 | <i>LUX/-</i>      | 25          | Transcription factor (myb)            |
| 254043_at   | At4g25990           | <i>CIL</i>        | 25          |                                       |

Supplementary Table 2 - *FLC* clock candidate genes

List of 32 genes scored as *FLC* responsive and also in the top six highest amplitude BFC clusters. AGI numbers and gene symbols shown for each gene, along with BFC cluster number and notes on gene functions (from TAIR annotations).
